# Supplementary material for: Cu(OTf) 2 /HFIP catalyzed regioselective cycloisomerization of indole-C3-functionalized alkynols to carbazoles
Source: Royal Society of Chemistry journal article supplement (doi:10.1039/d4ob00421c), 2024-01-01
Supplement: d4ob00421c1.pdf [file d4ob00421c1.pdf]

## Supporting Information

### Cu(OTf)<sub>2</sub>/HFIP Catalyzed Regioselective Cycloisomerization of Indole-C3-functionalized Alkynols to Carbazoles

Srinivasarao Yaragorla,\* Tabassum Khan and Sayonika Chakroborthy

| Table of Contents                            | Page no. |
|----------------------------------------------|----------|
| I. Experimental Procedures                   | S1-S3    |
| II. References                               | S3       |
| III. Single Crystal XRD data                 | S3-S6    |
| IV. Spectral Copies of Synthesized Compounds | S7-S60   |

#### I. Experimental section

**II.A. General experimental procedure for the synthesis of 2,2-bis(1-alkyl/aryl-1H-indol-3-yl)-1-phenylethanone:**<sup>1</sup> A mixture of phenylglyoxal (1 equiv.), *N*-alkyl/aryl Indole (2 equiv.), *p*TSA (5 mol%), and CH<sub>3</sub>CN was stirred at room temperature for 7-8 hours. After completion of the reaction (monitored by TLC), the resulting mixture was quenched with water and extracted into ethyl acetate (thrice). Combined organic layers were washed with NaHCO<sub>3</sub> solution and dried over anhydrous Na<sub>2</sub>SO<sub>4</sub> and the solvent was evaporated to obtain the crude product. The crude product was purified by column chromatography to obtain pure product **C** in good yield.

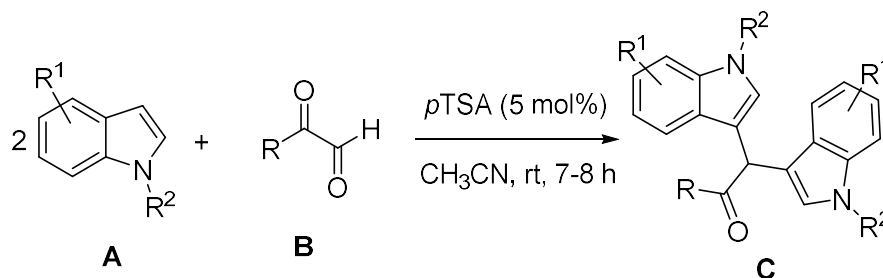

*Scheme S1.* Synthesis of 2,2-bis(1-alkyl/aryl-1H-indol-3-yl)-1-phenylethanone

**II. B. General experimental procedure for the synthesis of ketone E:**<sup>1</sup> A mixture of 2-hydroxy-1,2-diphenylethanone (1 equiv.) and *N*-alkyl/aryl Indole (1.2 equiv.), I<sub>2</sub> (1.2 equiv.) and acetonitrile were charged into an oven-dried round bottom flask and stirred at reflux temperature. The progress of the reaction was monitored by TLC. Then the reaction mass was quenched with Na<sub>2</sub>S<sub>2</sub>O<sub>3</sub> solution and extracted with ethyl acetate 2 times. The combined organic layer was concentrated, and crude was purified using column chromatography (60-120 mesh size, 15% EtOAc in pet ether).

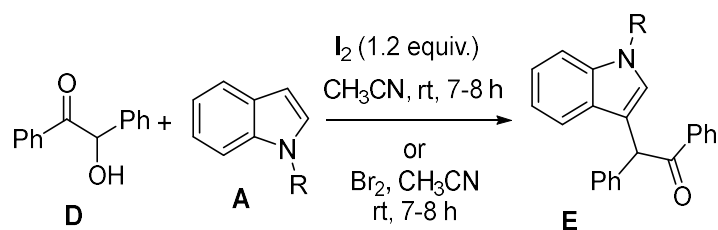

**Scheme S2.** Synthesis of heteroaryl substituted diphenylethanone

**II.C. General experimental procedure for the propargyl alcohol 1:**<sup>2</sup> To a solution of terminal alkyne (6 mmol) at 0 °C in THF (10-30 mL), was added 3 equiv., 6 mmol of *n*-BuLi (2 M in hexanes). The solution was stirred at 0 °C for 20 min, then the appropriate  $\alpha$ -(3-indolyl) ketone was added (2 mmol, 1.0 equiv.) at -40°C. The resulting mixture was stirred at room temperature until the starting ketone was consumed as determined by TLC. The reaction was quenched with a saturated aqueous NH<sub>4</sub>Cl solution and extracted with AcOEt (3 × 20 mL). The combined organic layers were dried over anhydrous Na<sub>2</sub>SO<sub>4</sub>, filtered and concentrated at reduced pressure. The residue was purified by flash chromatography on silica gel using mixtures of hexane and AcOEt as eluents to obtain the alkynols **1**.

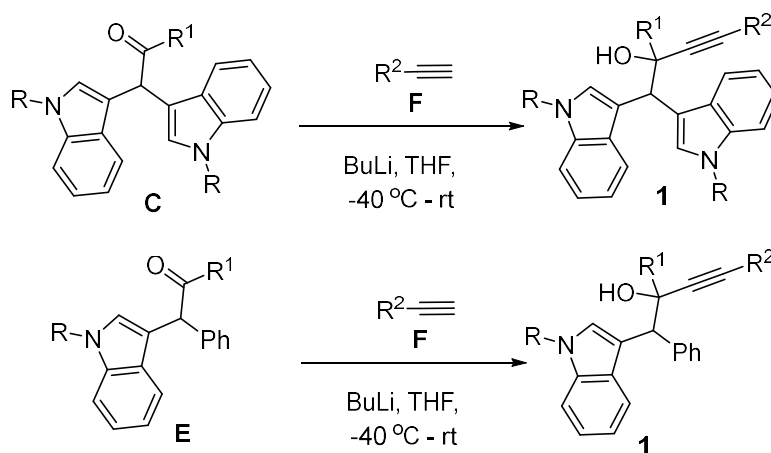

**Scheme S3.** Synthesis of propargyl alcohols

**General experimental procedure for the Synthesis of carbazole 2:** Alkynol **1** (100 mg, 1 equiv.), HFIP (0.2 mL) and 10 mol% Cu(OTf)<sub>2</sub> were weighed into a small round bottom flask equipped with a tiny magnetic bead and stirred slowly at room temperature. The reaction turned reddish immediately after the addition of HFIP. A slow stirring is required to avoid the spilling of the reaction mixture onto the walls of the reaction flask. The reaction progress was monitored by TLC. After completion of the reaction, the crude compound was absorbed into silica gel and purified by column chromatography on silica gel using a mixture of hexane and AcOEt as eluents to obtain the carbazole **2**.

The detailed images of the reaction mixture are given below for more clarity.

|                                                                                   |                                                                                   |                                                                                   |                                                                                    |                                                                                     |
|-----------------------------------------------------------------------------------|-----------------------------------------------------------------------------------|-----------------------------------------------------------------------------------|------------------------------------------------------------------------------------|-------------------------------------------------------------------------------------|
|  |  |  |  |  |
| Before addition of HFIP                                                           | Beginning of the reaction                                                         | Middle of the reaction                                                            | After completion of the reaction                                                   | TLC of the reaction                                                                 |

## II. References

1. Suárez, A.; Martínez, F.; Suárez-Pantiga, S.; Sanz, R. *p*TSA-Catalyzed Reaction of Indoles with 2-Oxoaldehydes: Synthesis of  $\alpha$ ,  $\alpha$ -Bis(indol-3-yl) Ketones. *ChemistrySelect* **2017**, *2*, 787-790.
2. Suárez, A.; Suárez-Pantiga, S.; Nieto-Faza, O.; Sanz, R. Gold-catalyzed synthesis of 1-(indol-3-yl) carbazoles: Selective 1, 2-alkyl vs 1, 2-vinyl migration. *Org. Lett.* **2017**, *19*, 5074-5077.

## III. Single Crystal XRD data

The vapor diffusion crystallization method was used for crystal growth, where the compound was dissolved in chloroform by heating to make a saturated solution in a small vial which was placed in a closed bottle with another solvent as *n*-hexane. The crystal data was recorded on Bruker Apex-II CCD.

### III.A. X-ray data of Compound 2j:

|                      |                                                                                                                    |
|----------------------|--------------------------------------------------------------------------------------------------------------------|
| Identification code  | ysr013                                                                                                             |
| Empirical formula    | C <sub>31</sub> H <sub>26</sub> N <sub>2</sub>                                                                     |
| Formula weight       | 426.54                                                                                                             |
| Temperature          | 296 K                                                                                                              |
| Wavelength           | 0.71073 Å                                                                                                          |
| Crystal system       | 'Monoclinic'                                                                                                       |
| Space group          | P1 21/n 1                                                                                                          |
| Unit cell dimensions | a = 13.23 (18) Å $\alpha$ = 90.<br>b = 9.3280 (11) Å $\beta$ = 102.019 (5).<br>c = 19.219 (3) Å $\gamma$ = 90 (5). |
| Volume               | 2320.3 (5)                                                                                                         |

|                                   |                                    |
|-----------------------------------|------------------------------------|
| Z                                 | 4                                  |
| Density                           | 1.221 g/cm <sup>3</sup>            |
| Absorption coefficient            | 0.071 mm <sup>-1</sup>             |
| F (000)                           | 904                                |
| Crystal size                      | 0.21 x 0.17 x 0.12 mm <sup>3</sup> |
| Theta (max)                       | 25.35                              |
| Index ranges                      | -15<=h<=15, -11<=k<=11, -23<=l<=23 |
| Reflections collected             | 54774                              |
| R (reflection)                    | 0.049 (3215)                       |
| wR2 (reflections)                 | 0.2386( 4254)                      |
| restraints / parameters           | 285/288                            |
| Goodness-of-fit on F <sup>2</sup> | 1.034                              |
| Tmin, Tmax                        | 0.655, 0.746                       |
| Data completeness                 | 1.000                              |
| S                                 | 1.034                              |
| Npar                              | 288                                |
| CCDC No.                          | 2249416                            |

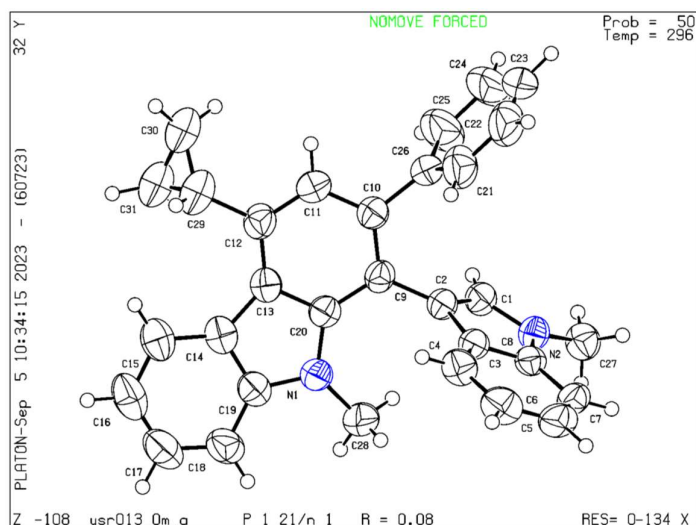

*Figure S1.* ORTEP representation of compound **2j** and thermal ellipsoids are drawn with 50% probability.

### III.B. X-ray data of Compound **2k**:

|                     |                                                |
|---------------------|------------------------------------------------|
| Identification code | ysr032                                         |
| Empirical formula   | C <sub>35</sub> H <sub>28</sub> N <sub>2</sub> |
| Formula weight      | 476.59                                         |
| Temperature         | 298 K                                          |
| Wavelength          | 0.71073 Å                                      |
| Crystal system      | 'Monoclinic'                                   |
| Space group         | P 1 21/n 1                                     |

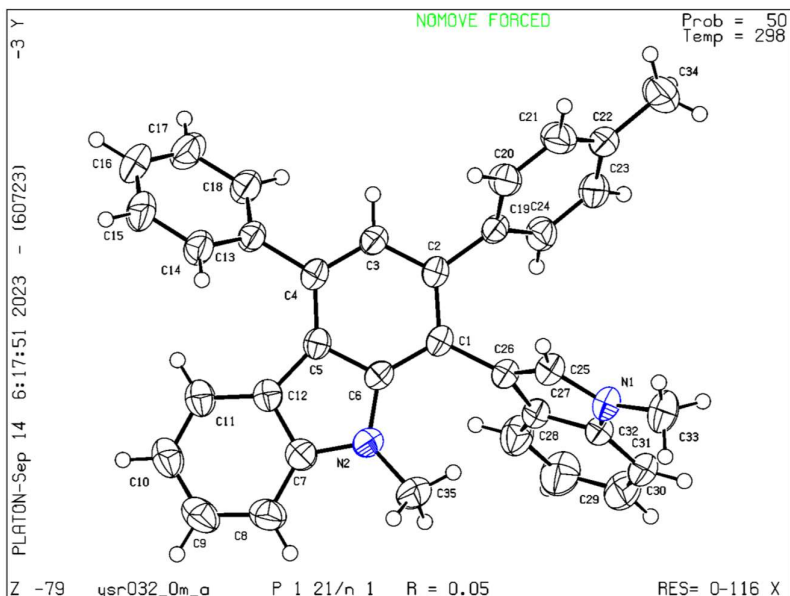

**Figure S2.** ORTEP representation of compound **2k** and thermal ellipsoids are drawn with 50% probability.

|                                   |                                                     |
|-----------------------------------|-----------------------------------------------------|
| Unit cell dimensions              | $a = 10.7077 (8) \text{ \AA}$ $\alpha = 90$ .       |
|                                   | $b = 9.2729 (7) \text{ \AA}$ $\beta = 98.298 (3)$ . |
|                                   | $c = 25.954 (2) \text{ \AA}$ $\gamma = 90$ .        |
| Volume                            | 2550.0 (3)                                          |
| Z                                 | 4                                                   |
| Density                           | 1.241 g/cm <sup>3</sup>                             |
| Absorption coefficient            | 0.072 mm <sup>-1</sup>                              |
| F (000)                           | 1008.0                                              |
| Crystal size                      | 0.21 x 0.17 x 0.11 mm <sup>3</sup>                  |
| Theta (max)                       | 27.539                                              |
| Index ranges                      | -13 ≤ h ≤ 13, -12 ≤ k ≤ 12, -33 ≤ l ≤ 33            |
| Reflections collected             | 50346                                               |
| R (reflection)                    | 0.0514 (4500)                                       |
| wR2 (reflections)                 | 0.1462 ( 5871)                                      |
| restraints / parameters           | 0/337                                               |
| Goodness-of-fit on F <sup>2</sup> | 1.064                                               |
| Tmin, Tmax                        | 0.502, 0.746                                        |
| Data completeness                 | 0.999                                               |
| S                                 | 1.064                                               |
| Npar                              | 337                                                 |
| CCDC No.                          | 2294921                                             |

### II.C. X-ray data of Compound **2y**:

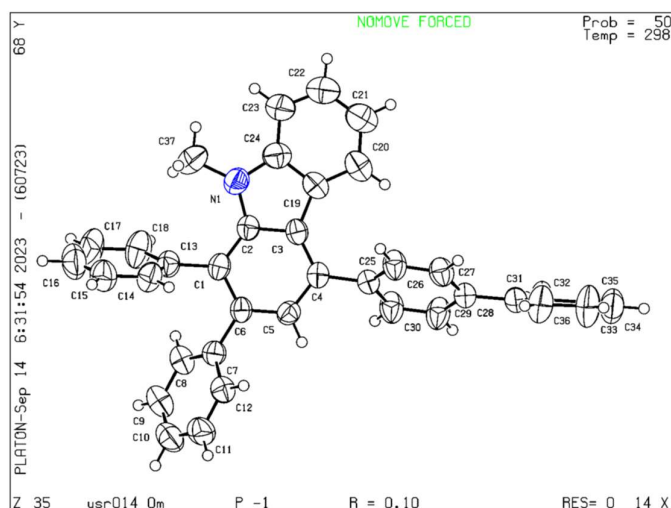

**Figure S3.** ORTEP representation of compound **2y** and thermal ellipsoids are drawn with 50% probability.

|                                   |                                          |
|-----------------------------------|------------------------------------------|
| Identification code               | ysr014                                   |
| Empirical formula                 | C <sub>37</sub> H <sub>27</sub> N        |
| Formula weight                    | 485.59                                   |
| Temperature                       | 298 K                                    |
| Wavelength                        | 0.71073 Å                                |
| Crystal system                    | 'Triclinic'                              |
| Space group                       | P -1                                     |
| Unit cell dimensions              | a = 9.6614 (12) Å α = 66.465 (4).        |
|                                   | b = 12.3016 (5) Å β = 77.764 (5).        |
|                                   | c = 12.4047 (5) Å γ = 82.339 (5).        |
| Volume                            | 1319.0 (3)                               |
| Z                                 | 2                                        |
| Density                           | 1.223 g/cm <sup>3</sup>                  |
| Absorption coefficient            | 0.070 mm <sup>-1</sup>                   |
| F (000)                           | 512.0                                    |
| Crystal size                      | 0.2 x 0.15 x 0.1 mm <sup>3</sup>         |
| Theta (max)                       | 25.349                                   |
| Index ranges                      | -11 ≤ h ≤ 11, -14 ≤ k ≤ 14, -14 ≤ l ≤ 14 |
| Reflections collected             | 20603                                    |
| R (reflection)                    | 0.1040 (2010)                            |
| wR2 (reflections)                 | 0.2919 (4319)                            |
| restraints / parameters           | 0/344                                    |
| Goodness-of-fit on F <sup>2</sup> | 0.970                                    |
| Tmin, Tmax                        | 0.609, 0.746                             |
| Data completeness                 | 0.892                                    |
| S                                 | 0.970                                    |
| Npar                              | 344                                      |
| CCDC No.                          | 2294918                                  |

# IV. Copies <sup>1</sup>H and <sup>13</sup>C NMR

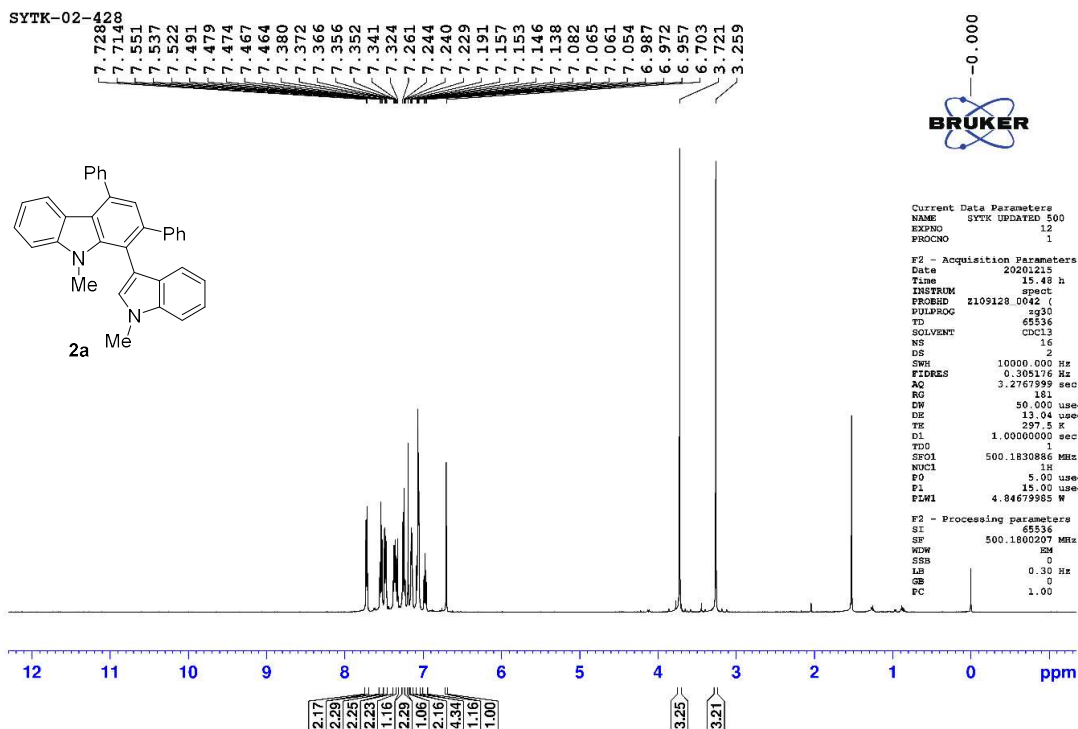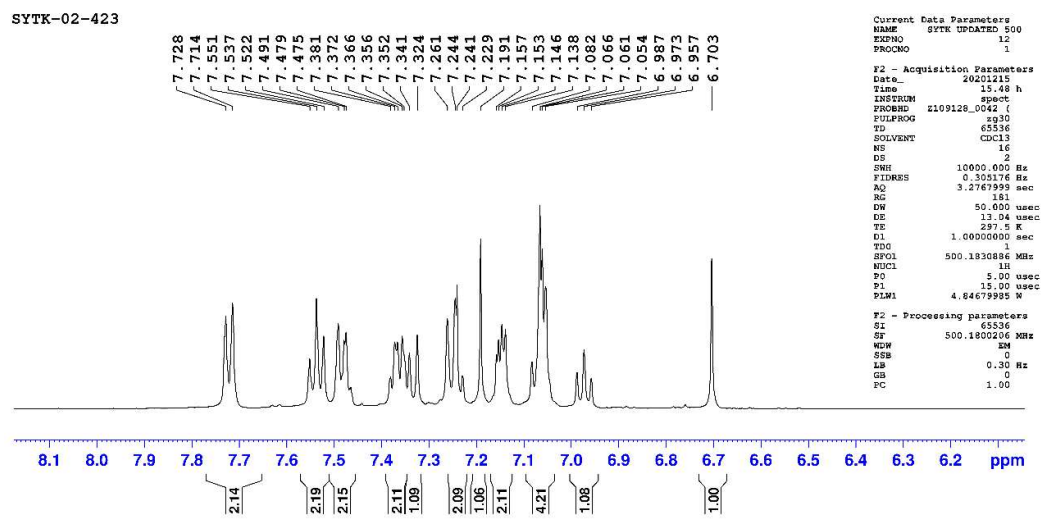

SYTK-02-428

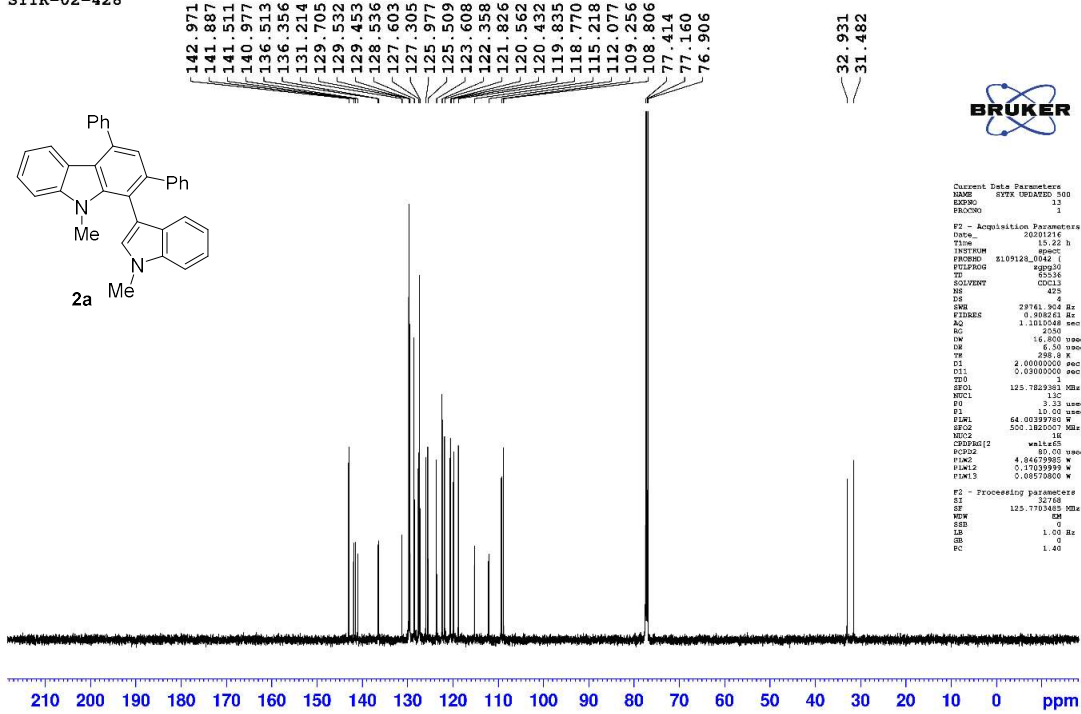

**BRUKER**

```

Current Data Parameters
NAME  SYTK_UPDATED_500
EXPNO  1
PROCNO  1
Date_  20010716
Time  15.22 h
INSTRUM  spect
PROBHD  zgpg30
PULPROG  zgpg30
TD  65536
SOLVENT  CDCl3
DS  4
DE  2
RG  2941.904 Hz
F2  0.000000 Hz
AQ  1.3010048 sec
RG  2500
AQ  16.800 usec
DE  6.50 usec
TE  298.8 K
D1  2.0000000 sec
D11  0.0300000 sec
TD0  1
SFO1  125.7629281 MHz
NUC1  13C
P1  3.33 usec
P2  10.00 usec
PL1  64.00399780 W
PL2  550.3820007 MHz
NUC2  1H
CROSSP2  waltz16
PCPD2  80.00 usec
PLD  4.8467980 W
PLM2  0.17039999 W
PLM3  0.00370000 W
P2 - Processing Parameters
SI  32768
SF  125.7629281 MHz
WDW  EM
SSB  0
LB  1.00 Hz
GB  0
PC  1.40
    
```

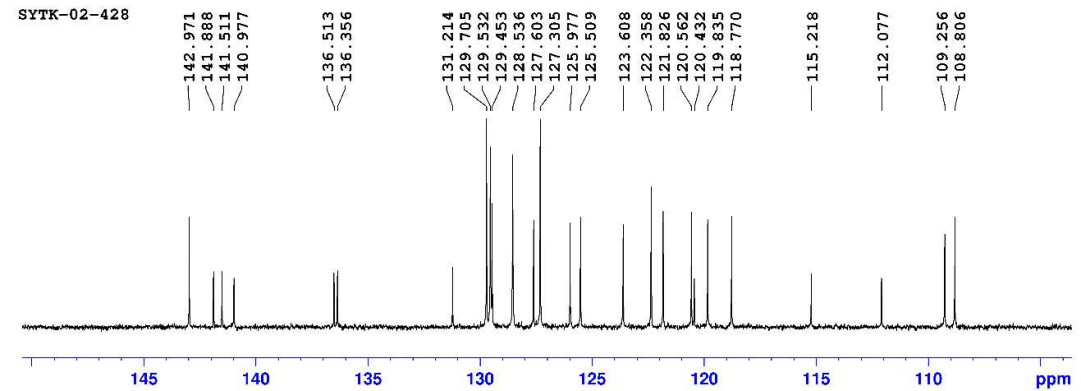



SYTK-02-430

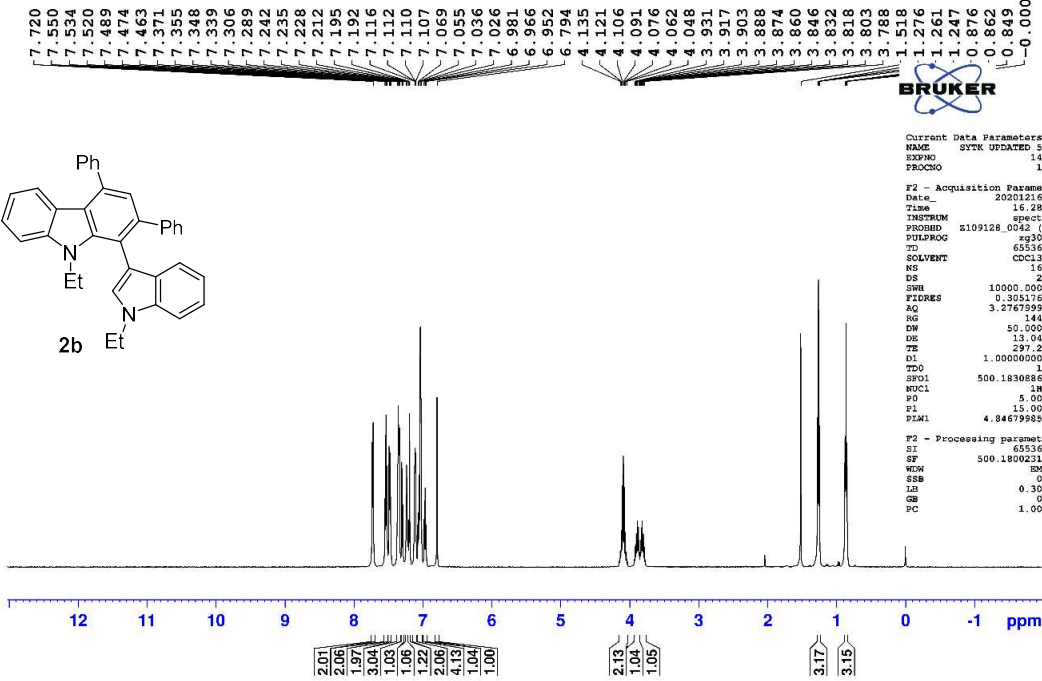

SYTK-02-430

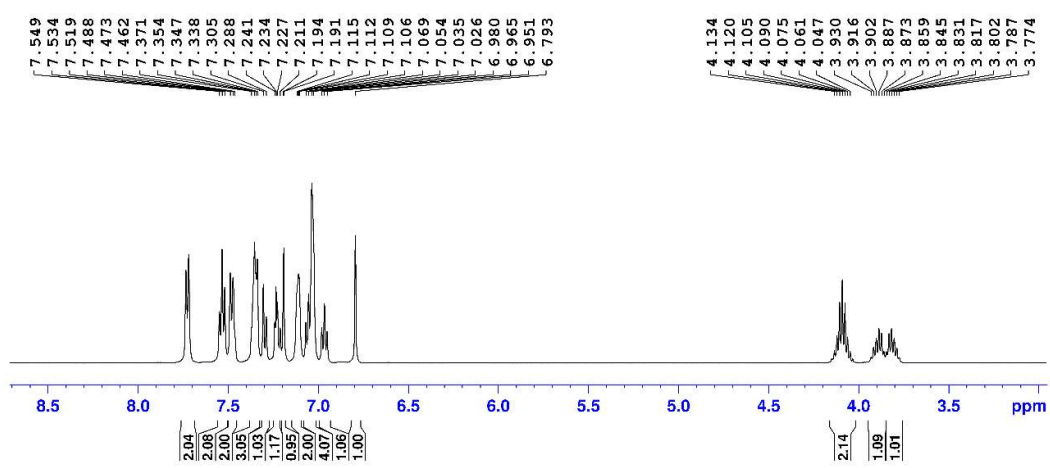

SYTK-02-430

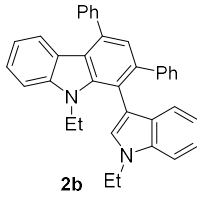

143.079  
142.174  
141.836  
141.581  
139.870  
136.555  
135.197  
131.201  
129.648  
129.550  
128.515  
127.568  
127.433  
127.191  
125.867  
125.416  
123.423  
122.882  
122.511  
121.713  
120.842  
120.567  
119.693  
118.730  
115.284  
112.049  
109.409  
109.112  
77.414  
77.160  
76.906

40.956  
38.462

15.813  
14.388

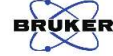

Current Data Parameters  
NAME: SYTK-02-430  
EXPNO: 1  
PROCNO: 1  
P2 - Acquisition Parameters  
Date\_: 20201217  
Time: 11:42 h  
INSTRUM: spect  
PROBHD: z109128 0042 (1  
PULPROG: zgpg30  
TD: 65536  
SOLVENT: CDCl3  
NS: 128  
DS: 2  
SWH: 29761.904 Hz  
FIDRES: 0.888261 Hz  
AQ: 1.2010648 sec  
RG: 203  
IN: 16.800 usec  
DE: 6.30 usec  
TE: 2  
D1: 2.00000000 sec  
S1: 0.03000000 sec  
DD: 2  
SFO1: 125.7629381 MHz  
NUC1: 13C  
P0: 3.13 usec  
P1: 15.00 usec  
PC1: 64.0039980 W  
PC2: 505.1820007 MHz  
NUC2: 1H  
PC2PRG2: waltz16  
PC2: 80.00 usec  
PL2: 4.84679985 W  
PL12: 0.1333999 W  
PL13: 0.04570800 W  
P2 - Processing parameters  
SI: 32768  
SF: 125.7703482 MHz  
WDW: EM  
SSB: 0  
LB: 1.00 Hz  
GB: 0  
PC: 1.40

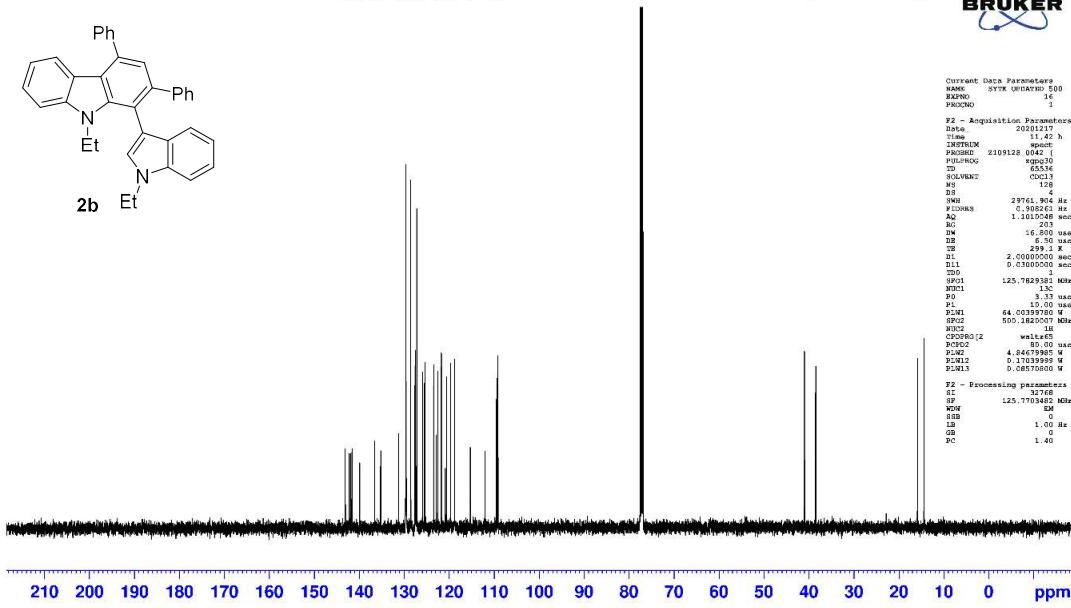

SYTK-02-430

143.079  
142.174  
141.836  
141.581  
139.870  
136.555  
135.197  
131.201  
129.648  
129.550  
128.515  
127.568  
127.433  
127.191  
125.867  
125.416  
123.423  
122.882  
122.512  
121.713  
120.842  
120.567  
119.693  
118.730  
115.284  
112.049  
109.409  
109.112

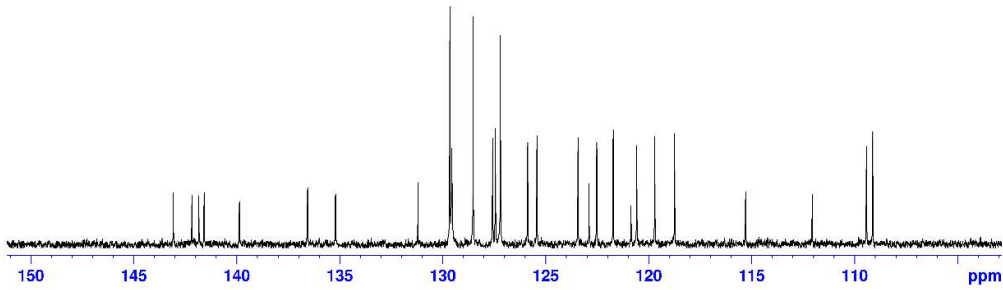

SYTK-Bn C

7.762  
7.575  
7.561  
7.546  
7.534  
7.518  
7.515  
7.500  
7.364  
7.348  
7.304  
7.302  
7.288  
7.245  
7.221  
7.204  
7.187  
7.172  
7.167  
7.160  
7.157  
7.146  
7.143  
7.138  
7.136  
7.130  
7.128  
7.126  
7.121  
7.110  
7.096  
7.063  
7.048  
7.042  
7.032  
7.027  
7.022  
7.016  
7.013  
7.009  
6.999  
6.992  
6.615  
6.602  
6.599  
6.514  
6.502  
6.498  
6.237  
5.128  
5.096  
5.076  
5.056  
4.891  
4.658  
1.535  
-0.000

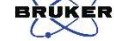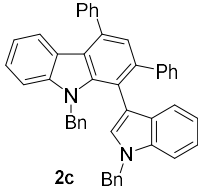

Current Data Parameters  
NAME SYTK UPDATED 500  
EXPNO 182  
PROCNO 1

F2 - Acquisition Parameters  
Date\_ 20221114  
Time 17.09 h  
INSTRUM spect  
PROBHD 2109128.0042 /  
PULPROG zg30  
TD 65536  
SOLVENT CCl4  
MS 15  
DS 2  
SHE 10000.000 Hz  
FIDRES 0.305176 Hz  
AQ 3.2767999 sec  
RG 181  
DW 50.000 usec  
DE 13.04 usec  
TE 296.7 K  
DL 1.00000000 sec  
F2 1  
SFO1 500.1830885 MHz  
NUC1 1H  
P0 5.00 usec  
P1 15.00 usec  
PLW1 4.8467995 W

F2 - Processing parameters  
SI 65536  
SF 500.1800197 MHz  
WDW EM  
SSB 0  
LB 0.30 Hz  
GB 6  
PC 1.00

12 11 10 9 8 7 6 5 4 3 2 1 0 -1 ppm

2.02  
1.99  
2.19  
0.99  
1.27  
1.19  
1.33  
2.84  
3.22  
3.12  
5.82  
2.13  
2.04  
1.00  
3.07  
1.06

SYTK-Bn C

7.776  
7.762  
7.575  
7.561  
7.546  
7.534  
7.518  
7.515  
7.500  
7.364  
7.348  
7.304  
7.302  
7.288  
7.245  
7.221  
7.204  
7.187  
7.172  
7.167  
7.160  
7.157  
7.146  
7.143  
7.138  
7.136  
7.130  
7.129  
7.126  
7.121  
7.110  
7.096  
7.063  
7.048  
7.042  
7.032  
7.027  
7.022  
7.016  
7.013  
7.009  
6.999  
6.992  
6.978  
6.977  
6.615  
6.602  
6.599  
6.514  
6.502  
6.498  
6.237  
5.129  
5.096  
5.076  
5.076  
5.077  
4.651  
4.659

7.5 7.0 6.5 6.0 5.5 5.0 4.5 ppm

2.03  
2.05  
2.13  
1.01  
1.29  
0.98  
1.16  
3.03  
3.23  
3.24  
5.65  
2.12  
2.05  
1.00  
3.10  
1.13

SYTK-Bn C

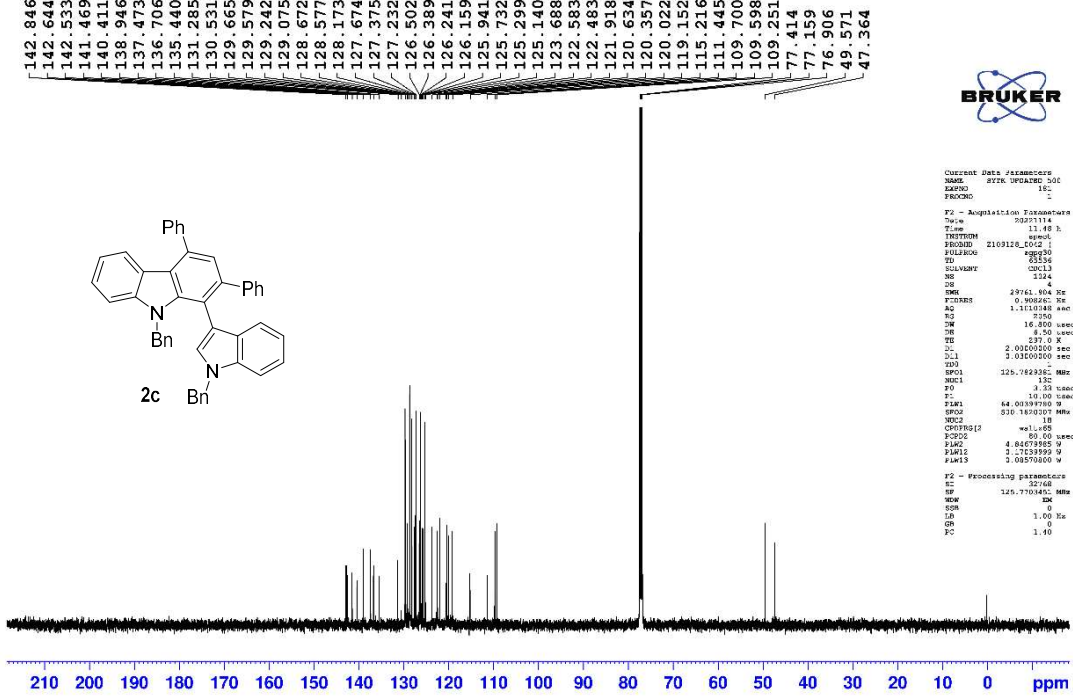

SYTK-Bn C

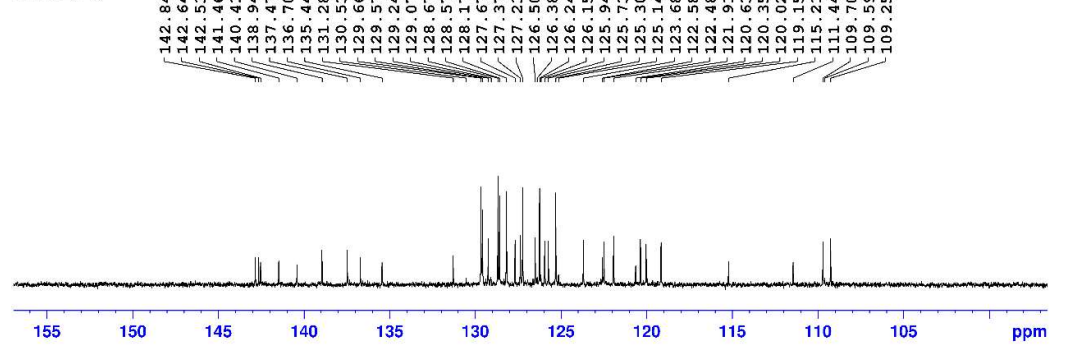

SYTK-02-Allyl

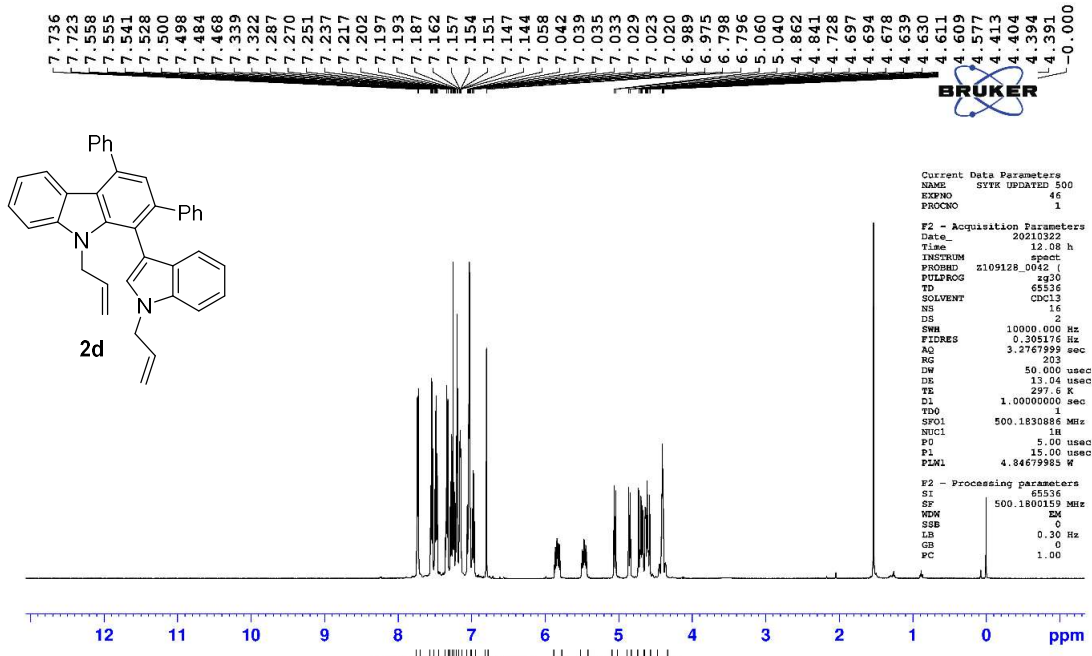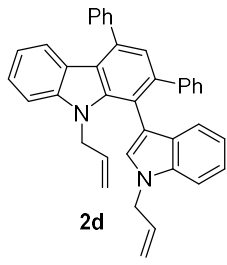

SYTK-02-Allyl

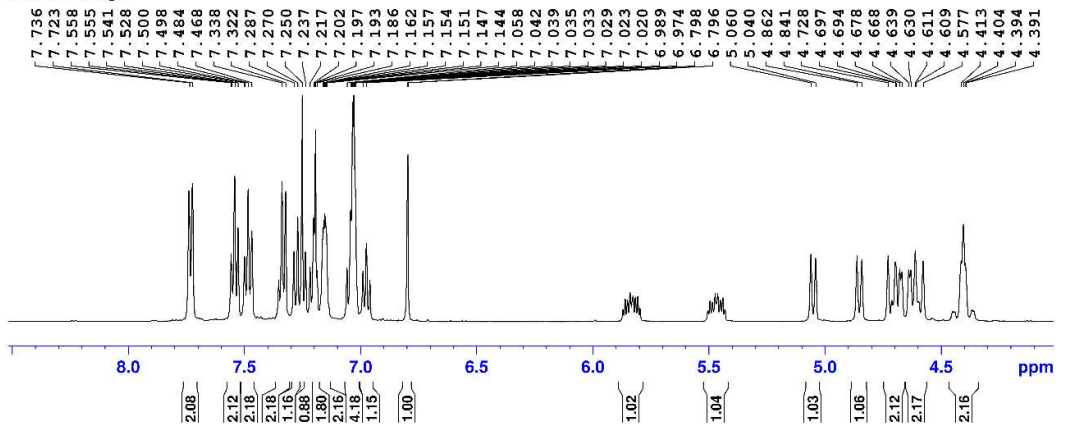

SYTK-02-ALLYL

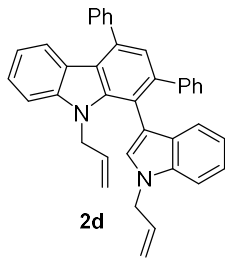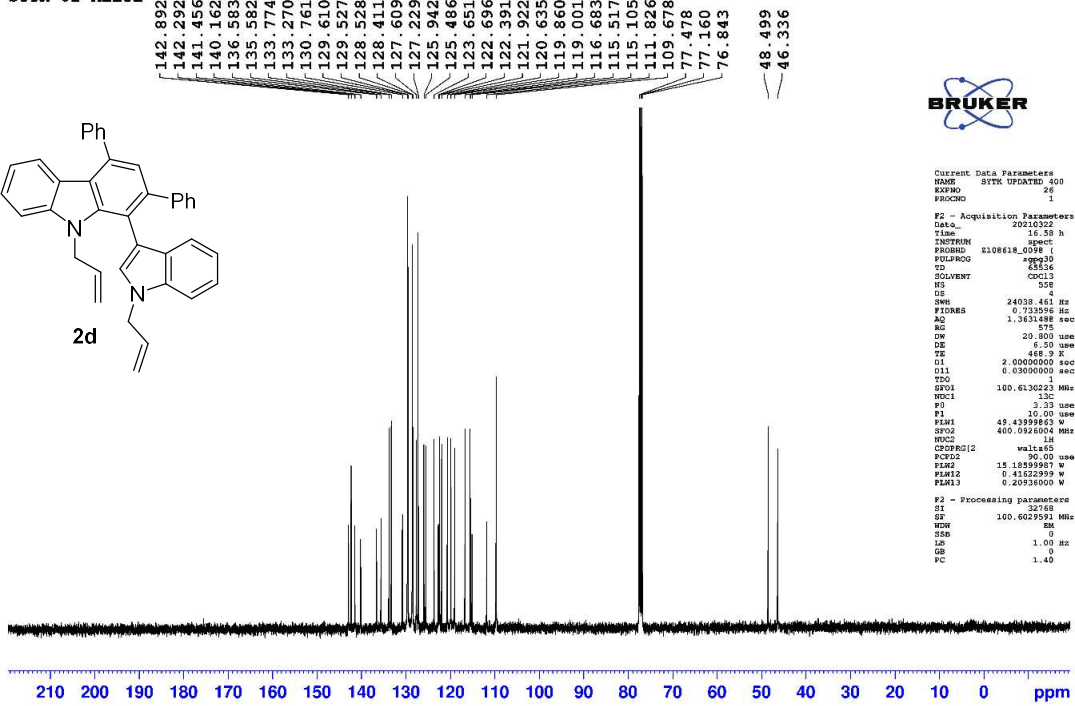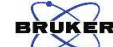

```

Current Data Parameters
NAME      SYTK_UPDATED_03
EXPNO    26
PROCNO   1

F2 - Acquisition Parameters
Date_    20210322
Time     16.58 h
INSTRUM  spect
PROBHD   Z108618_009# (
PULPROG  zgpg30
TD       65536
SOLVENT  CDCl3
NS       558
DS       4
SWH      24039.461 Hz
FIDRES   0.732056 Hz
AQ       1.3631498 sec
RG        578
AQ       20.800 usec
DE        6.50 usec
TE       488.3 K
D1       2.0000000 sec
d11      0.0300000 sec
TSD      1
SFO1     100.6130293 MHz
WDW1     15C
F0       2.23 usec
P1       10.00 usec
PLM1     45.43399883 W
SFO2     400.0926004 MHz
WDW2     18
PCPFG2   waltz16
PCPD2    90.00 usec
PLM2     15.18598861 W
PLM12    0.41522959 W
PLM13    0.20265000 W

F2 - Processing parameters
SI       32768
SF       100.6029591 MHz
WDW      EM
SSB      0
LB       1.00 Hz
GB       0
PC       1.40
    
```

SYTK-02-ALLYL

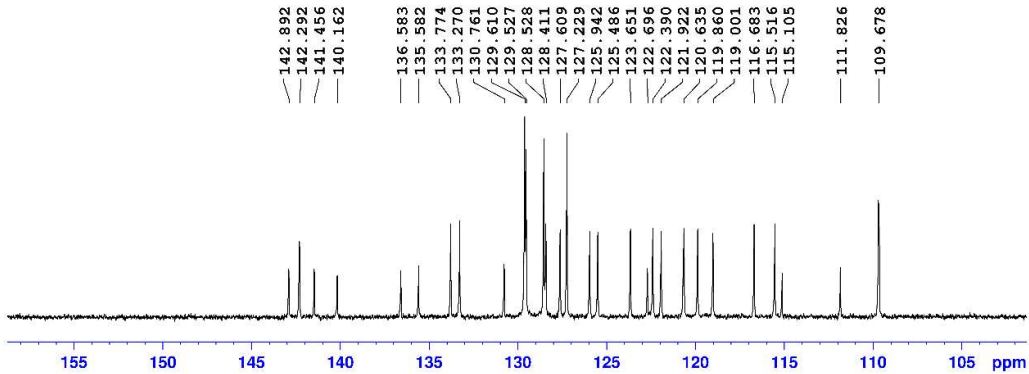

SYTK-49 B

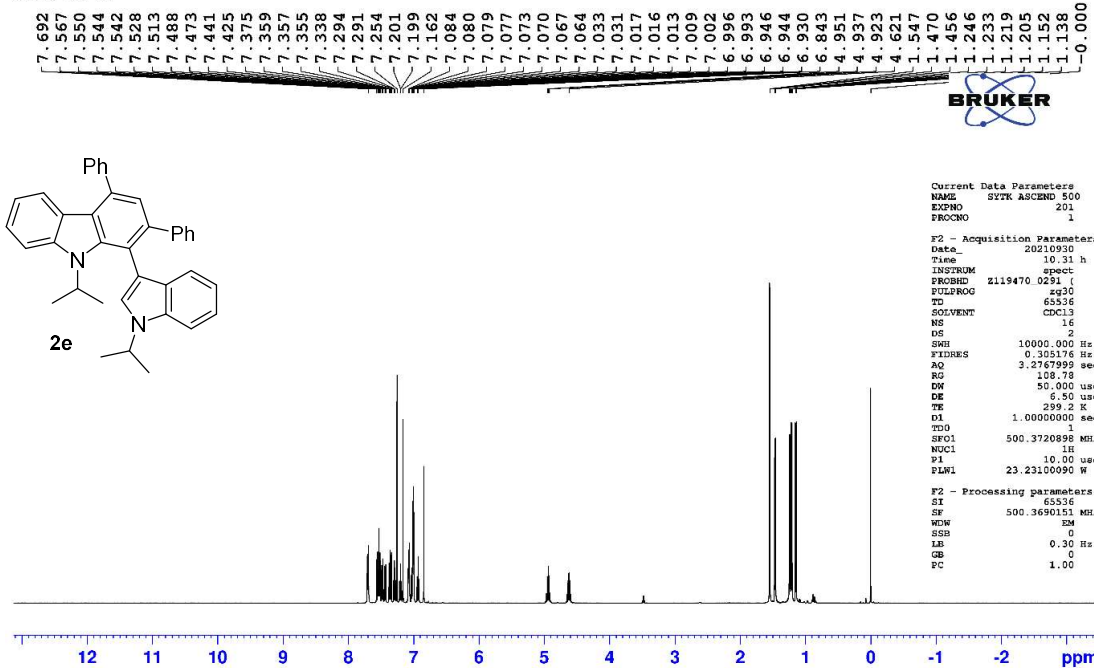

SYTK-49 B

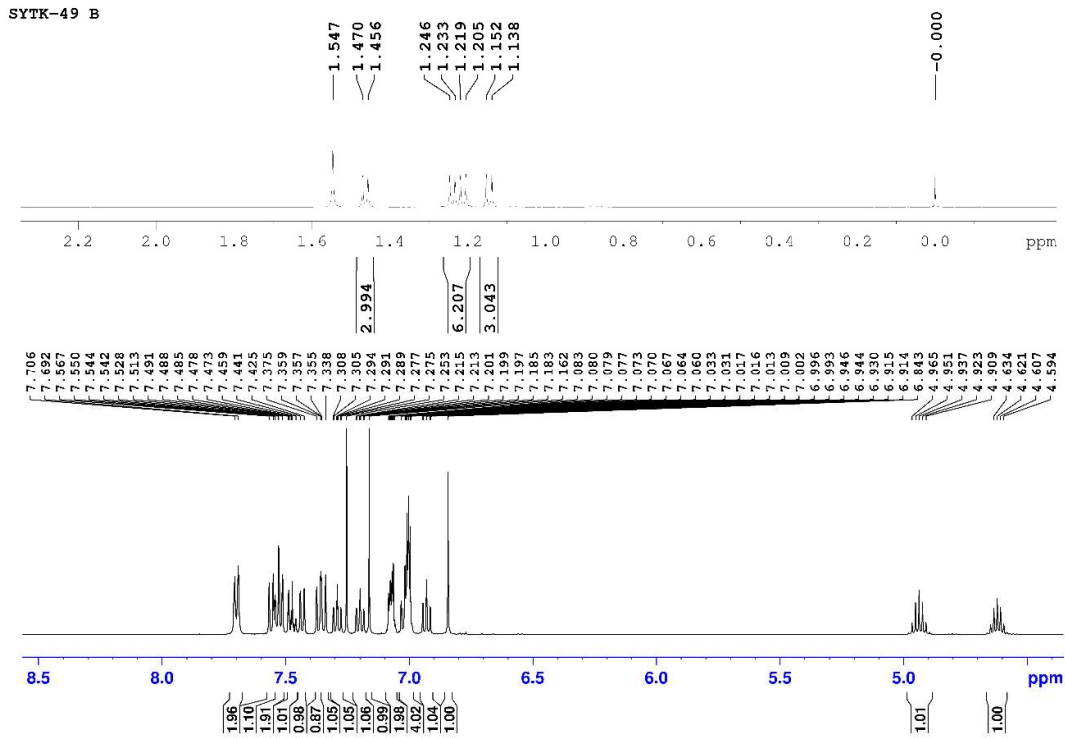

SYTK-49 b

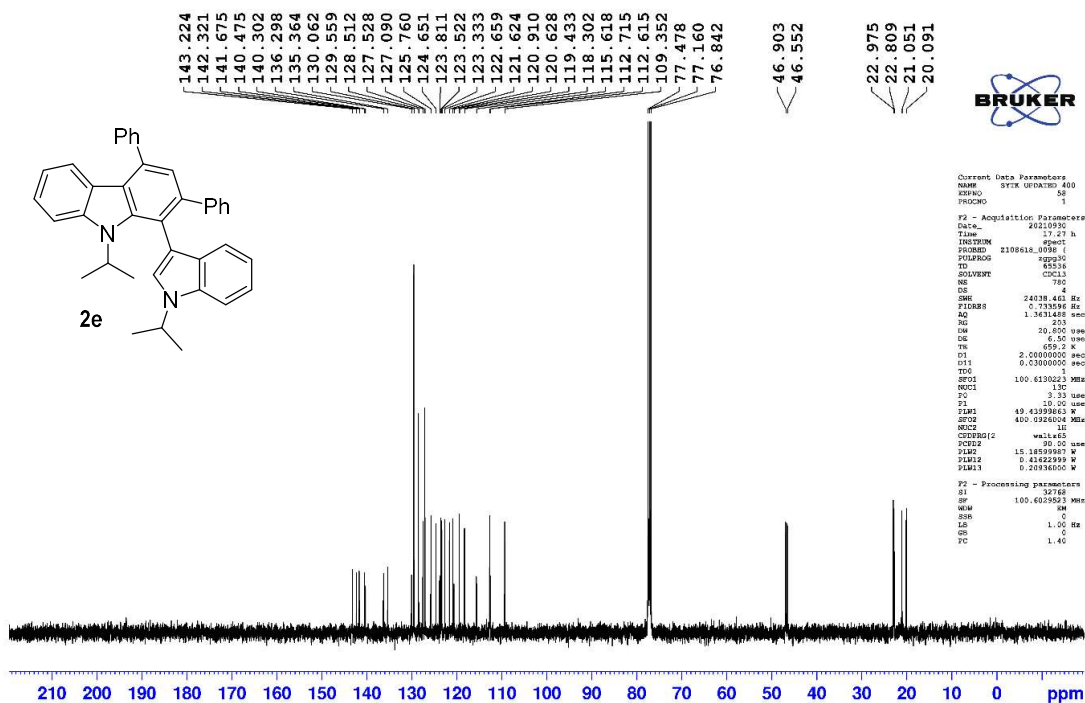

SYTK-49 b

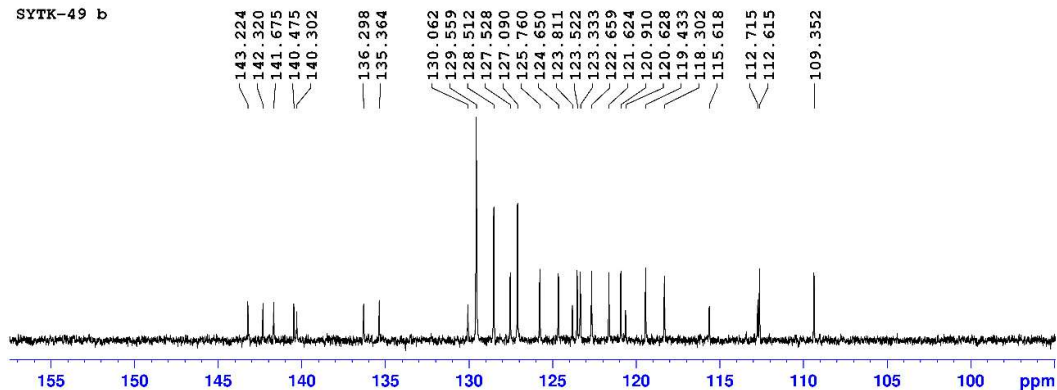



NH CARB

8.236  
8.138  
7.779  
7.776  
7.762  
7.612  
7.596  
7.569  
7.555  
7.540  
7.503  
7.488  
7.474  
7.464  
7.328  
7.323  
7.305  
7.300  
7.291  
7.285  
7.281  
7.276  
7.261  
7.250  
7.176  
7.169  
7.159  
7.147  
7.138  
7.133  
7.124  
7.007  
7.005  
6.991  
6.977  
6.975  
6.884  
6.879

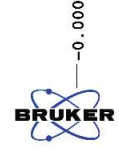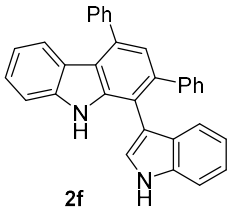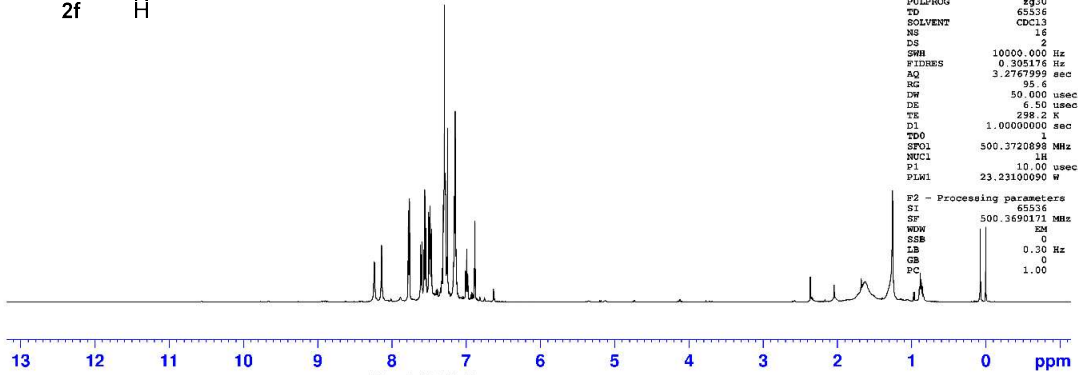

Current Data Parameters  
NAME SYTK ASCEND 500  
EXPNO 203  
PROCNO 1

F2 - Acquisition Parameters  
Date\_ 20211004  
Time 11.34 h  
INSTRUM spect  
PROBHD z119470\_0291 |  
PULPROG zg30  
TD 65536  
SOLVENT CDCl3  
NS 16  
DS 2  
SWH 10000.000 Hz  
FIDRES 0.305176 Hz  
AQ 3.2767995 sec  
RG 95.6  
DW 50.000 usec  
DE 6.50 usec  
TE 298.2 K  
D1 1.00000000 sec  
YD0  
SFO1 500.3720898 MHz  
NUC1 1H  
P1 10.00 usec  
PLM1 23.23100090 W

F2 - Processing parameters  
SI 65536  
SF 500.3690171 MHz  
WDW EM  
SSB 0  
LB 0.30 Hz  
GB 0  
PC 1.00

NH CARB

8.236  
8.138  
7.779  
7.776  
7.762  
7.612  
7.596  
7.569  
7.555  
7.540  
7.503  
7.488  
7.474  
7.464  
7.328  
7.323  
7.305  
7.300  
7.291  
7.285  
7.281  
7.276  
7.261  
7.249  
7.176  
7.168  
7.159  
7.147  
7.137  
7.133  
7.124  
7.007  
7.005  
6.991  
6.977  
6.975  
6.884  
6.879

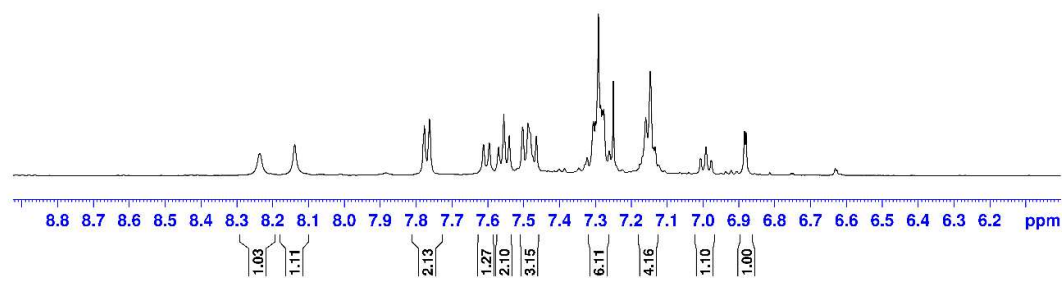

SYTK- NH-CARB

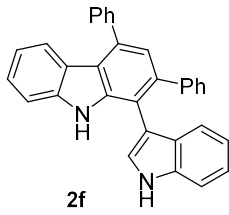

142.258  
141.288  
140.220  
140.022  
139.389  
136.501  
136.201  
130.014  
129.491  
128.568  
127.790  
127.661  
127.154  
126.320  
125.645  
124.818  
123.849  
123.253  
122.555  
120.437  
120.256  
119.678  
119.109  
114.925  
112.244  
111.651  
110.645  
77.160  
76.843

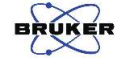

Current Data Parameters  
NAME SYTK\_UPDATE\_000  
EXPNO 60  
PROCNO 1  
F2 - Acquisition Parameters  
Date\_ 20211005  
Time 14.11 h  
INSTRUM spect  
PULPROG zgpg30  
PRGNAME zgpg30  
TD 65536  
SOLVENT CDCl3  
NS 1300  
DS 4  
SWH 24050.464 Hz  
FIDRES 0.733296 Hz  
AQ 1.2631069 sec  
RG 675  
RW 20.810 usec  
CW 6.00 usec  
TE 300.2 K  
D1 2.0000000 sec  
D11 0.0300000 sec  
YTD  
SFO1 100.6130213 MHz  
NUC1 13C  
P1 3.75 usec  
P2 10.00 usec  
F1A1 49.8395863 MHz  
SFO2 400.0924004 MHz  
NUC2 1H  
CDEPRG2 waltz165  
CDD2 90.00 usec  
FIR2 15.1859987 MHz  
FIR12 0.8102299 MHz  
FIR13 0.2091600 MHz  
F2 - Processing parameters  
SI 32768  
SF 100.6029111 MHz  
WDW EM  
SSB 0  
LR 1.00 Hz  
GB 0  
PC 1.40

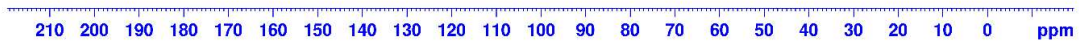

SYTK- NH-CARB

142.258  
141.287  
140.220  
140.022  
139.389  
136.501  
136.201  
130.014  
129.491  
128.568  
127.790  
127.661  
127.154  
126.320  
125.645  
124.818  
123.849  
122.555  
120.437  
120.256  
119.678  
119.109  
114.925  
112.244  
111.651  
110.645

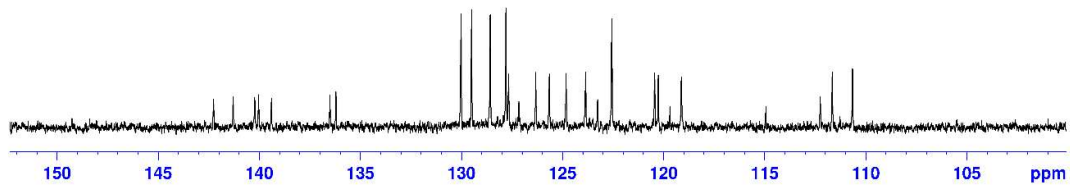

SYTK-Me C

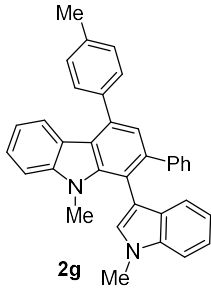

7.727  
7.724  
7.710  
7.554  
7.552  
7.538  
7.523  
7.499  
7.496  
7.493  
7.482  
7.477  
7.467  
7.377  
7.361  
7.349  
7.346  
7.344  
7.271  
7.269  
7.258  
7.241  
7.179  
7.092  
7.090  
7.076  
7.062  
7.060  
7.053  
7.037  
6.985  
6.983  
6.969  
6.954  
6.953  
6.885  
6.869  
6.734  
3.755  
2.238  
2.230  
1.560

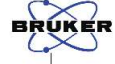

Current Data Parameters  
 NAME SYTK UPDATED 500  
 EXPNO 180  
 PROCNO 1

F2 - Acquisition Parameters  
 Date\_ 20221114  
 Time 10.51 h  
 INSTRUM spect  
 PROBHD E109128\_0042 ( )  
 PULPROG zg30  
 TO 65336  
 SOLVENT CDCl3  
 NS 16  
 DS 2  
 SWH 10000.000 Hz  
 FIDRES 0.305176 Hz  
 AQ 3.276799 s  
 RG 456  
 DM 50.000 usec  
 DE 13.04 usec  
 TE 296.2 K  
 D1 1.00000000 sec  
 TDO 1  
 SFO1 500.1830886 MHz  
 NUC1 1H  
 PD 5.00 usec  
 P1 15.00 usec  
 PLW1 4.8467985 w

F2 - Processing parameters  
 SI 65336  
 SF 500.1800131 MHz  
 WDW EM  
 SSB 0  
 LB 0.30 Hz  
 GB 0  
 FC 1.00

13 12 11 10 9 8 7 6 5 4 3 2 1 0 ppm

2.08  
2.13  
3.17  
1.16  
1.07  
1.05  
1.19  
2.04  
1.13  
2.11  
1.00

3.17  
3.22  
3.24

SYTK-Me C

7.727  
7.724  
7.710  
7.555  
7.552  
7.538  
7.523  
7.499  
7.496  
7.494  
7.482  
7.477  
7.467  
7.377  
7.361  
7.349  
7.346  
7.344  
7.271  
7.269  
7.258  
7.241  
7.179  
7.092  
7.090  
7.076  
7.062  
7.060  
7.053  
7.037  
6.985  
6.983  
6.969  
6.955  
6.953  
6.885  
6.869  
6.734

8.5 8.0 7.5 7.0 6.5 6.0 ppm

1.97  
2.04  
2.05  
2.94  
0.80  
1.03  
0.93  
1.10  
1.80  
1.06  
2.02  
1.00

SYTK-Me-C

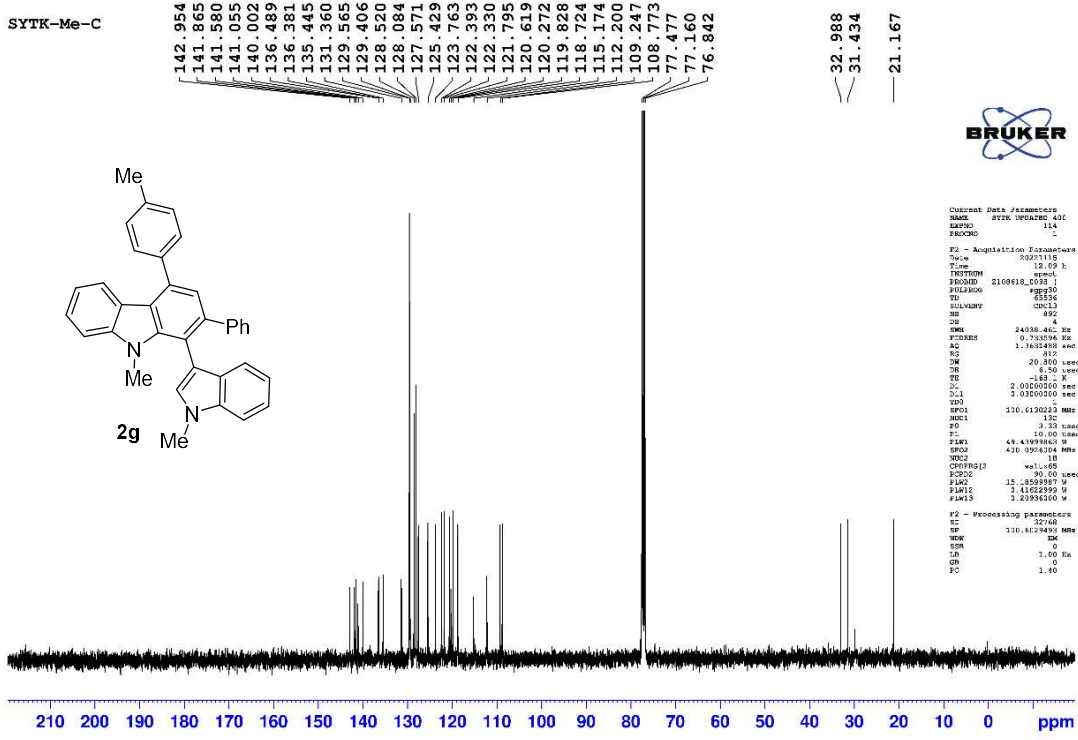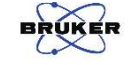

```

CURRENT DATA PARAMETERS
NAME      SYTK-UPGRAB-0401
EXPNO    1
PROCNO   1
F2 - Acquisition Parameters
Date_    20231115
Time     12:09:31
INSTRUM  spect
PROBHD   Z108418-QNP5
PULPROG  zgpg30
TD        65536
SOLVENT  CDCl3
NS       4092
DS        4
SWH       24000 Hz
FIDRES    0.733094 Hz
AQ         1.9635800 sec
RG         812
OR        20.800 usec
DE        6.50 usec
TE        300.2 K
DQ        2.0000000 sec
DELTA     3.0000000 sec
SFO1      100.6130213 MHz
SFO2      132.2445132 MHz
PC        3.23 usec
P1        10.00 usec
P2        48.4199961 usec
SFO3      400.0994004 MHz
NUC1      13C
CPDPRG2  waltz16b
PCPD2     90.00 usec
PL1       15.3599987 usec
PL2       3.4100000 usec
PL3       3.0000000 usec
F4P13     1.0000000 usec
F2 - Processing parameters
SI        32768
SF        100.6132480 MHz
WDW       EM
SSB       0
GB        0
PC        1.00 usec
  
```

SYTK-Me-C

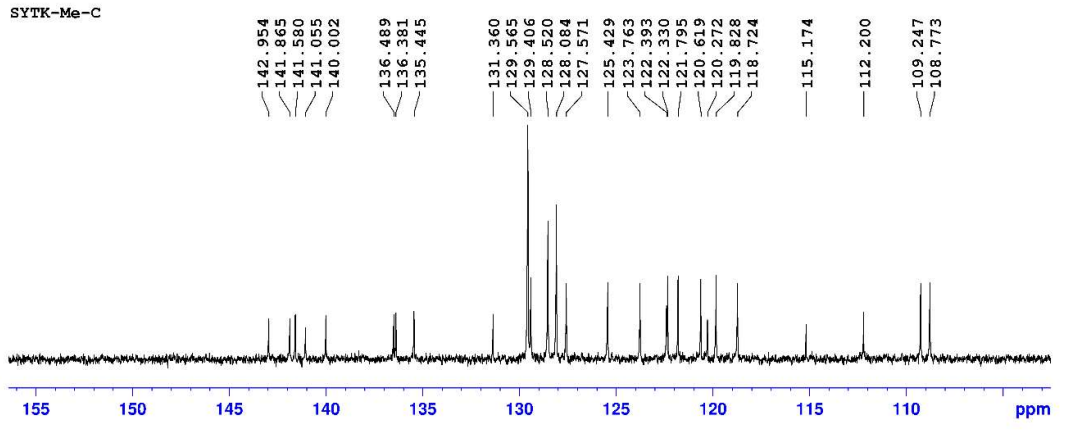

SYTK-33

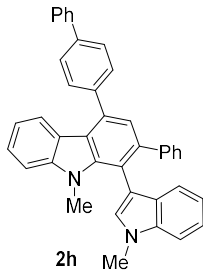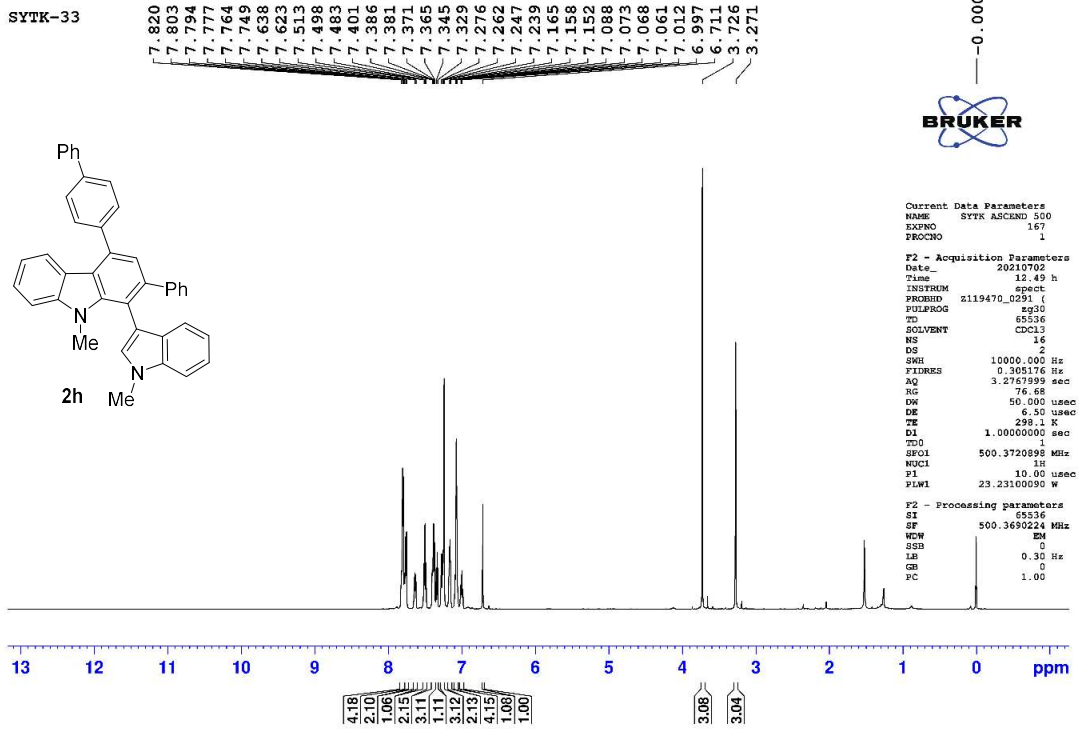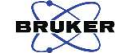

Current Data Parameters  
 NAME SYTK ASCND 500  
 EXPNO 167  
 PROCNO 1

F2 - Acquisition Parameters  
 Date\_ 20210702  
 Time 12.49 h  
 INSTRUM spect  
 PROCID z119470\_0291 (1  
 PULPROG zgpg  
 TD 65536  
 SOLVENT CDCl3  
 NS 16  
 DS 2  
 SWH 10000.000 Hz  
 FIDRES 0.305176 Hz  
 AQ 3.2767999 sec  
 RG 76.68  
 DW 50.000 usec  
 DE 6.50 usec  
 TE 299.1 K  
 D1 1.00000000 sec  
 TD0 1  
 SFO1 500.3720898 MHz  
 NUC1 1H  
 P1 10.00 usec  
 PLW1 23.23100030 W

F2 - Processing parameters  
 SI 65536  
 SF 500.3690224 MHz  
 WDW EM  
 SSB 0  
 LB 0.30 Hz  
 GB 0  
 PC 1.00

SYTK-33

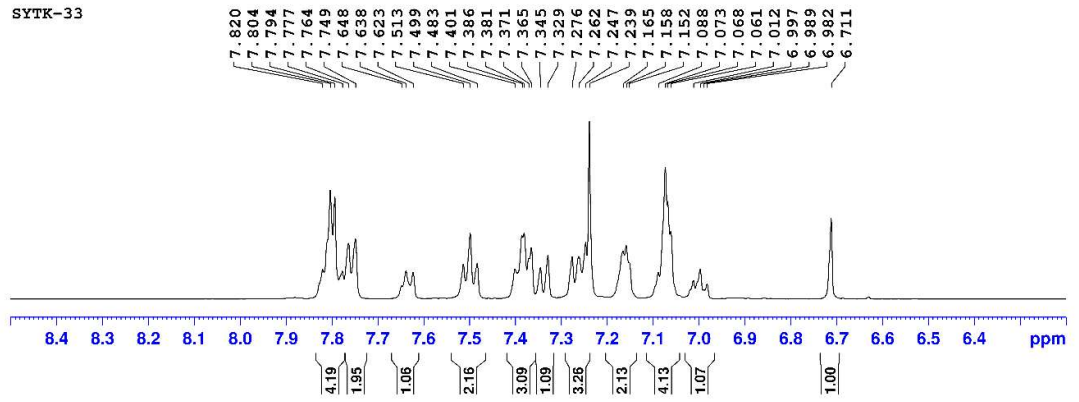

SYTK-33

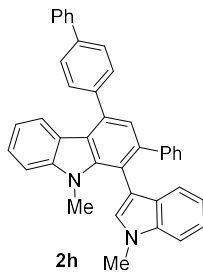

142.985  
141.945  
141.051  
140.503  
140.345  
136.351  
136.074  
131.201  
129.984  
129.702  
129.451  
128.990  
127.477  
127.318  
127.270  
127.210  
126.001  
125.568  
123.661  
122.431  
122.334  
121.830  
120.553  
120.386  
119.847  
118.809  
115.327  
112.043  
109.268  
108.856  
77.160  
76.842

32.938  
31.503

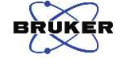

Current Data Parameters  
NAME: SYTK-33  
EXPNO: 37  
PROCNO: 3  
F2 - Acquisition Parameters  
Date\_: 20120905  
Time: 11.50 h  
INSTRUM: spect  
PROBHD: z106z18 0508 1  
PULPROG: zgpg30  
TD: 65536  
SOLVENT: CDCl3  
NS: 512  
DS: 4  
SWH: 24036.462 Hz  
F2DRBS: 0.73338 Hz  
AQ: 1.3631660 sec  
RG: 812  
RW: 29.900 usec  
TE: 6.50 usec  
DE: 709.4 K  
D1: 2.0000000 sec  
D11: 0.0300000 sec  
TD0: 100.613022 MHz  
NUC1: 13C  
PC: 3.33 usec  
PT: 10.00 usec  
P1M1: 49.6399862 W  
SFO2: 400.0526004 MHz  
NUC2: 1H  
CPDPRG2: waltz16  
SFO2: 80.00 usec  
P1M2: 15.2859987 W  
P1M3: 0.2162399 W  
P1M4: 0.2093600 W  
F2 - Processing parameters  
SI: 32768  
SF: 100.6282620 MHz  
WDW: EM  
SSP: 0  
LB: 1.00 Hz  
GB: 0  
PC: 1.00

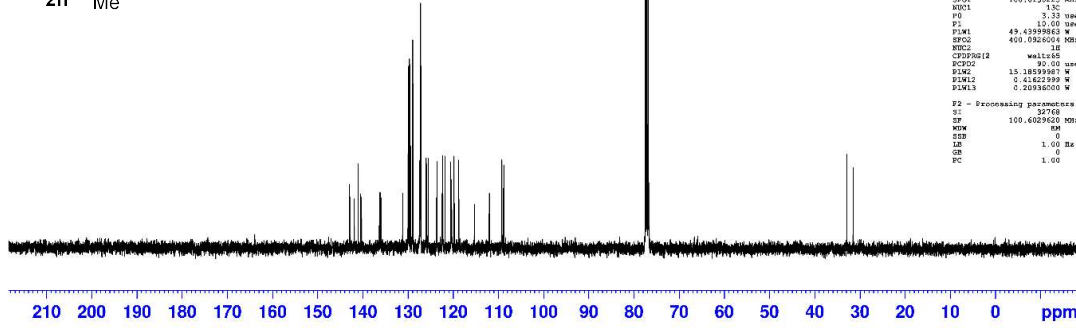

SYTK-33

142.985  
141.945  
141.051  
140.503  
140.345  
136.351  
136.074  
131.201  
129.984  
129.702  
129.451  
128.990  
127.477  
127.318  
127.270  
127.210  
126.001  
125.568  
123.662  
122.431  
122.334  
121.830  
120.553  
120.386  
119.848  
118.809  
115.327  
112.043  
109.268  
108.856

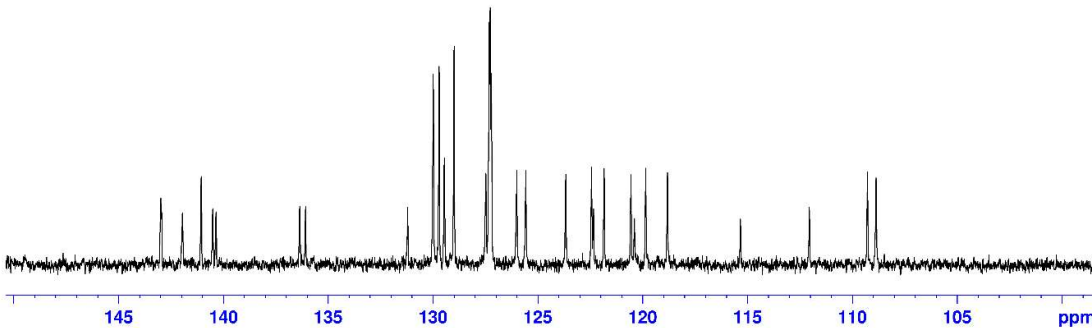

SYTK-02-476-P2

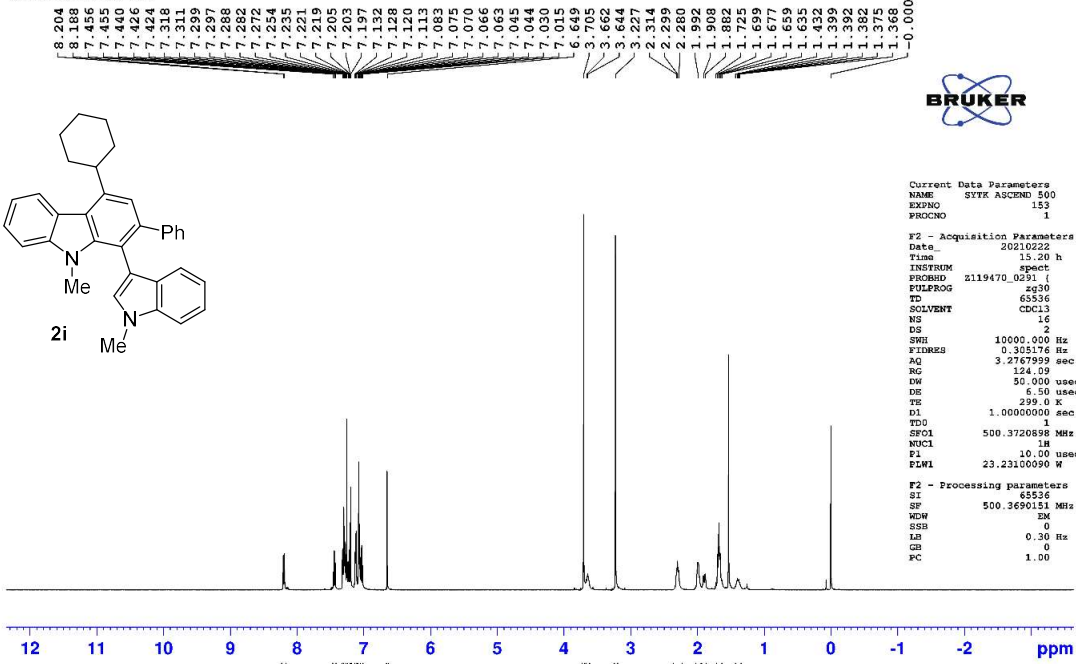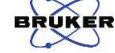

Current Data Parameters  
 NAME SYTK ASCEND 500  
 EXPNO 153  
 PROCNO 1

F2 - Acquisition Parameters  
 Date\_ 20210222  
 Time 15.20 h  
 INSTRUM spect  
 FREQSHD 2119470.0291 i  
 FULPROG zg30  
 TD 65536  
 SOLVENT CDCl3  
 NS 16  
 DS 2  
 SFE 10000.000 Hz  
 FIDRES 0.305176 Hz  
 AQ 3.2767959 sec  
 RQ 124.09  
 DW 50.000 usec  
 DE 6.30 usec  
 TE 299.0 K  
 D1 1.00000000 sec  
 TDD 1  
 SFO1 500.3720898 MHz  
 NUC1 1H  
 P1 10.00 usec  
 PLW1 23.23100090 W

F2 - Processing parameters  
 SI 65536  
 SF 500.3690151 MHz  
 WDW EM  
 SSB 0  
 LB 0.30 Hz  
 GB 0  
 PC 1.00

SYTK-02-476-P2

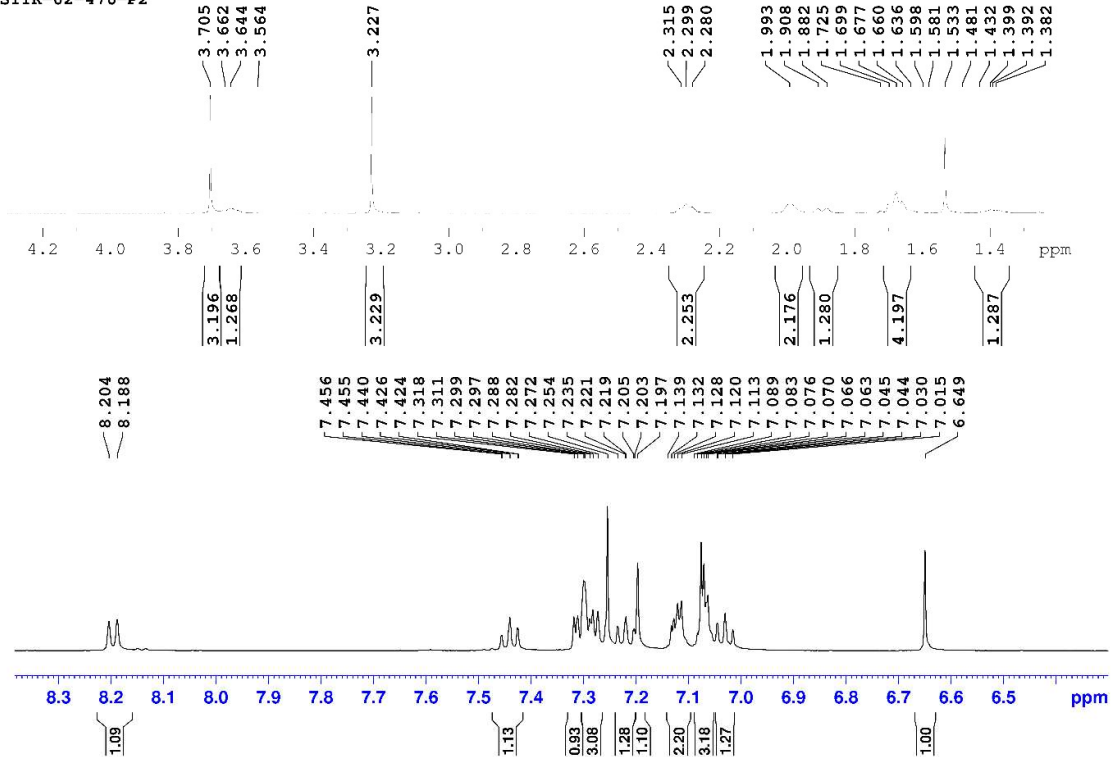

SYTK-02-476-P2

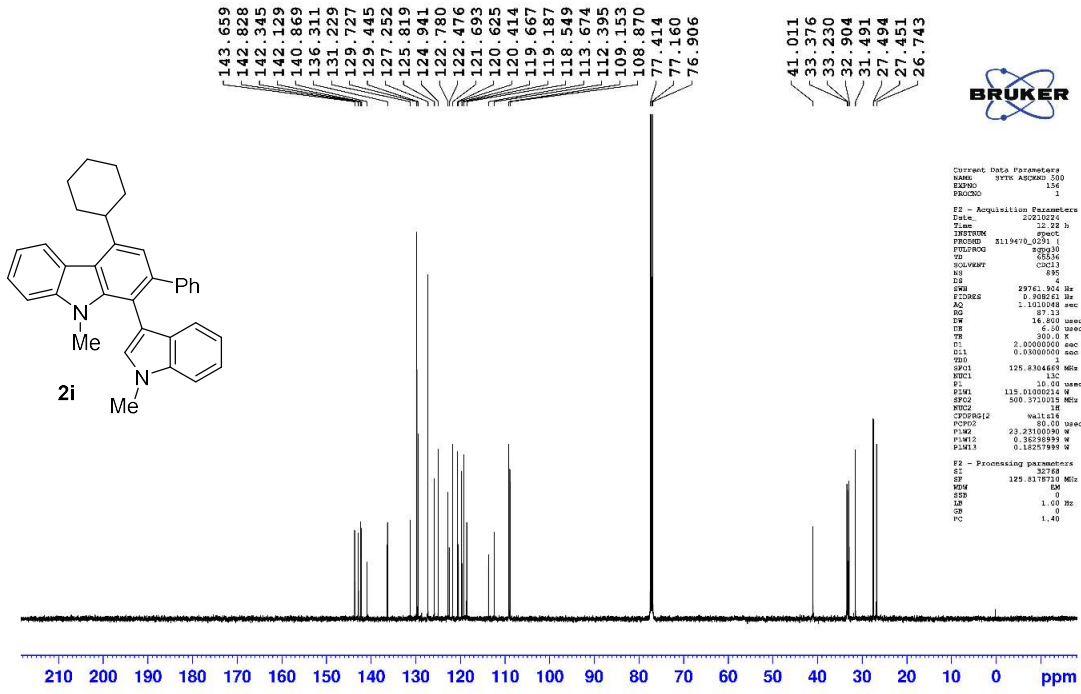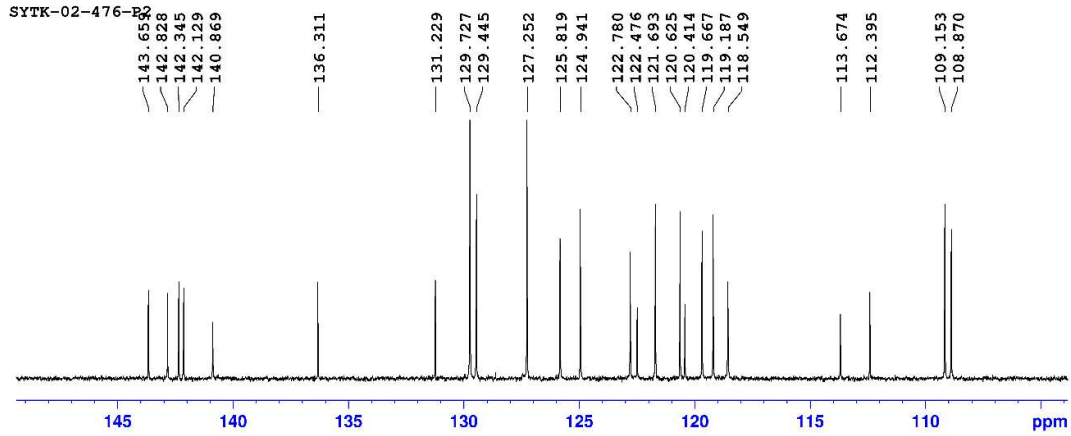



SYTK-02-Cyp-1

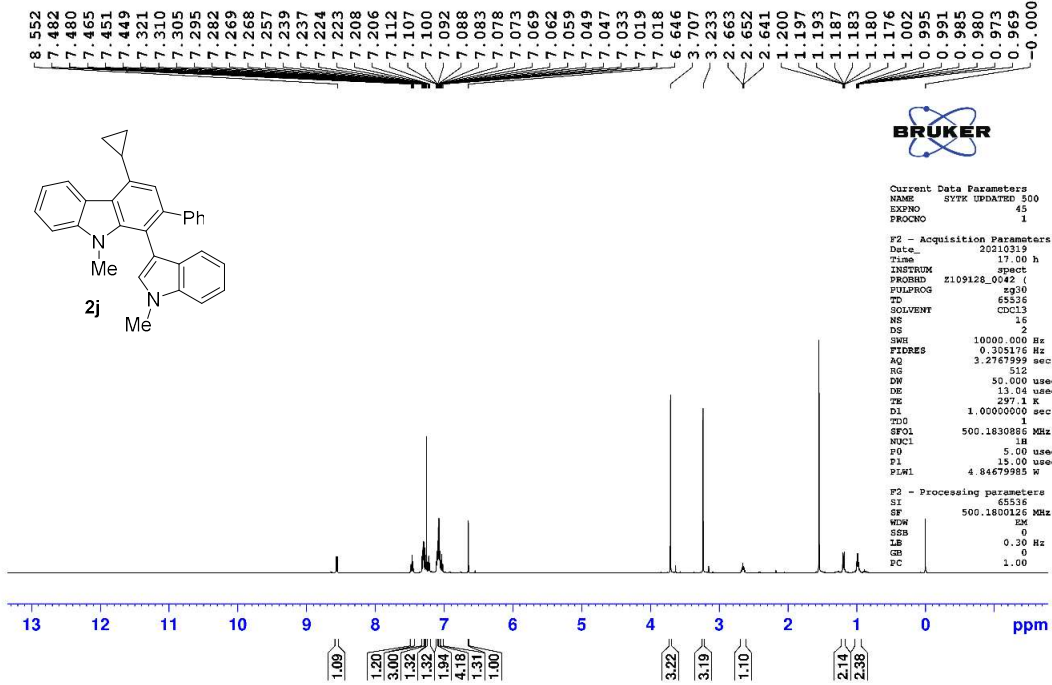

SYTK-02-Cyp-1

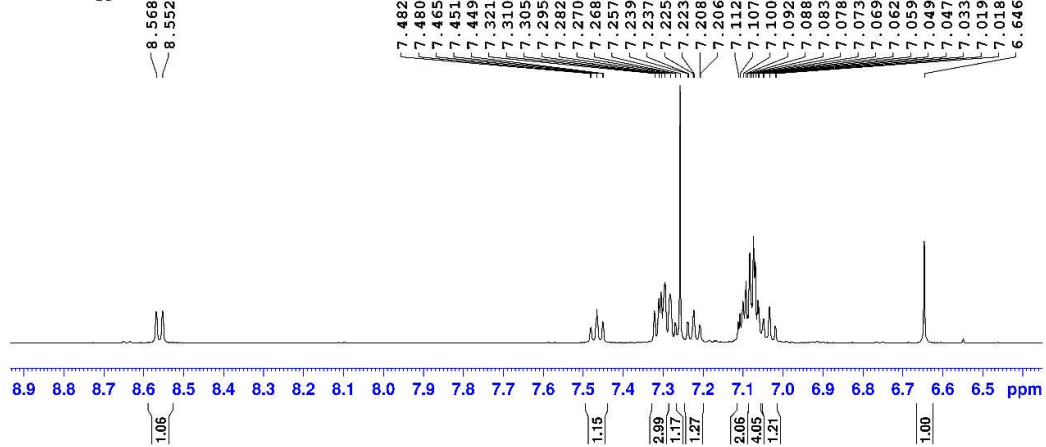

SYTK-02-CYP-1

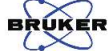

```

Current Data Parameters
NAME: SYTK_02CYP-1_400
EXPNO: 2
PROCNO: 1
F2 - Acquisition Parameters
Date_: 20210302
Time: 16.04.5
INSTRUM: spect
PROBHD: 1HBOEX-50098 (
PULPROG: zgpg30
TD: 65536
SOLVENT: CDCl3
NS: 1024
DS: 4
SWH: 24038.461 MHz
FIDRES: 0.33356 Hz
AQ: 1.3651488 sec
RG: 445
DM: 20.800 usec
DE: 8.50 usec
TE: 499.4 K
D1: 2.0000000 sec
d11: 0.0300000 sec
SFO1: 100.6130233 MHz
NUC1: 13C
P1: 130
PC: 3.33 usec
PL1: 0.00 usec
PL12: 49.4399863 dB
SFO2: 400.2610054 MHz
NUC2: 1H
PCPD2: 15.00 usec
PL2: 15.00 usec
PL12: 0.4162399 dB
PL13: 0.2050000 dB
F2 - Processing parameters
SI: 32768
SF: 100.6074098 MHz
WDW: EM
SSB: 0
LB: 1.00 Hz
GB: 0
PC: 1.40
  
```

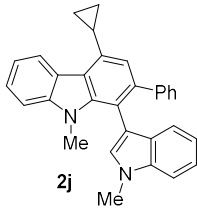

143.381  
142.736  
141.883  
140.631  
136.610  
136.301  
131.214  
129.684  
129.415  
127.270  
125.868  
125.141  
123.164  
123.038  
122.570  
121.711  
120.541  
120.339  
119.706  
119.053  
114.127  
112.196  
109.178  
108.684  
77.477  
77.160  
76.842

32.931  
31.399

15.053  
6.996  
6.940

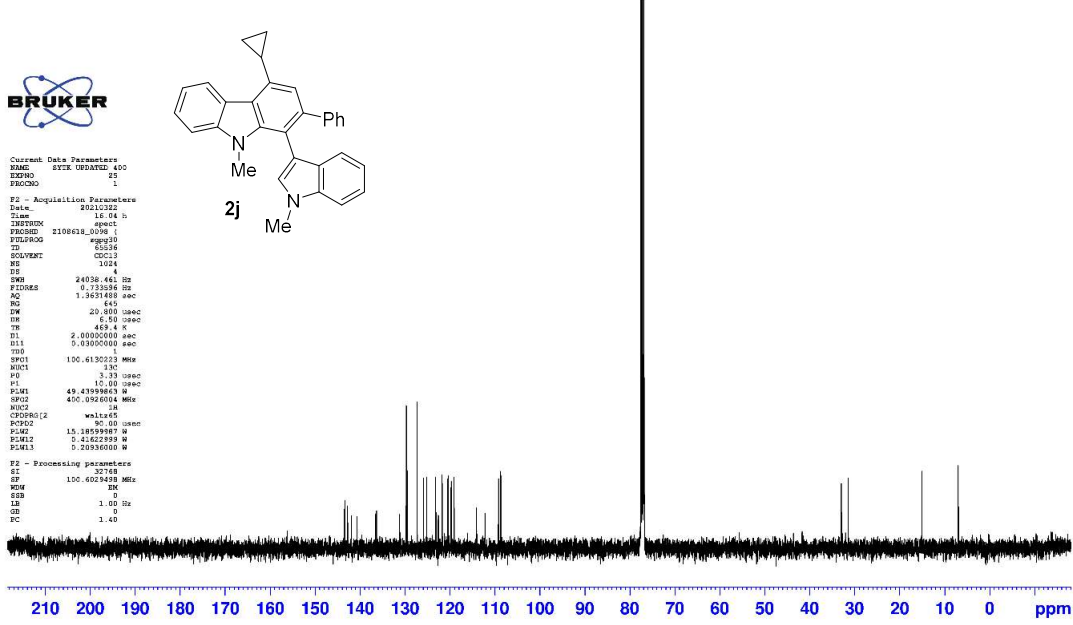

SYTK-02-CYP-1

143.381  
142.736  
141.883  
140.631  
136.610  
136.301  
131.214  
129.684  
129.415  
127.270  
125.868  
125.141  
123.164  
123.038  
122.570  
121.711  
120.541  
120.339  
119.706  
119.053  
114.127  
112.196  
109.178  
108.684

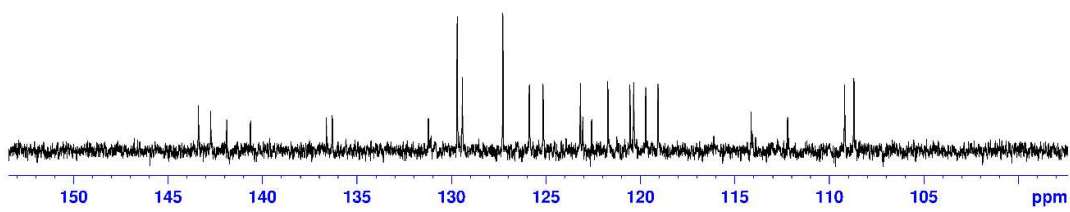

SYAH-Me

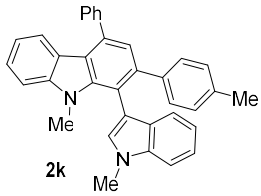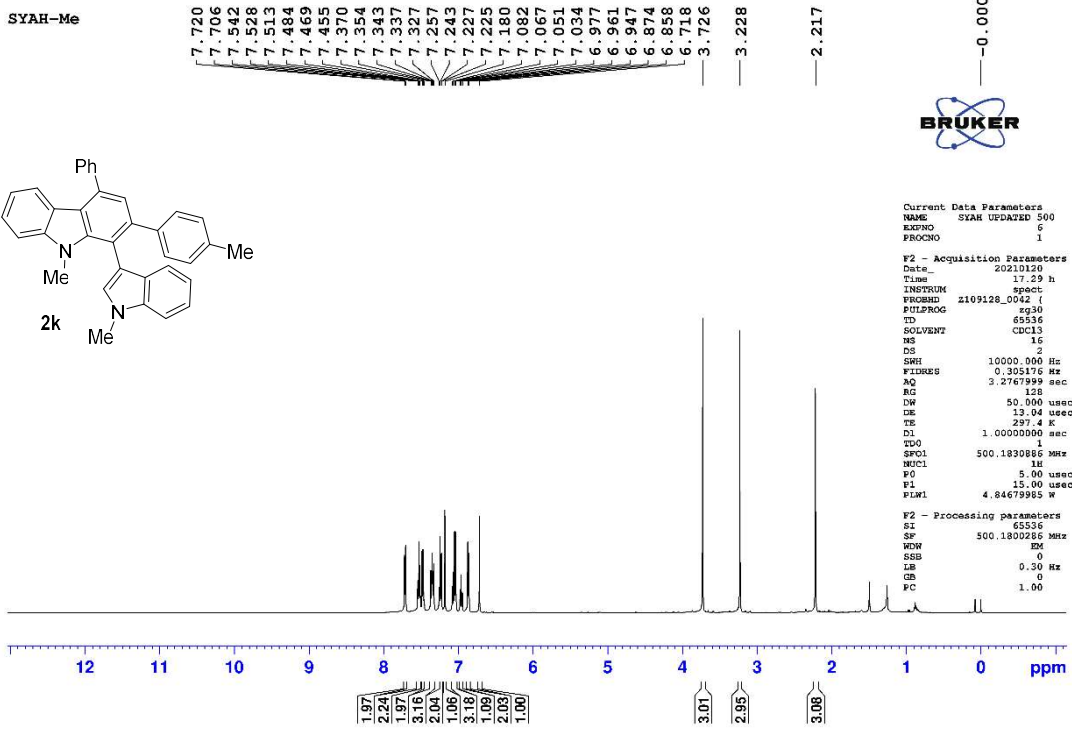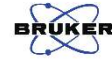

Current Data Parameters  
 NAME: SYAH\_UPDATED\_500  
 EXPNO: 6  
 PROCNO: 1  
 F2 - Acquisition Parameters  
 Date\_: 20210120  
 Time: 17.29 h  
 INSTRUM: spect  
 FREQID: z109128\_0042 f  
 PULPROG: zg30  
 TD: 65536  
 SOLVENT: CDCl3  
 NS: 16  
 DS: 2  
 SSB: 0  
 RBW: 10000.000 Hz  
 FIDRES: 0.305176 Hz  
 AQ: 3.2767999 sec  
 RG: 128  
 DW: 50.000 usec  
 DE: 13.04 usec  
 TE: 297.4 K  
 D1: 1.00000000 sec  
 TDO: 1  
 SFO1: 500.1330886 MHz  
 NUC1: 1H  
 P0: 5.00 usec  
 F1: 15.00 usec  
 PLW1: 4.84679985 W  
 F2 - Processing parameters  
 SI: 65536  
 SF: 500.1330886 MHz  
 MDW: 0  
 SSB: 0  
 LB: 0.30 Hz  
 GB: 0  
 PC: 1.00

SYAH-Me

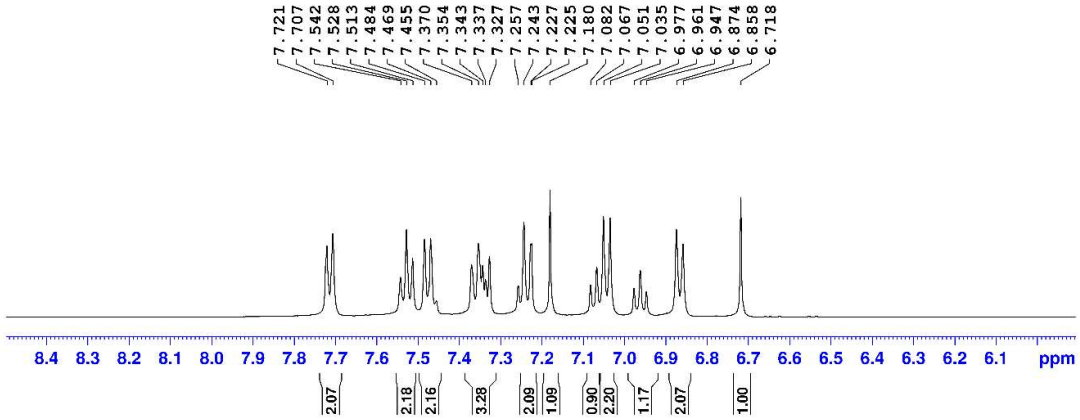

SYAH- Me

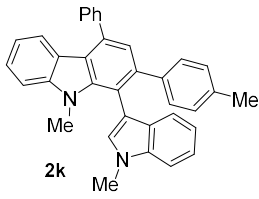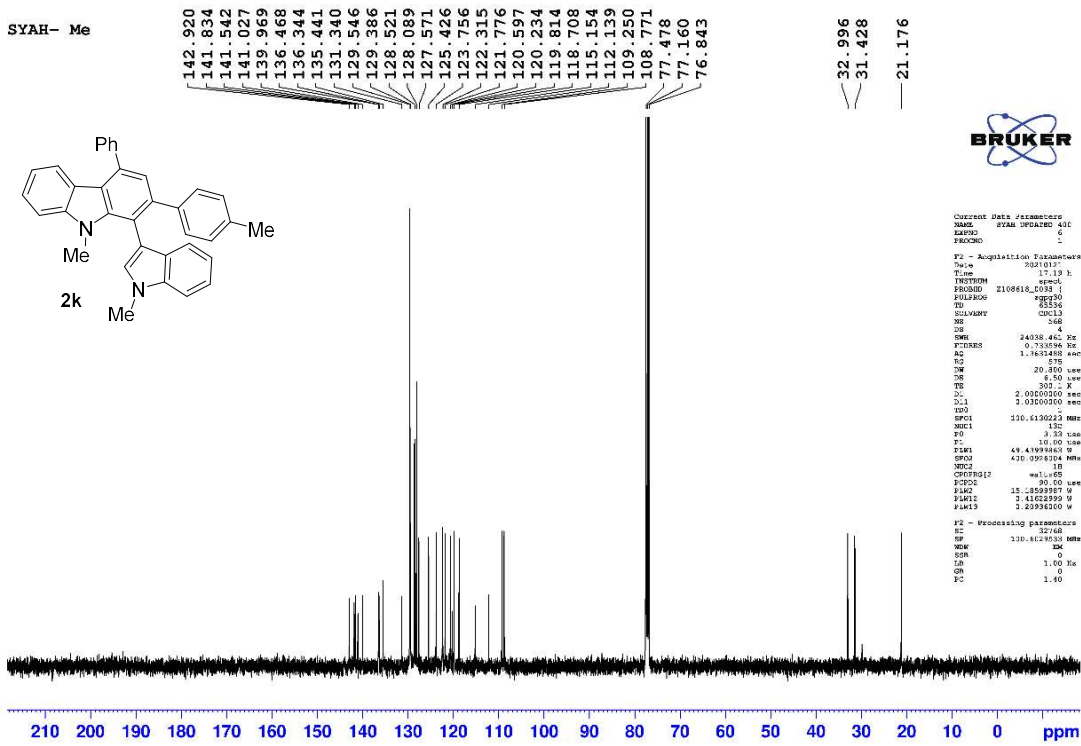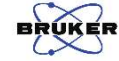

```

=====
NAME      SYAH-UPGRADE-431C
EXPNO     6
PROCNO    1
F2 - Acquisition Parameters
Date_     20210117
Time      17:19:11
INSTRUM   spect
PROBHD    1H0610_05B-1
PULPROG   zgpg30
NUC1       13C
SOLVENT    CDCl3
NS         500
DS         4
SWH        24320.462 Hz
FIDRES     0.35056 Hz
AQ         1.1620495 sec
RG         678
WDW        EM
SSB        0
GB         0
PC         20.000 usec
DE         8.50 usec
TE         300.2 K
DQ         2.0000000 sec
DELTA      3.0000000 sec
VFO1       101.626125 MHz
NUC2       13C
MPC1       152
PC         3.00 usec
P1         10.00 usec
P1A1       48.4199860 W
P1A2       420.0968304 MHz
MPC2       18
CDEPRG2    waltz165
PCPG2      90.00 usec
PLM2       15.2859987 W
PLM1       2.4402899 W
PLM13      2.2395200 W
F2 - Processing parameters
SI         32768
SF         101.626125 MHz
WDW        EM
SSB        0
GB         0
PC         3.00 usec
PC         1.00
  
```

SYAH- Me

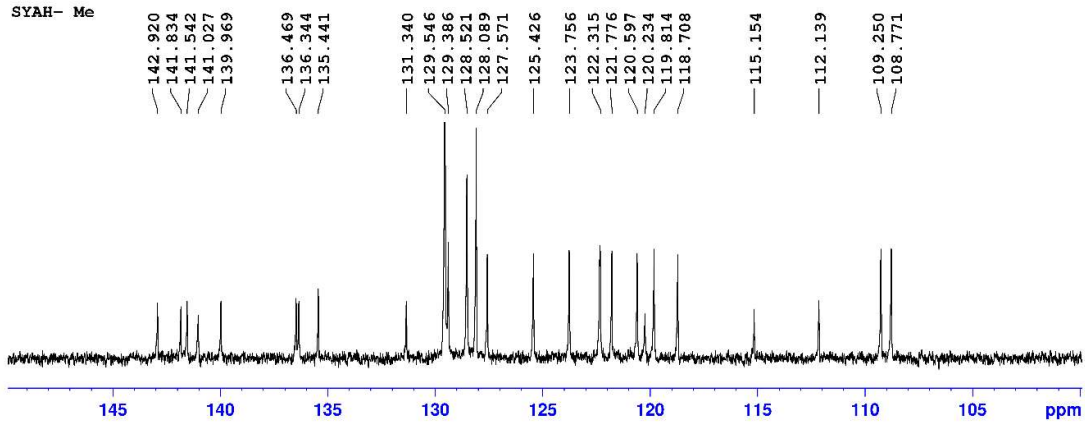

02-254

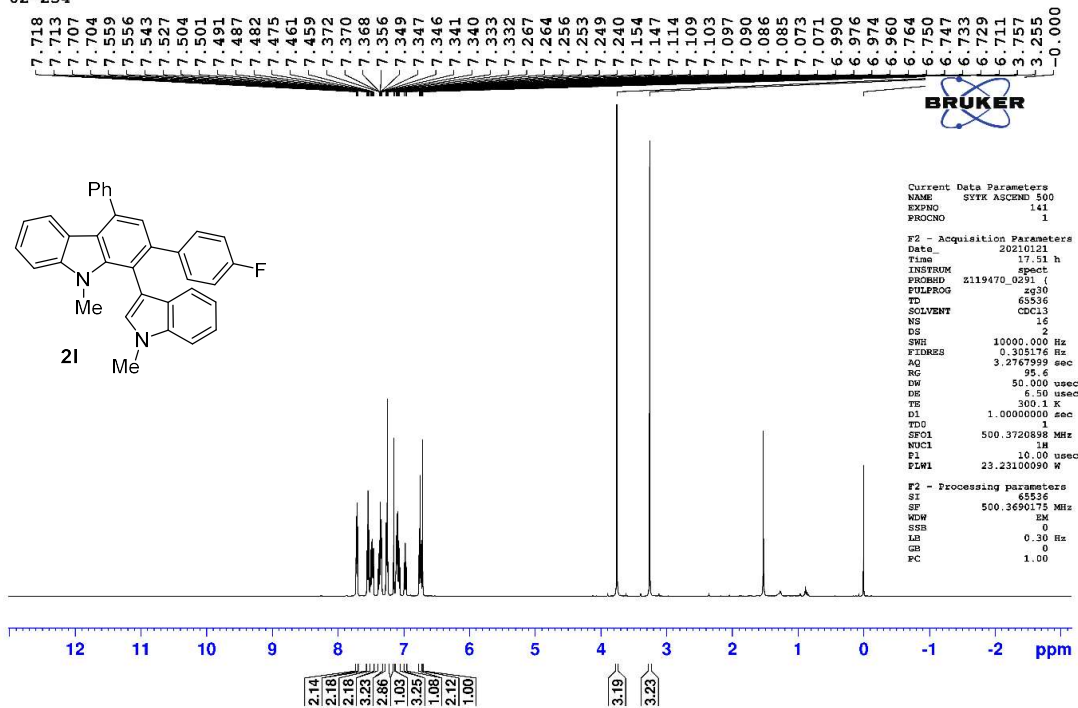

02-254

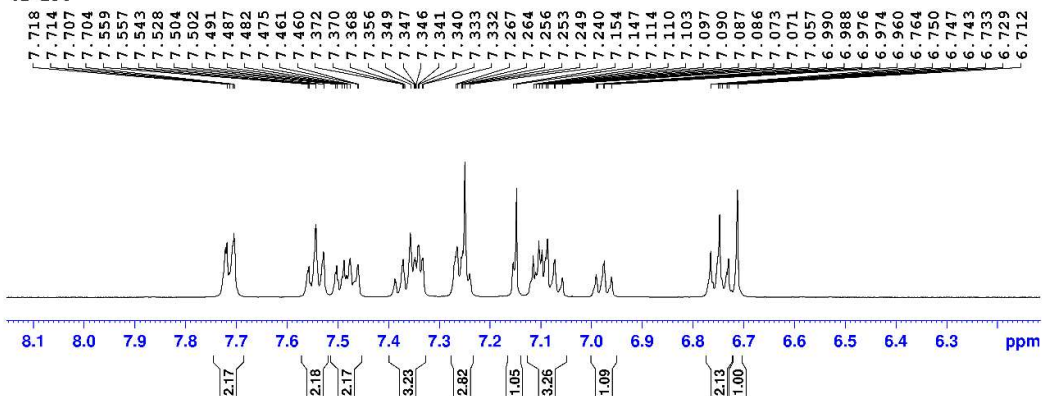

SYTK-02-254

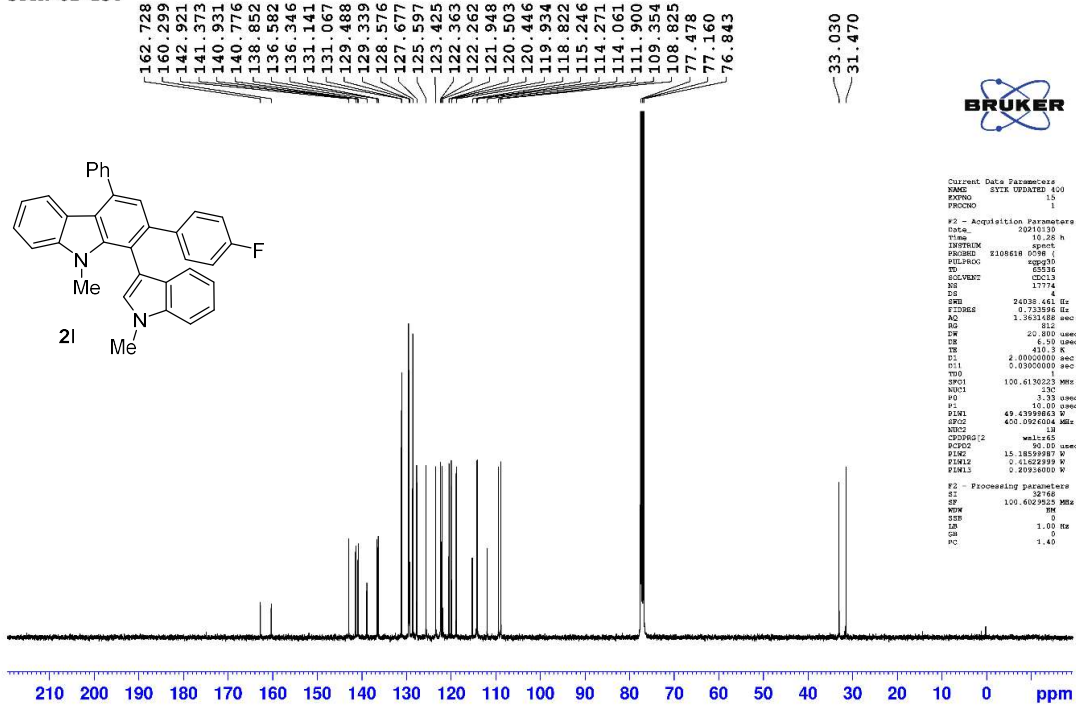

**BRUKER**

```

Current Data Parameters
NAME      SYTK_UPDATE_100
EXPNO    15
PROCNO   1
F2 - Acquisition Parameters
Date_     20210130
Time      10.25 h
INSTRUM  spect
PROBHD   E1081H1 05H 1
PULPROG  zgpg30
TD        65536
SOLVENT  CDCl3
NS        1774
DS        4
SWH       24000.461 Hz
FIDRES    0.733596 Hz
AQ         1.3631680 sec
RG         312
SWH        20.800 umso
DS         6.50 umso
TE         482.3 K
D1         2.00000000 sec
D11        0.03000000 sec
VWD        1
SFO1       100.6130213 MHz
NUC1        13C
PQ         1.33 umso
PI         10.00 umso
P1A1       49.43999863 M
SFO2       400.0924004 MHz
NUC2        1H
CPOBPG2   waltz165
DPCPG2     90.00 umso
P1A2       15.18599987 M
P1M1       0.11422299 M
P1M3       0.20914000 M
F2 - Processing parameters
SI         32768
SF         100.6130213 MHz
WDW        EM
SSB        0
GB         0
PC         1.40
    
```

SYTK-02-454

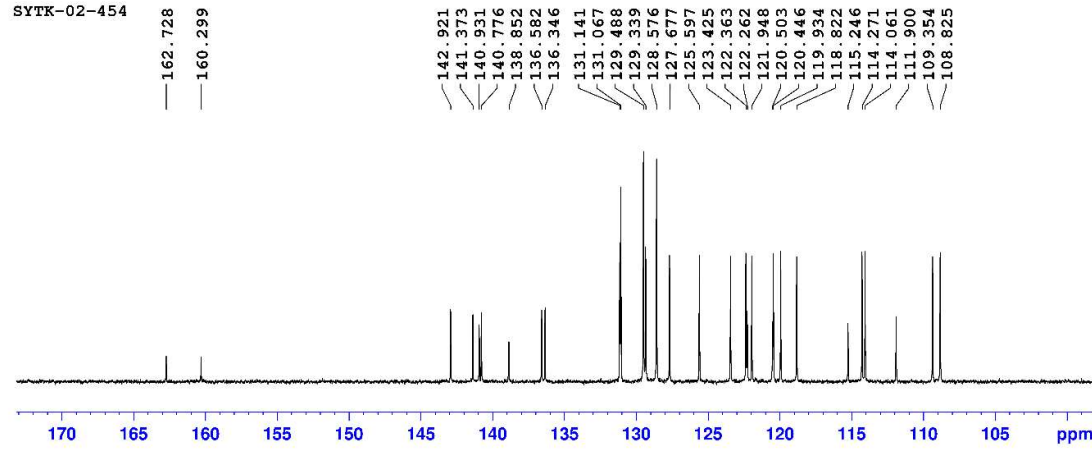

SYTK-37

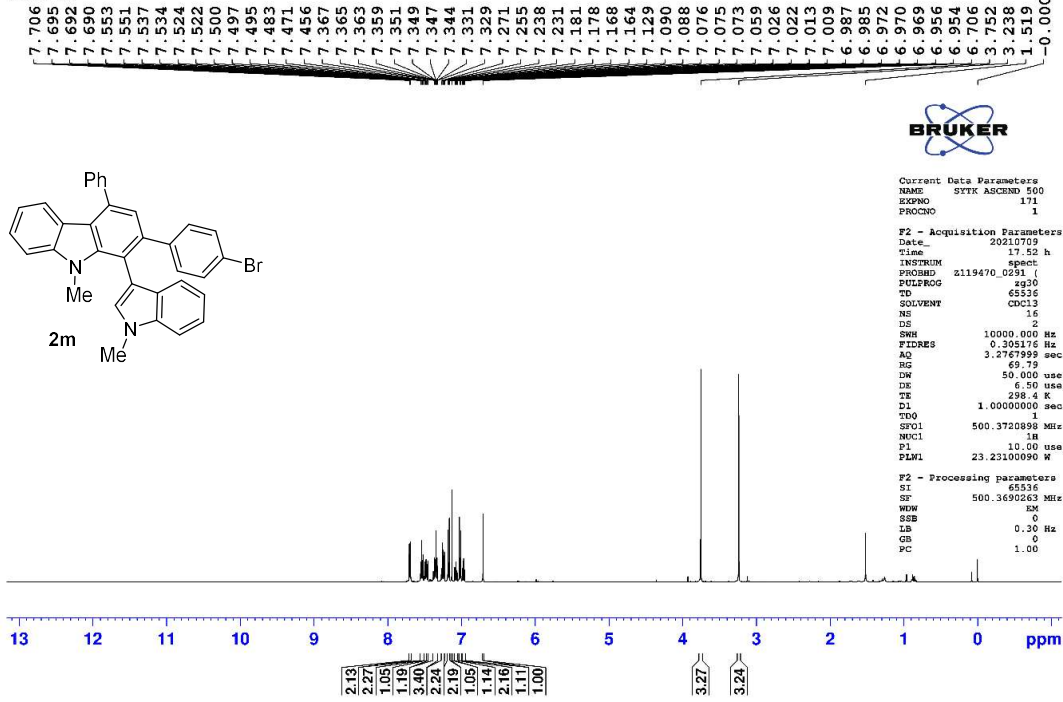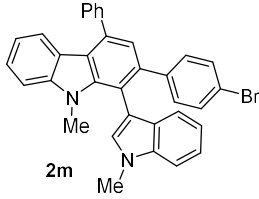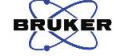

Current Data Parameters  
 NAME SYTK ASCHND 500  
 EXPNO 171  
 PROCNO 1

F2 - Acquisition Parameters  
 Date\_ 20210709  
 Time 17.52 h  
 INSTRUM spect  
 PROBHD 2119470\_0291 ( )  
 PULPROG zg30  
 TD 65536  
 SOLVENT CDCl3  
 NS 16  
 DS 2  
 SWH 10000.000 Hz  
 FIDRES 0.305176 Hz  
 AQ 3.2767999 sec  
 RG 69.79  
 DW 50.000 usec  
 DE 6.50 usec  
 TE 298.4 K  
 D1 1.0000000 sec  
 TDO 1  
 SFO1 500.3720896 MHz  
 NUC1 1H  
 P1 10.00 usec  
 PLWL 23.23100090 W

F2 - Processing parameters  
 SI 65536  
 SF 500.3690263 MHz  
 WDW EM  
 SSB 0  
 LB 0.30 Hz  
 GB 0  
 PC 1.00

SYTK-37

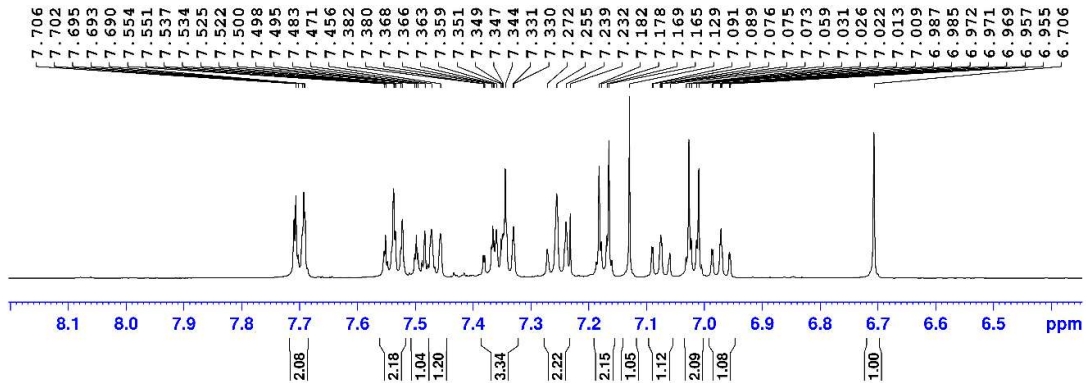

SYTK-37

142.962  
 141.979  
 141.351  
 140.962  
 140.536  
 136.728  
 136.388  
 131.366  
 131.186  
 130.458  
 129.484  
 129.352  
 128.593  
 127.713  
 125.675  
 123.212  
 122.410  
 122.258  
 122.046  
 120.697  
 120.409  
 120.231  
 120.040  
 118.885  
 115.107  
 111.809  
 109.428  
 108.839  
 77.414  
 77.160  
 76.906

33.051  
 31.414

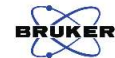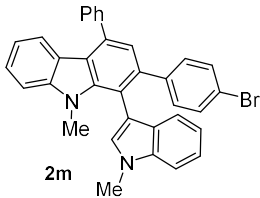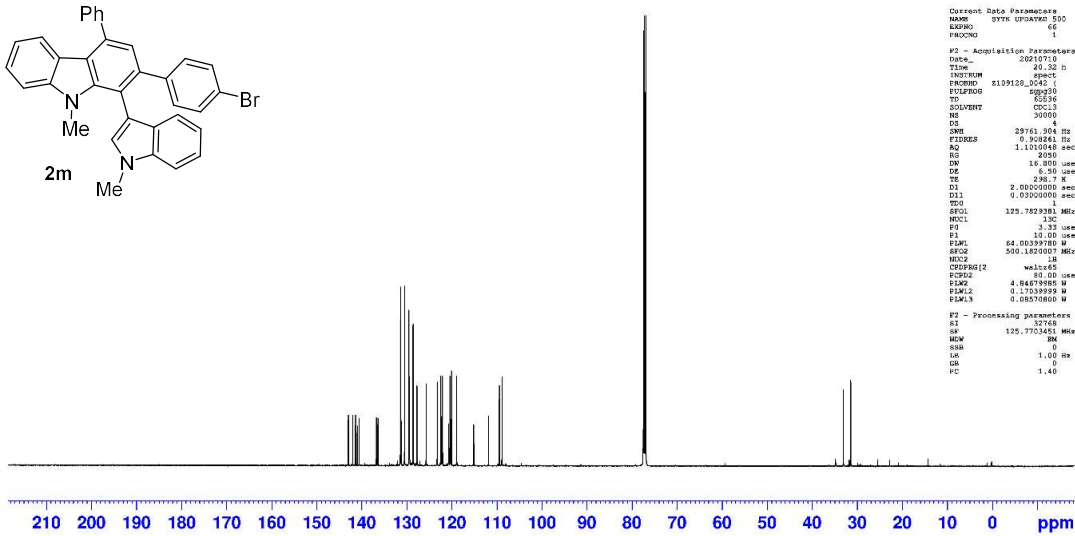

```

Current Data Parameters
NAME      SYTK-37-04-05-200
EXPNO    1
PROCNO   1
F2 - Acquisition Parameters
Date_    20210710
Time     20.32.0
INSTRUM  spect
PROBHD   5mmQNP1H1
PULPROG  zgpg30
TD        65536
SOLVENT  CDCl3
NS        30000
DS        4
SWE       29761.804 Hz
FIDRES   0.302861 Hz
AQ        1.1510048 sec
RG         2020
AQ        16.800 usec
DE         8.50 usec
TE        298.1 K
D1        2.0000000 sec
d11       0.0300000 sec
TPO       1
SFO       125.7629381 MHz
NUC1      13C
P1        3.33 usec
F1        10.00 usec
PLW1     64.0000000 W
SFO2      500.1325000 MHz
NUC2      1H
CPDPRG2  waltz165
SFO3      80.00 usec
PLW2     4.84878885 W
PLW3     0.17038939 W
PLW4     0.08570800 W
F2 - Processing parameters
SI        32768
SF        125.7703451 MHz
WDW       EM
SSB       0
GB        1.00 usec
CB        0
PC        1.40
  
```

SYTK-37

142.962  
 141.979  
 141.351  
 140.962  
 140.536  
 136.728  
 136.388  
 131.366  
 131.186  
 130.458  
 129.484  
 129.352  
 128.593  
 127.713  
 125.675  
 123.212  
 122.410  
 122.259  
 122.046  
 120.697  
 120.409  
 120.251  
 120.040  
 118.885  
 115.107  
 111.809  
 109.428  
 108.839

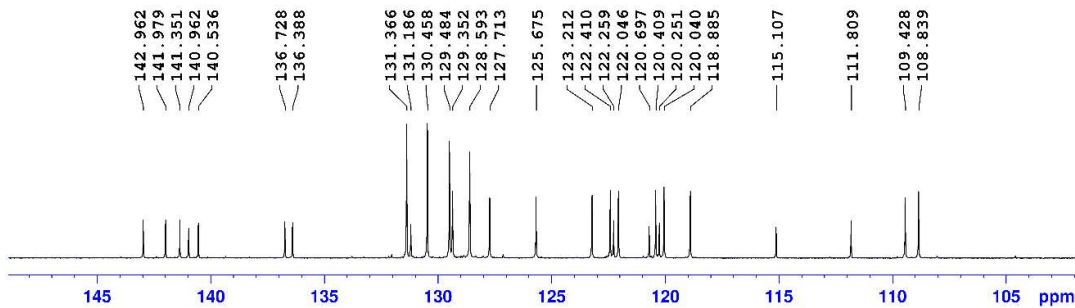



SYAH- CN

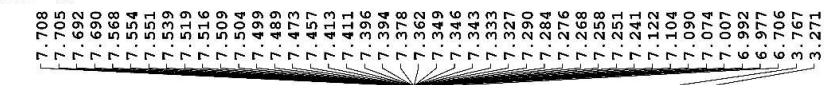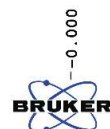

Current Data Parameters  
 NAME SYAH UPDATED 500  
 EXPNO 8  
 PROCNO 1

F2 - Acquisition Parameters  
 Date 20210127  
 Time 16:50 h  
 INSTRUM spect  
 PROBRD z109128\_0042 ( )  
 PULPROG zg30  
 TD 65536  
 SOLVENT CDCl3  
 NS 16  
 DS 2  
 SWH 10000.000 Hz  
 FIDRES 0.335176 Hz  
 AQ 3.2767999 sec  
 RG 203  
 DW 50.000 usec  
 DE 13.04 usec  
 TE 295.1 K  
 D1 1.00000000 sec  
 ZDO 1  
 SFO1 500.1830886 MHz  
 NUC1 1H  
 P0 5.00 usec  
 F1 15.00 usec  
 PLW1 4.84679985 W

F2 - Processing parameters  
 SI 65536  
 SF 500.1800155 MHz  
 MDW EM  
 SSB 0  
 LB 0.30 Hz  
 GB 0  
 PC 1.00

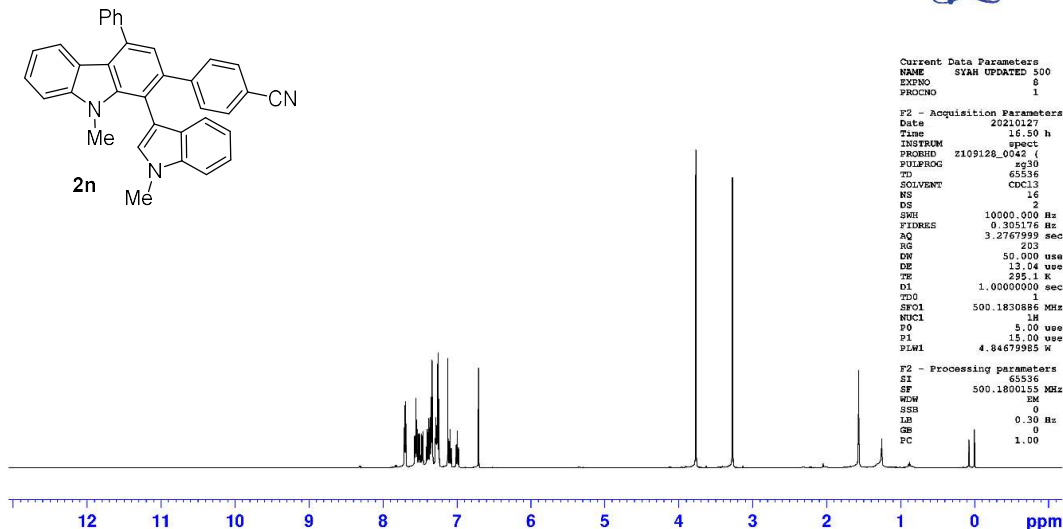

SYAH- CN

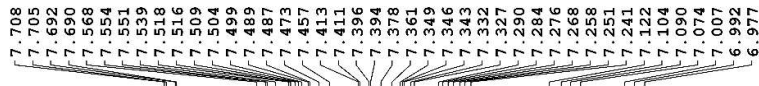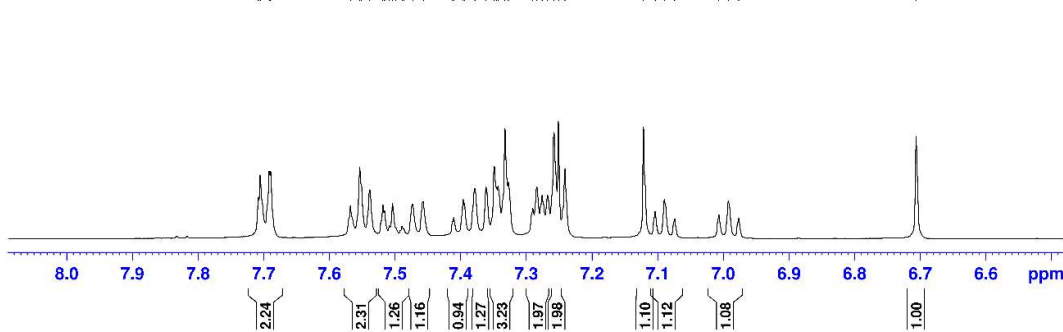

SYAH-CN

148.048  
142.958  
141.027  
140.773  
139.727  
136.896  
136.289  
131.142  
130.865  
130.332  
129.366  
128.621  
127.819  
125.934  
122.753  
122.457  
122.211  
122.029  
121.170  
120.200  
120.171  
119.330  
119.005  
115.064  
111.347  
109.521  
108.890  
77.478  
77.160  
76.842

33.040  
31.452

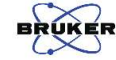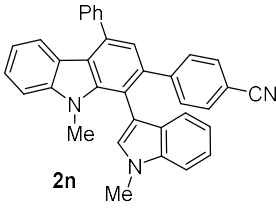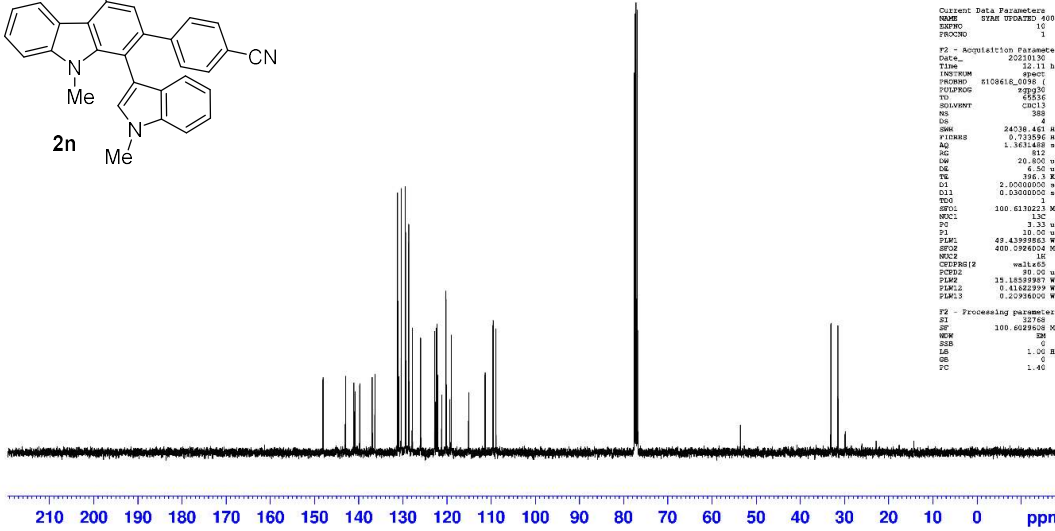

Current Data Parameters  
NAME SYAH-CN-200  
EXPNO 10  
PROCNO 1  
F2 - Acquisition Parameters  
Date\_ 20251130  
Time 22.11 h  
INSTRUM spect  
PROBHD SI0616-009 1  
PULPROG zgpg30  
TD 43516  
SOLVENT CDCl3  
NS 308  
DS 4  
SW 24036.463 Hz  
FIDRES 0.733596 Hz  
AQ 1.3631468 sec  
RG 812  
SQ 20.900 usec  
DE 6.50 usec  
TE 300.2 K  
D1 2.0000000 sec  
d11 0.2000000 sec  
TSD 0  
SFO1 100.6130213 MHz  
MAG1 13C  
PC 1.13 usec  
P1 10.00 usec  
PL1 0.0000000 W  
PL2 49.4339503 W  
SFO2 400.0940004 MHz  
MAG2 1H  
CPCPDE12 waltz16  
SFO3 90.00 usec  
PL3 15.1839987 W  
PL4 0.4182299 W  
PL5 0.2095800 W  
F2 - Processing parameters  
SI 32768  
SF 100.623500 MHz  
WDW DM  
SSB 0  
LB 1.00 Hz  
GB 0  
PC 1.40

SYAH-CN

148.048  
142.958  
141.027  
140.773  
139.727  
136.896  
136.289  
131.142  
130.866  
130.332  
129.366  
128.621  
127.819  
125.934  
122.753  
122.457  
122.211  
122.029  
121.170  
120.200  
120.172  
119.330  
119.005  
115.064  
111.347  
109.521  
108.890

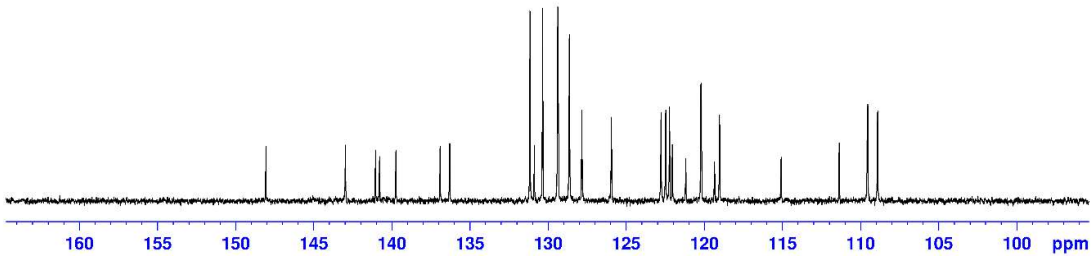

SYTK-Na Ph-P

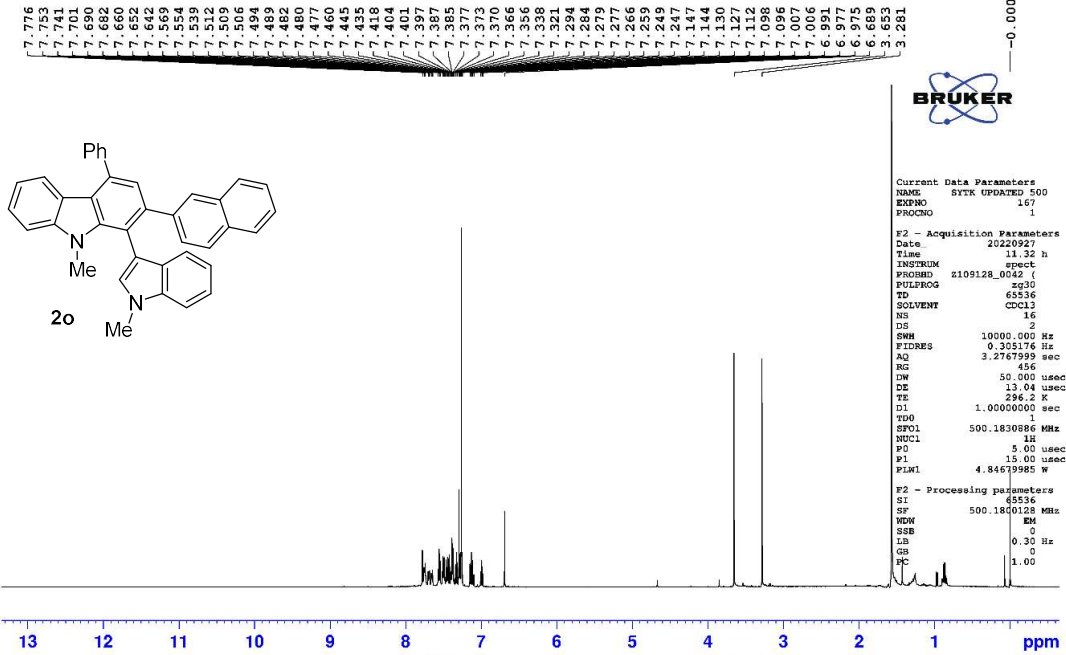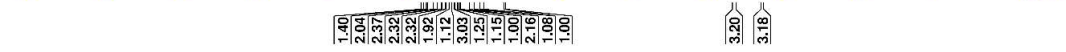

SYTK-Na Ph-P

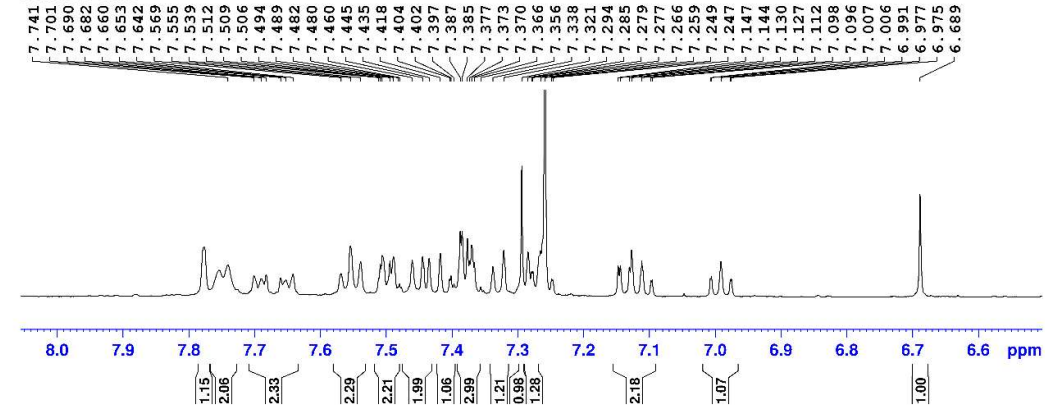

SYTK-Naph-P

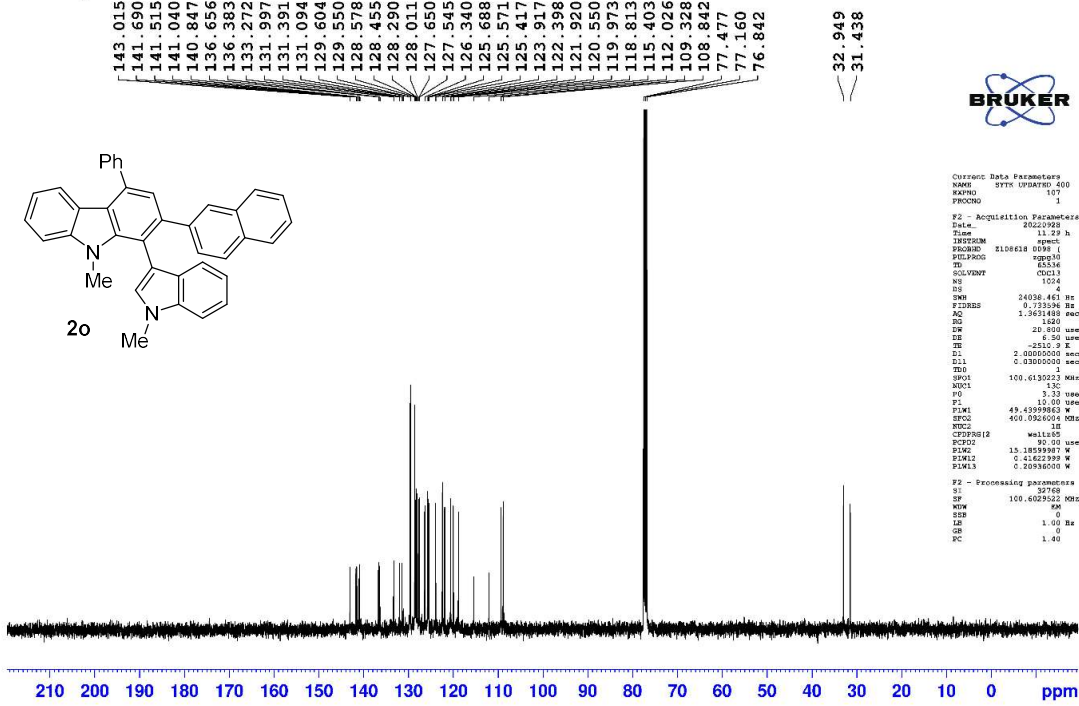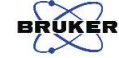

```

Current Data Parameters
NAME: SYTK
EXPNO: 400
PROCNO: 107
F2 - Acquisition Parameters
Date_: 20220926
Time: 11.27 h
INSTRUM: spect
PROCNO: 110843
PULPROG: zgpg30
TD: 65536
SOLVENT: CDCl3
NS: 1024
DS: 4
SWH: 24008.461 Hz
FIDRES: 0.73208 Hz
AQ: 1.3631480 sec
RG: 3840
EQ: 20.800 usec
DE: 6.50 usec
TE: 300.2 K
D1: 2.00000000 sec
d11: 0.03000000 sec
TD0:
SFO1: 100.6130221 MHz
NUC1: 13C
P1: 3.33 usec
PT: 15.00 usec
PL1: 48.43999863 dB
PL2: 400.00000000 dB
PL3: 10
CFOPR12: well180
PCPD2: 90.00 usec
EPR2: 15.18599881 MHz
EPR12: 0.41622999 MHz
EPR13: 0.20836000 MHz
F2 - Processing parameters
SI: 32768
SF: 100.6260021 MHz
WDW: EM
SSB: 0
LB: 1.00 Hz
GB: 0
PC: 1.40
    
```

SYTK-Naph-P

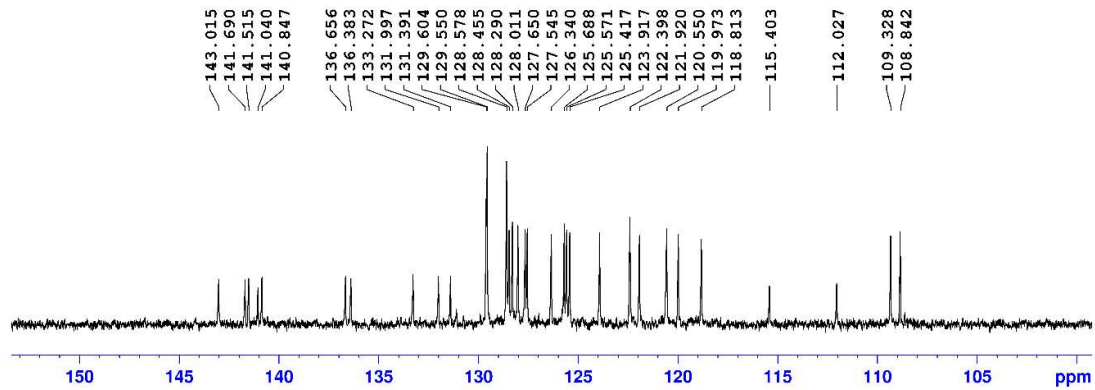

SYTK-9-9

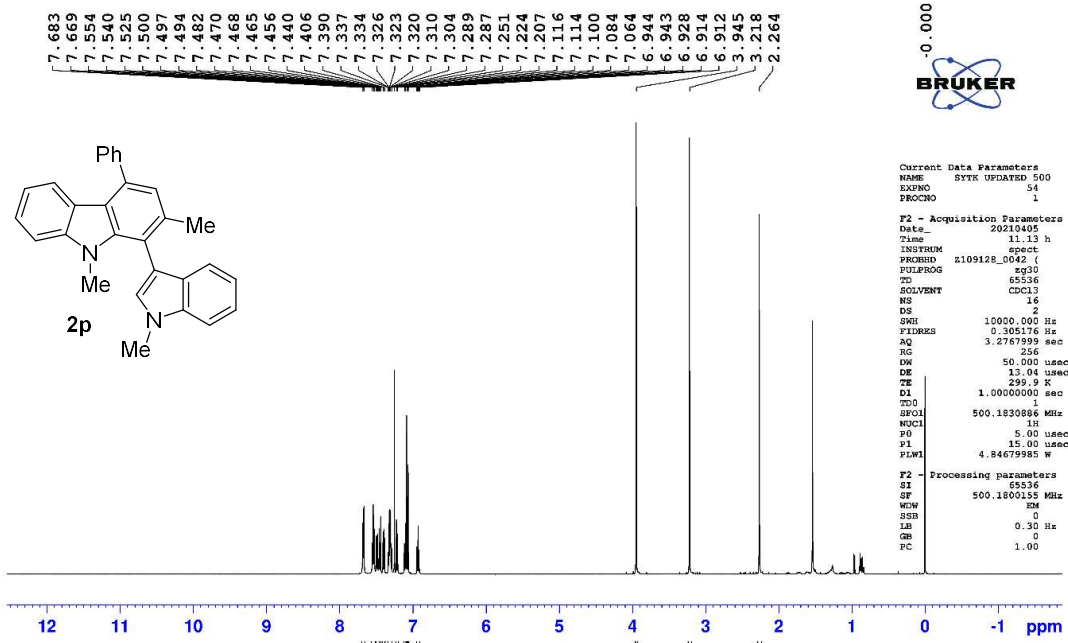

SYTK-9-9

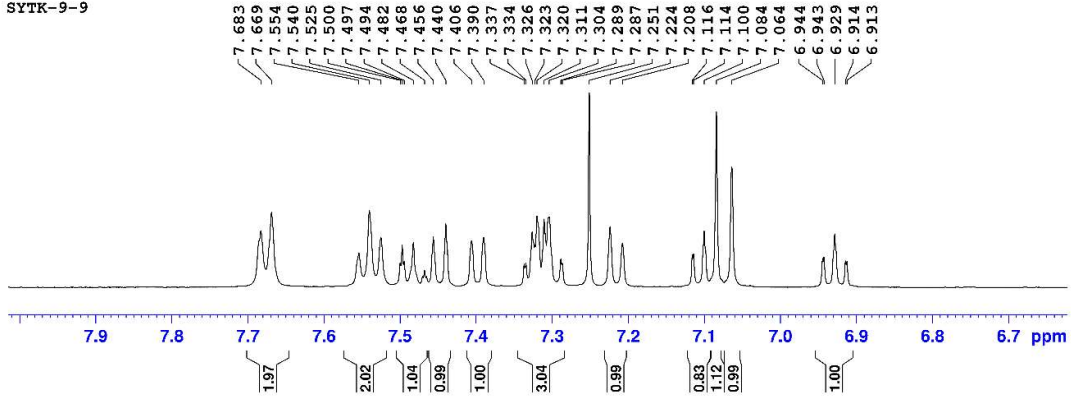

SYTK-9-9

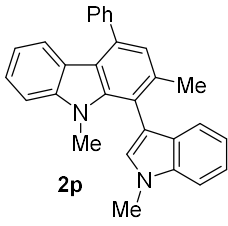

142.378  
141.763  
141.291  
137.075  
136.807  
136.498  
129.743  
129.446  
128.499  
128.424  
127.471  
125.024  
123.188  
122.500  
122.107  
122.000  
120.573  
119.791  
119.200  
118.522  
115.831  
112.514  
109.400  
108.538  
77.478  
77.160  
76.842

33.108  
31.462  
20.806

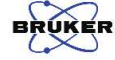

Current Data Parameters  
NAME SYTK UPDATED 200  
SAPNO 13  
PROCNO 1  
F2 - Acquisition Parameters  
Date\_ 20120408  
Time 10.12 h  
INSTRUM spect  
PROBHD E10623 0098 I  
PULPROG zgpg30  
TD 6536  
SOLVENT CDCl3  
NS 531  
DS 4  
SWH 24036.461 Hz  
F2RES 0.15336 Hz  
AQ 1.3651489 sec  
RG 724  
DW 20.800 usec  
DE 6.50 usec  
XE 300.0 K  
D1 2.00000000 sec  
D11 0.03000000 sec  
TD0 1  
SFO1 100.6130231 MHz  
NUC1 13C  
P0 3.33 usec  
P1 15.00 usec  
PL1 49.43998863 W  
PL2 400.00000000 MHz  
RDC2 18  
CPCORP12 waltz160  
PCPD2 90.00 usec  
P1A2 15.18599887 W  
P1M12 0.41622399 W  
P1M15 0.20936000 W  
F2 - Processing parameters  
SI 32768  
SF 100.6025013 MHz  
WDW EM  
SSB 0  
LB 1.00 Hz  
GB 0  
PC 1.40

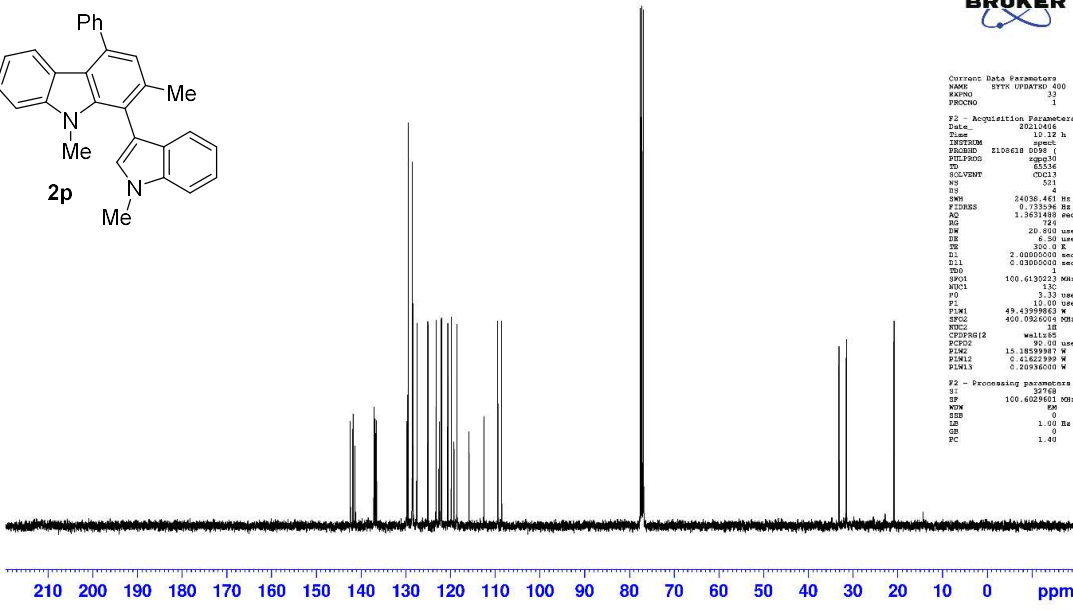

SYTK-9-9

142.378  
141.763  
141.291  
137.075  
136.807  
136.498  
129.743  
129.446  
128.499  
128.424  
127.471  
125.024  
123.188  
122.500  
122.107  
120.573  
119.791  
119.200  
118.522  
115.831  
112.514  
109.400  
108.538

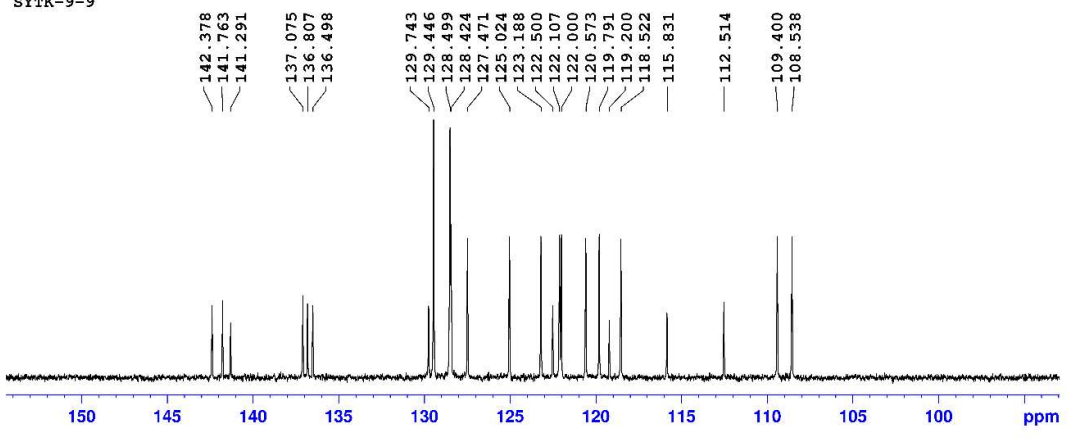

SYTK-02-488 A

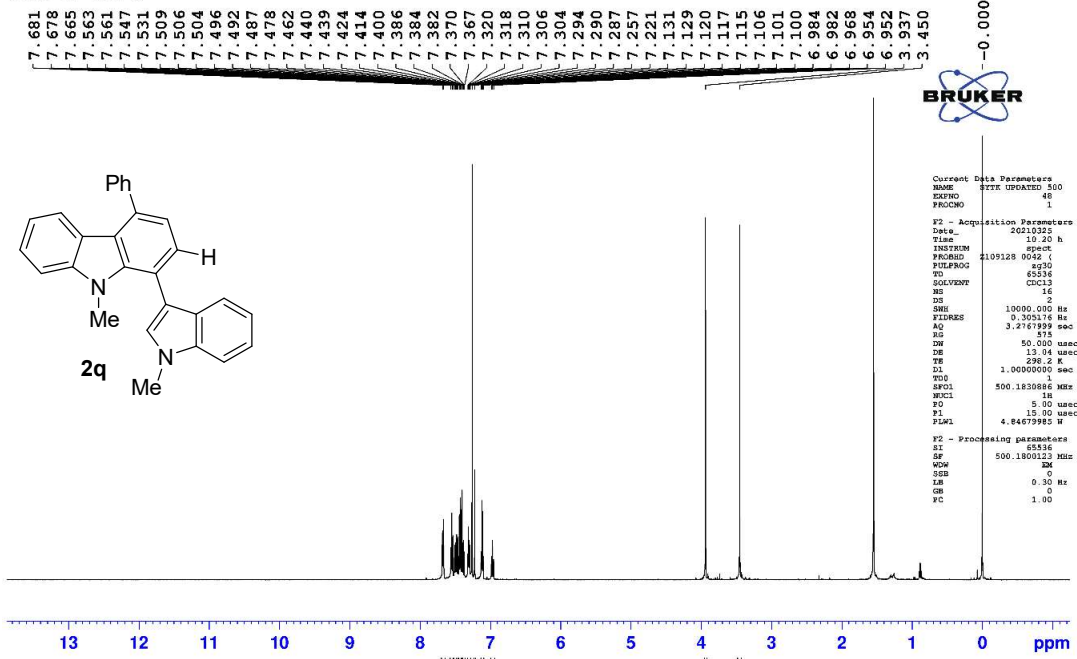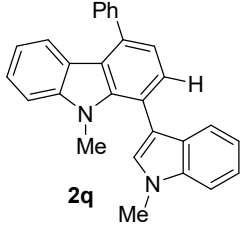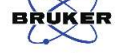

Current Data Parameters  
NAME SYTK\_UPDATED\_500  
EXPNO 48  
PROCNO 1

F2 - Acquisition Parameters  
Date\_ 20110325  
Time 10.20 h  
INSTRUM spect  
PROBHD Z109128 0042 (4  
PULPROG zgpg  
TD 65536  
SOLVENT CDCl3  
NS 16  
DS 10000.000 Hz  
SHE 0.300174 Hz  
AQ 3.2161929 sec  
RG 815  
DE 50.000 usec  
DB 13.04 usec  
TL 236.2 K  
D1 1.00000000 sec  
FID 500.1830886 MHz  
SFO 500.131122  
MTC 18  
PC 5.00 usec  
PI 15.00 usec  
PL2 4.84673982 Hz

F2 - Processing parameters  
SI 65536  
SF 500.1801122 MHz  
WDW 0  
SFB 0.30 Hz  
GB 0  
PC 1.00

SYTK-02-488 A

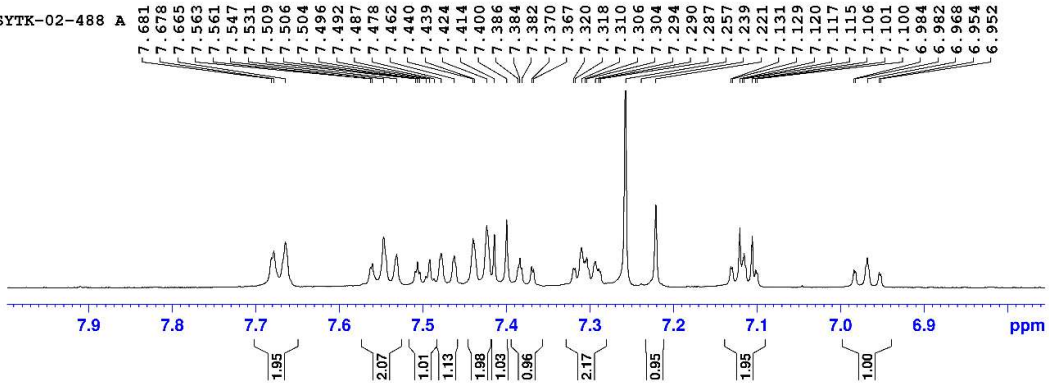

SYTK-02-488 A

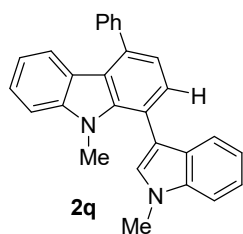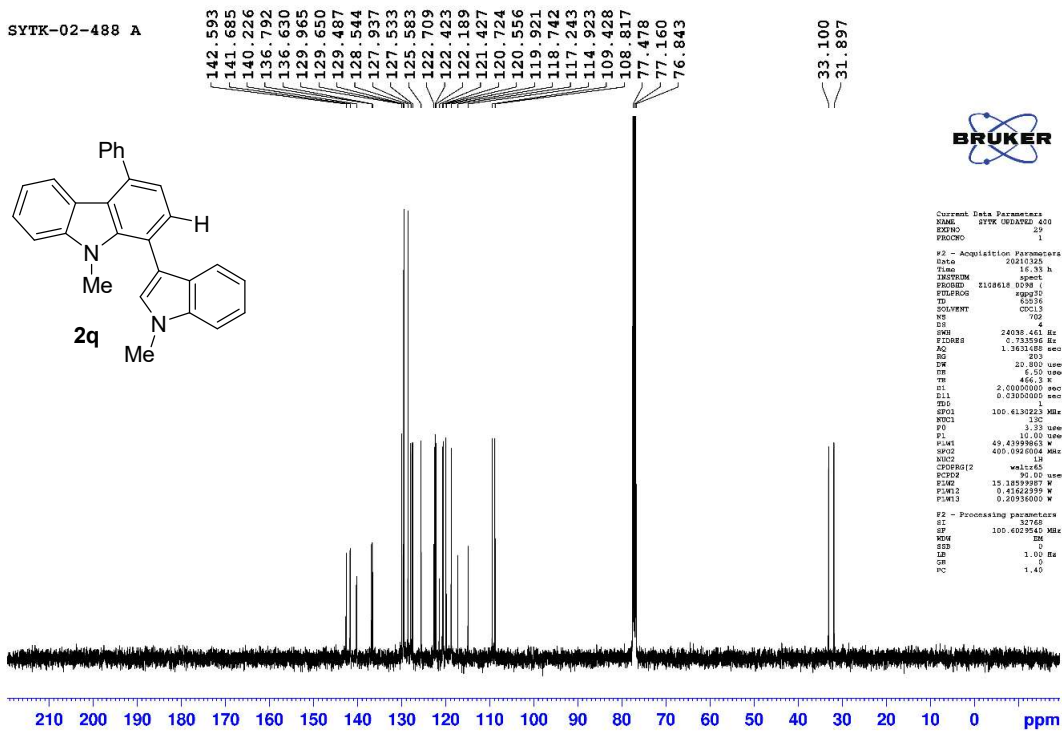

SYTK-02-488 A

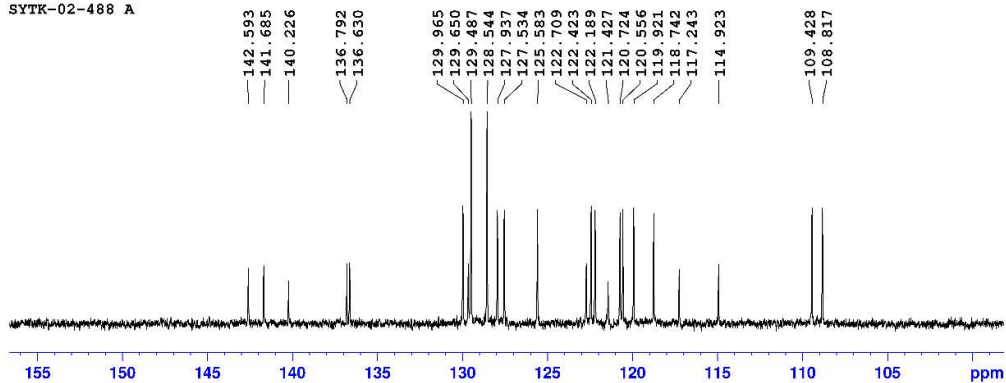



SYSC-P-24

7.550  
7.534  
7.500  
7.498  
7.484  
7.430  
7.415  
7.400  
7.369  
7.355  
7.340  
7.338  
7.326  
7.323  
7.321  
7.313  
7.309  
7.299  
7.289  
7.286  
7.283  
7.280  
7.277  
7.274  
7.271  
7.266  
7.259  
7.254  
7.248  
7.241  
7.224  
7.222  
7.163  
7.149  
7.133  
7.111  
7.055  
7.041  
7.025  
6.846  
3.109

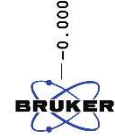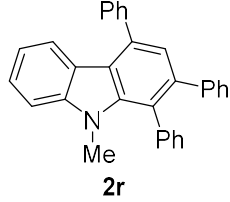

Current Data Parameters  
 NAME SYSC\_UPDATED\_500  
 EXPNO 28  
 PROCNO 1

F2 - Acquisition Parameters  
 Date\_ 20211113  
 Time 10.44 h  
 INSTRUM spect  
 PROCNO 2109128\_0042 (1  
 PULPROG zg30  
 TD 65536  
 SOLVENT CDCl3  
 NS 16  
 DS 2  
 SWH 10000.000 Hz  
 FIDRES 0.305176 Hz  
 AQ 3.2767999 sec  
 RG 406  
 DW 50.000 usec  
 DE 13.04 usec  
 TE 293.6 K  
 D1 1.00000000 sec  
 TDO 1  
 SFO1 500.1303086 MHz  
 NUC1 1H  
 P1 5.00 usec  
 F1 15.00 usec  
 PL1 4.84679985 W

F2 - Processing parameters  
 SZ 65536  
 SF 500.1303086 MHz  
 WDW EM  
 SSB 0  
 LB 0.30 Hz  
 GB 0  
 PC 1.00

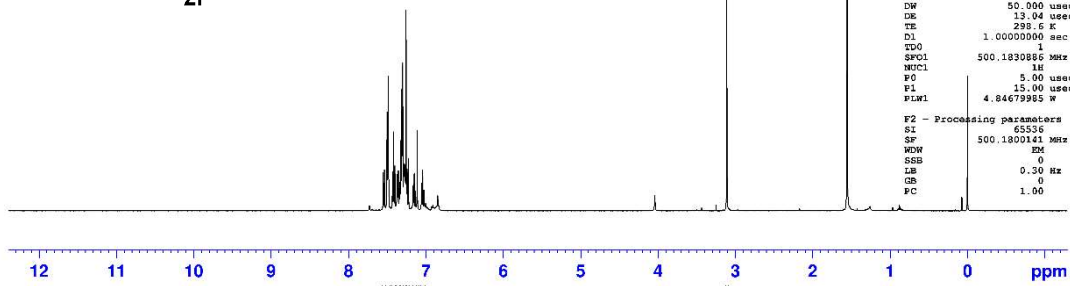

1.12  
4.94  
2.16  
1.63  
5.24  
2.28  
1.32  
1.26  
1.06  
1.30

3.00

SYSC-P-24

7.550  
7.534  
7.500  
7.498  
7.484  
7.430  
7.415  
7.400  
7.369  
7.355  
7.340  
7.338  
7.326  
7.324  
7.321  
7.313  
7.309  
7.299  
7.289  
7.286  
7.283  
7.280  
7.277  
7.274  
7.271  
7.266  
7.259  
7.255  
7.248  
7.241  
7.224  
7.164  
7.149  
7.133  
7.111  
7.055  
7.041  
7.025  
6.847

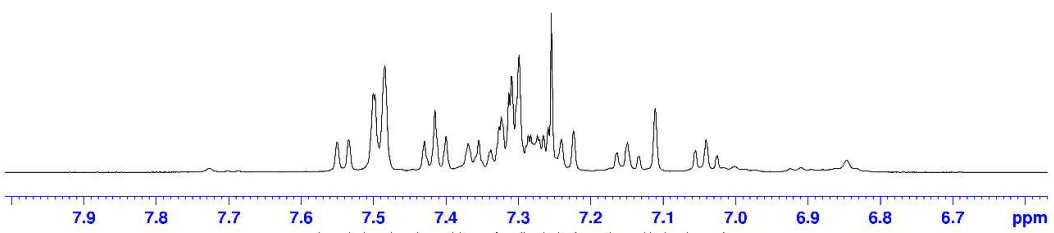

1.00  
1.00  
4.33  
2.25  
1.99  
5.31  
2.19  
1.16  
1.31  
1.03  
1.31

SYSC-P-24

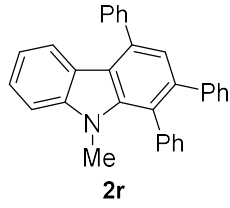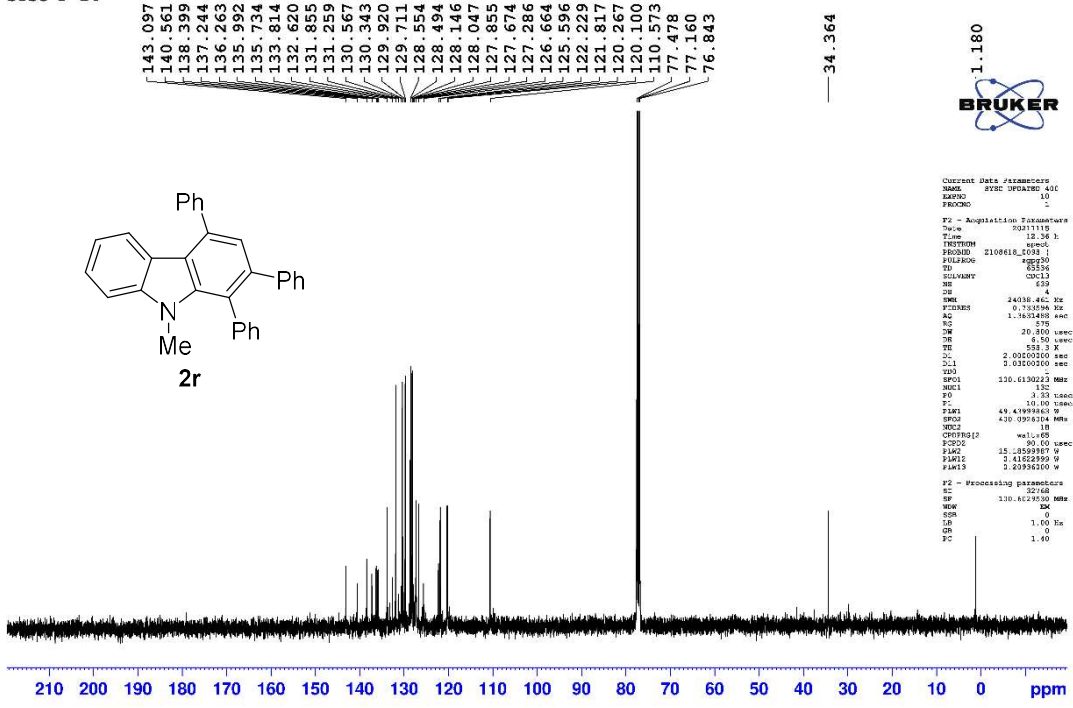

SYSC-P-24

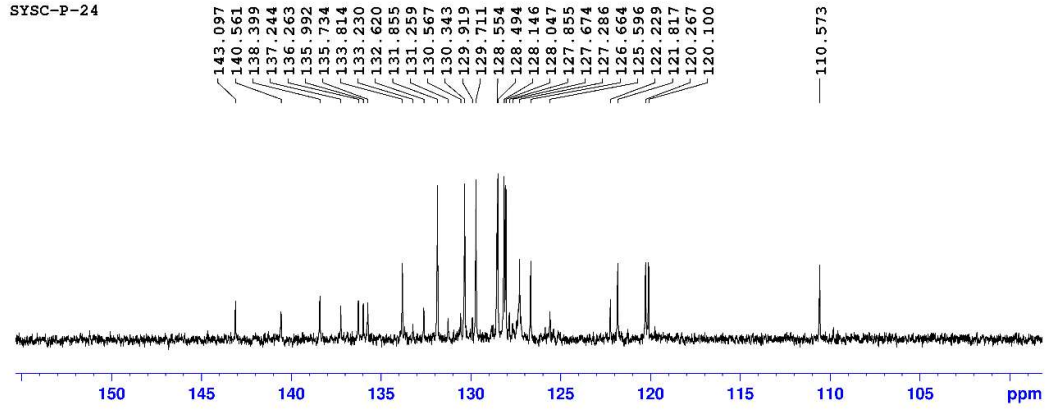

SYSC-P-28-B

7.745  
7.732  
7.730  
7.569  
7.555  
7.552  
7.540  
7.514  
7.499  
7.480  
7.311  
7.309  
7.295  
7.281  
7.278  
7.253  
7.178  
7.168  
7.151  
7.126  
7.114  
7.111  
7.099  
7.092  
7.081  
7.076  
7.072  
7.063  
7.045  
7.031  
7.028  
7.003  
7.002  
6.993  
6.989  
6.987  
6.978  
6.963  
6.613  
6.602  
6.598  
5.016

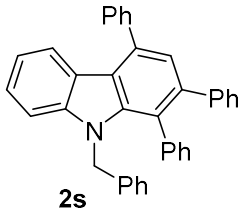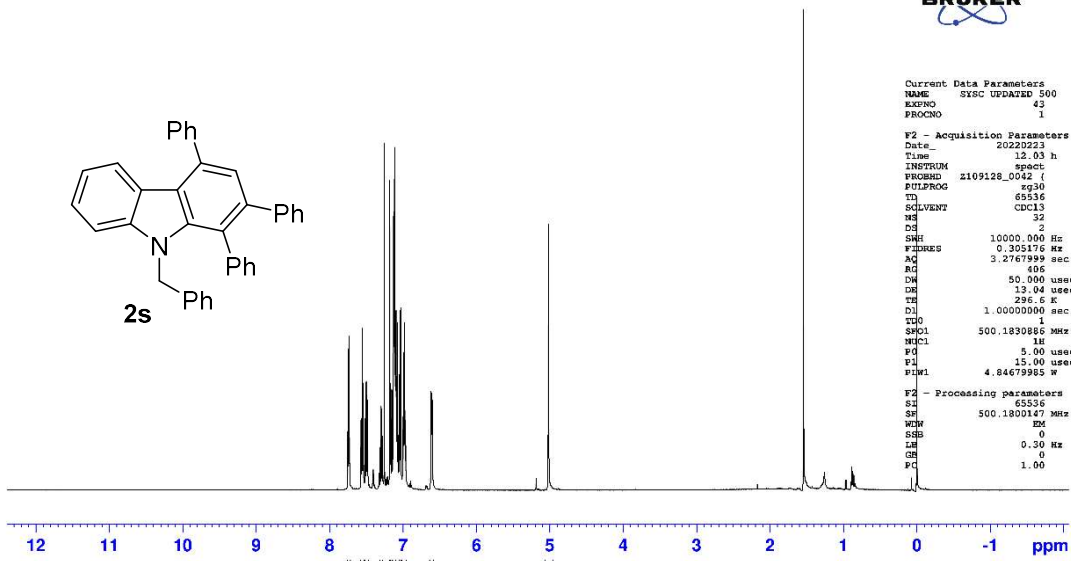

Current Data Parameters  
NAME SYSC UPDATED 500  
KEXPNO 43  
PROCNO 1

F2 - Acquisition Parameters  
Date\_ 20220223  
Time 12.03 h  
INSTRUM spect  
PROBHD z109128\_0042 f  
PULPROG zgpg30  
TD 65536  
FIDRES 0.32  
SOLVENT CDCl3  
NS 32  
DS 2  
SWH 10000.000 Hz  
FIDRES 0.305176 Hz  
AQ 3.2767999 sec  
RG 406  
DM 50.000 usec  
DE 13.04 usec  
TE 296.6 K  
D1 1.00000000 sec  
TDO 1  
SFO1 500.130886 MHz  
NUC1 1H  
PD 5.00 usec  
PL 15.00 usec  
PWL 4.84679985 W

F2 - Processing parameters  
SI 65536  
SF 500.1300147 MHz  
WDW EM  
SSB 0  
LB 0.30 Hz  
GB 0  
PC 1.00

SYSC-P-28-B

7.748  
7.745  
7.742  
7.732  
7.571  
7.566  
7.555  
7.552  
7.540  
7.516  
7.514  
7.511  
7.504  
7.499  
7.484  
7.480  
7.311  
7.309  
7.295  
7.281  
7.278  
7.253  
7.178  
7.168  
7.151  
7.137  
7.131  
7.126  
7.124  
7.118  
7.114  
7.111  
7.104  
7.099  
7.097  
7.092  
7.088  
7.081  
7.076  
7.072  
7.064  
7.045  
7.031  
7.029  
7.003  
7.002  
6.993  
6.989  
6.987  
6.978  
6.973  
6.963  
6.613  
6.602  
6.598

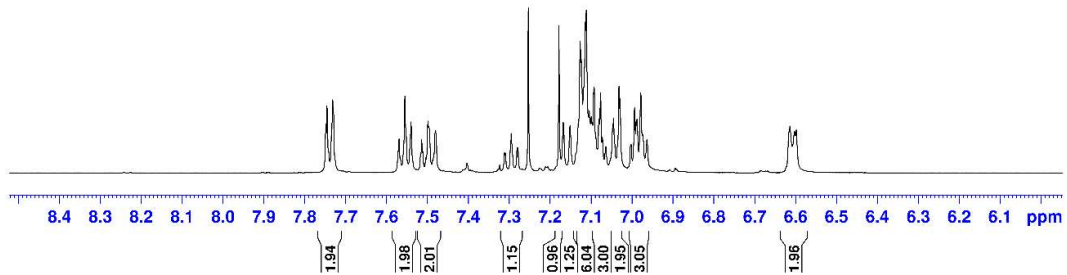

SYSC-P-28-overnight

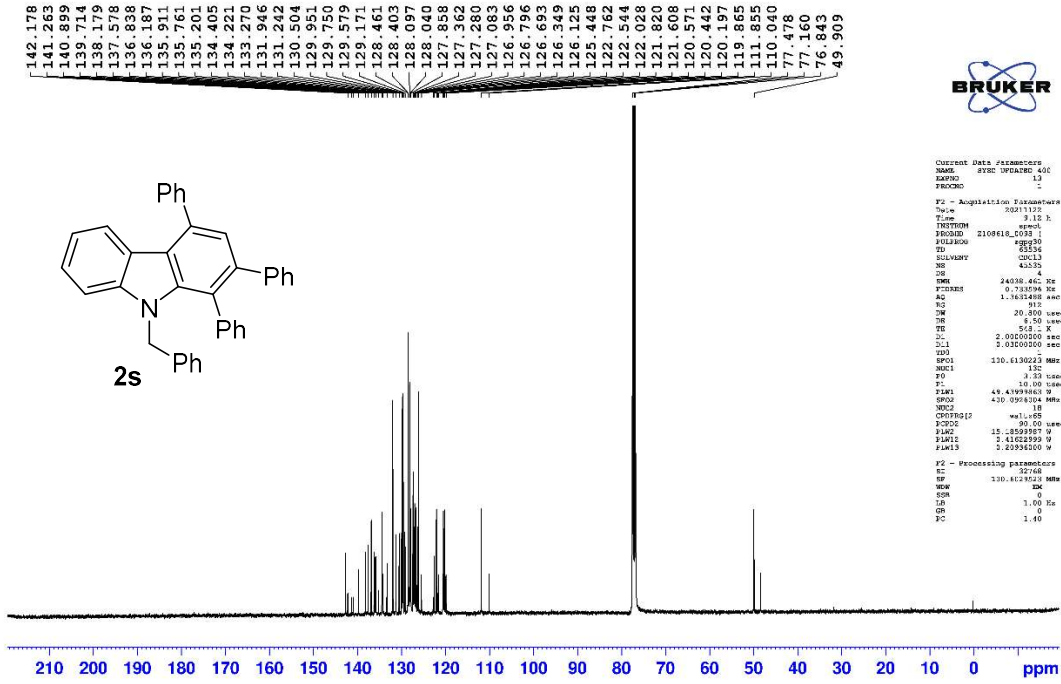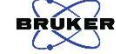

Current Data Parameters  
NAME: SYSC-P-28-overnight  
EXPNO: 13  
PROCNO: 1

F2 - Acquisition Parameters  
Date\_ 20211122  
Time: 8:12:2  
INSTRUM: spect  
PROBHD: 210918\_5031 1  
PULPROG: zgpg30  
TD: 65536  
SOLVENT: CDCl3  
NS: 4032  
DS: 4  
SWH: 24038.462 Hz  
FIDRES: 0.731894 Hz  
AQ: 1.1612481 sec  
RG: 911  
SW: 20.850 usec  
DR: 6.50 usec  
DE: 5.0 Hz  
TE: 2.00000000 sec  
D1: 2.00000000 sec  
D11: 2.00000000 sec  
D12: 2.00000000 sec  
D13: 2.00000000 sec  
SFO: 100.6130223 MHz  
NUC1: 13C  
P1: 1.53 usec  
PL1: 0.00 usec  
PL2: 49.4199846 Hz  
PL3: 430.0998304 Hz  
PL4: 0.00 usec  
PL5: 15.2809989 Hz  
PL6: 1.6160399 Hz  
PL7: 5.2099800 Hz

F2 - Processing parameters  
SI: 32768  
SF: 100.6130223 MHz  
WDW: EM  
SSB: 0  
GB: 0  
PC: 1.40

SYSC-P-28

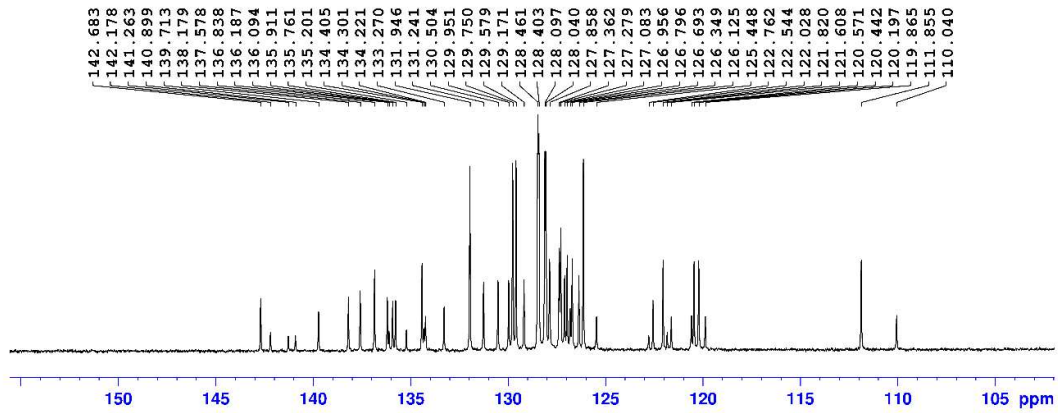

SYSC-P-54

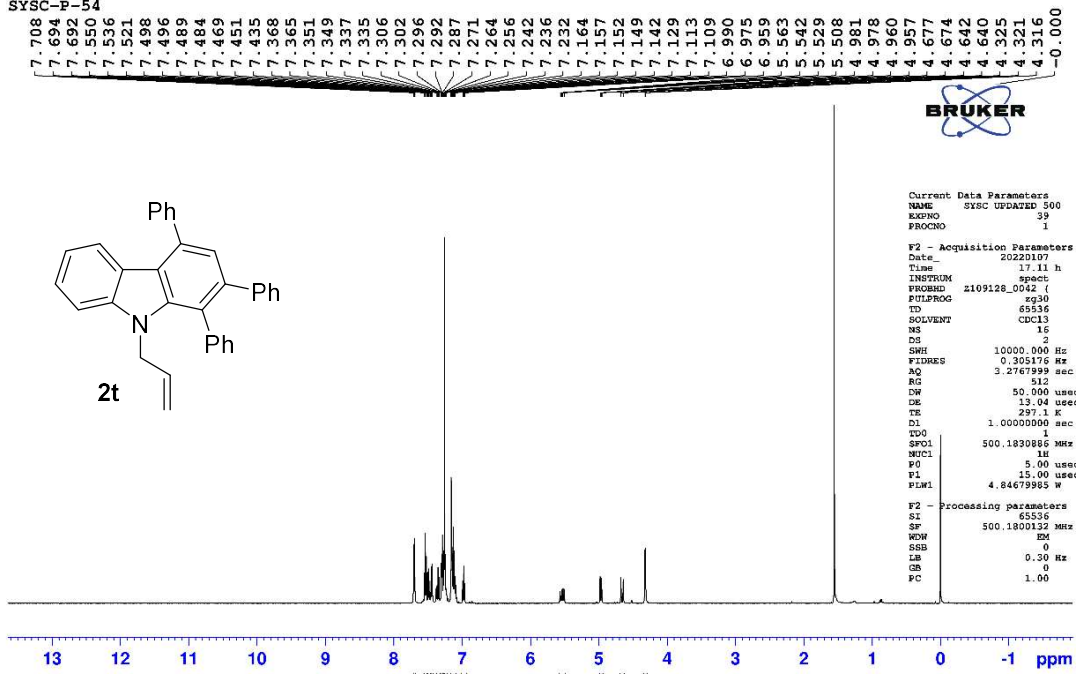

SYSC-P-54

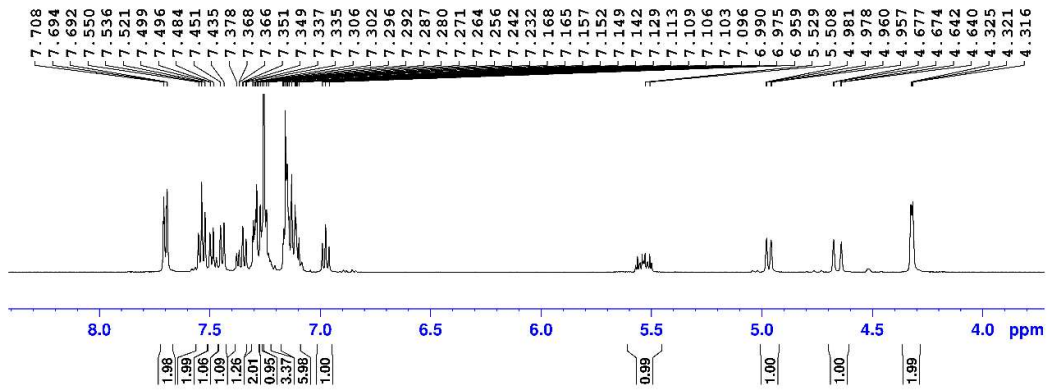

SYSC-P-54

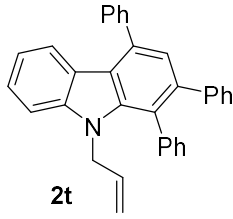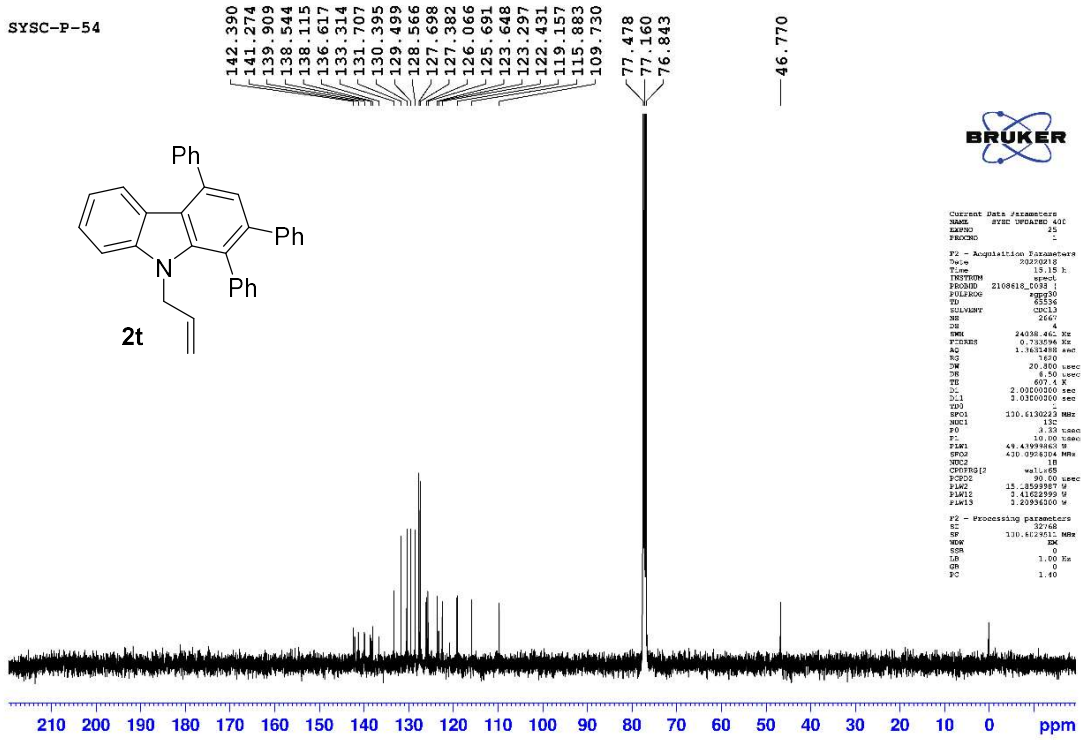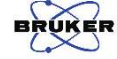

```

Current Data Parameters
NAME      SYSC-DWATED 401
EXPNO    2
PROCNO   1
F2 - Acquisition Parameters
Time     0320218
Date_    15.10.18
INSTRUM  spect
PROBHD   zgpg30
PULPROG  zgpg30
TD       65536
SOLVENT  CDCl3
NS       2647
DS       4
SWH       24038.441 Hz
FIDRES   0.731594 Hz
AQ       1.3631481 sec
RG       1470
SR       29.800 usec
CH       8.50 usec
TE       300.2 K
C11      2.0000000 sec
C12      3.0000000 sec
TD0
SFO1     100.626125 MHz
NUC1      13C
P1        3.00 usec
PC1       10.00 dB
FWD1     48.4099840 dB
EP1      430.0958304 MHz
NUC2      1H
C12PRG2  waltz16
PCPD2    15.00 usec
P12      3.1602990 usec
FWD12   3.1602990 dB
P1212   3.0994000 dB
F2 - Processing parameters
SI        32768
SF        100.626125 MHz
WDW       EM
SSB       0
GB        0
PC        1.00 dB
PC2       1.40

```

SYSC-P-54

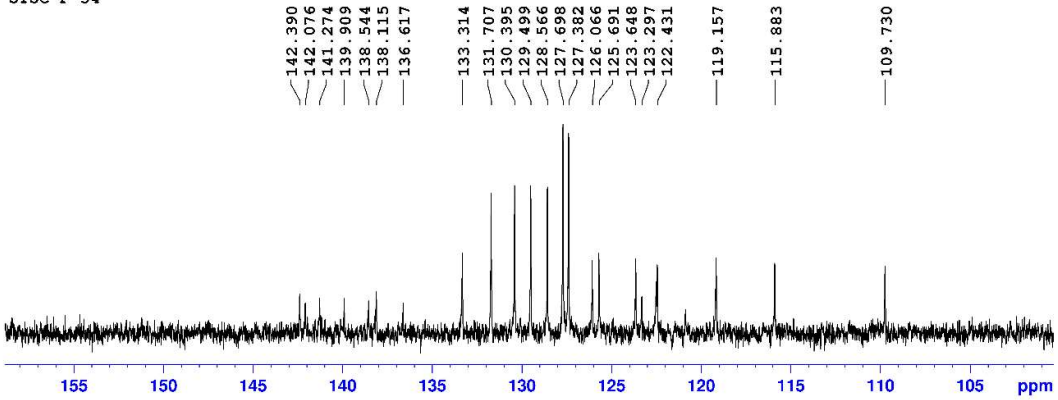

SYSC-P-38

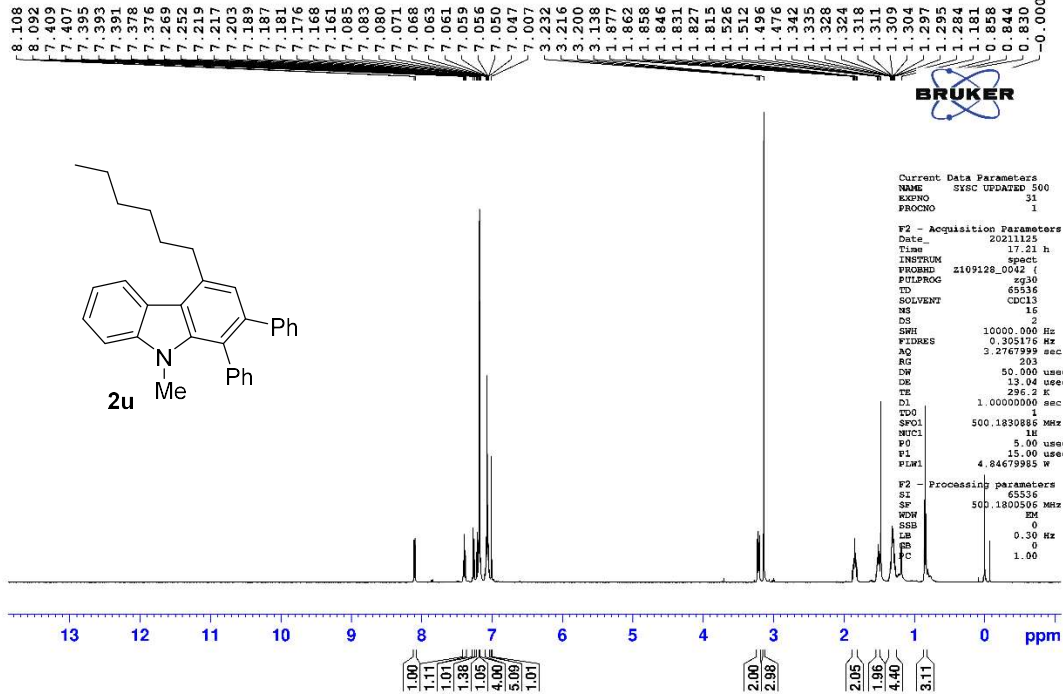

SYSC-P-38

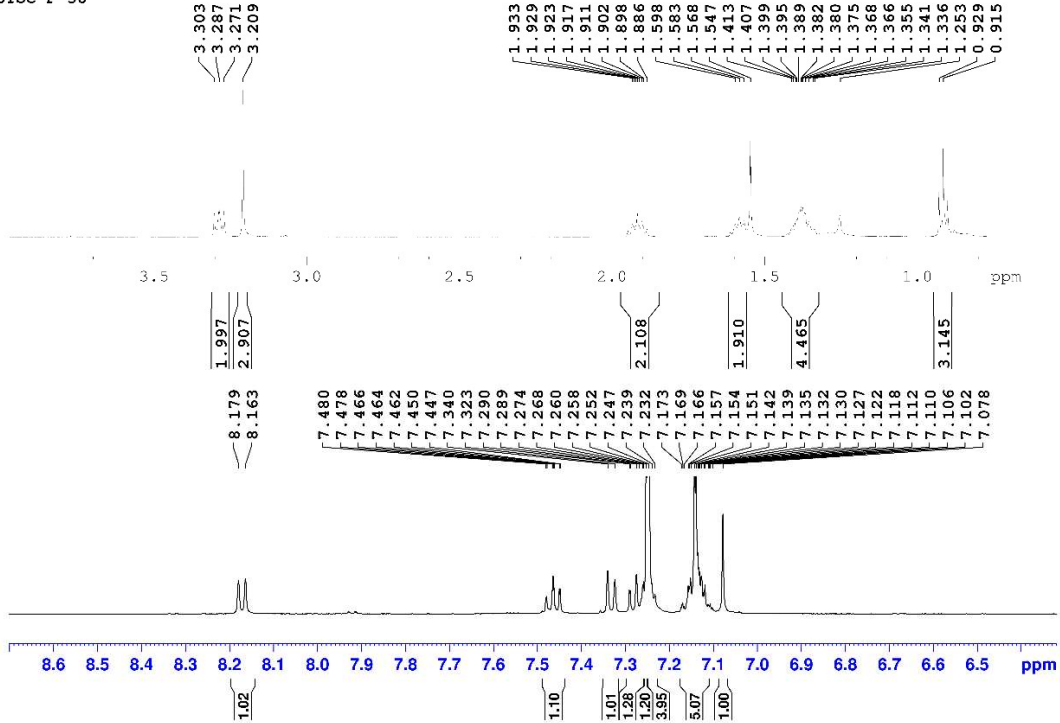

SYSC-P-38

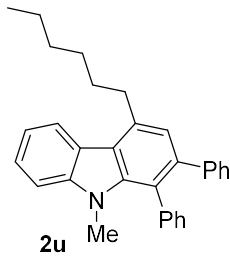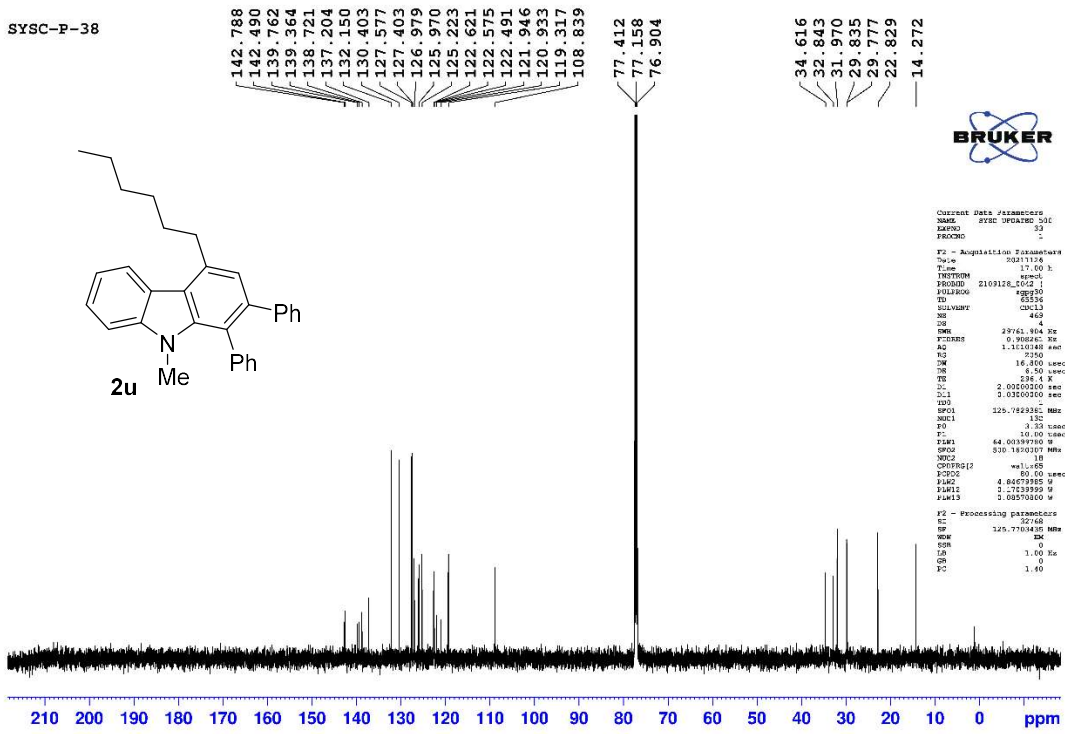

SYSC-P-38

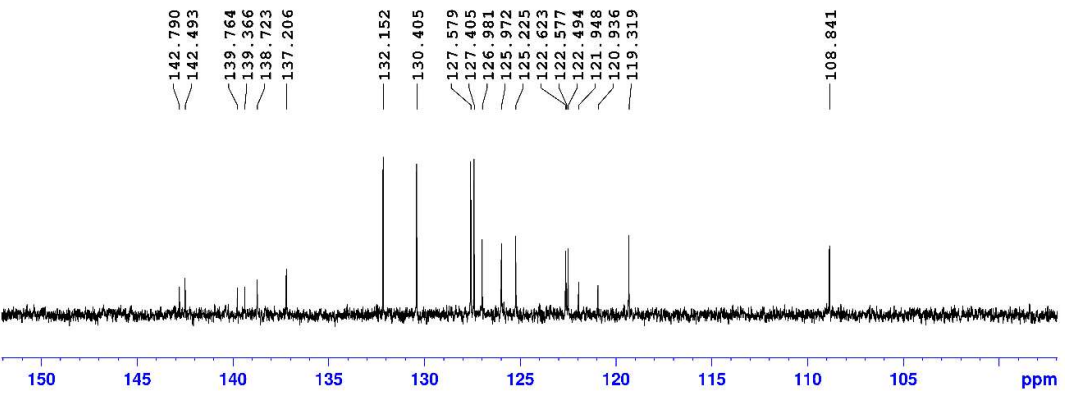



SYSC-P-41

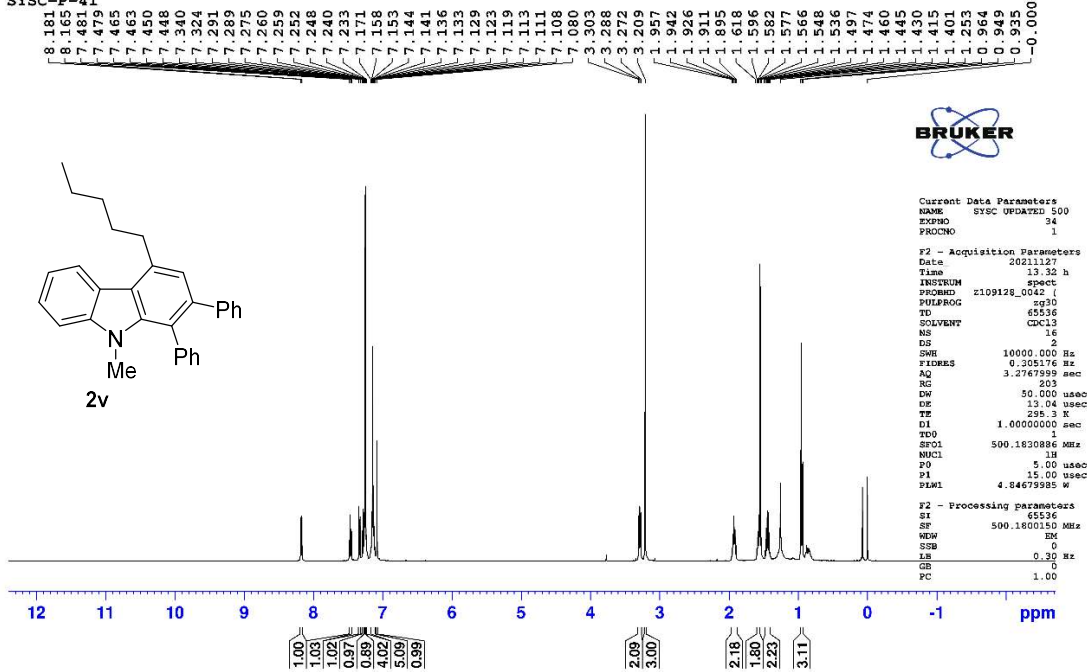

SYSC-P-41

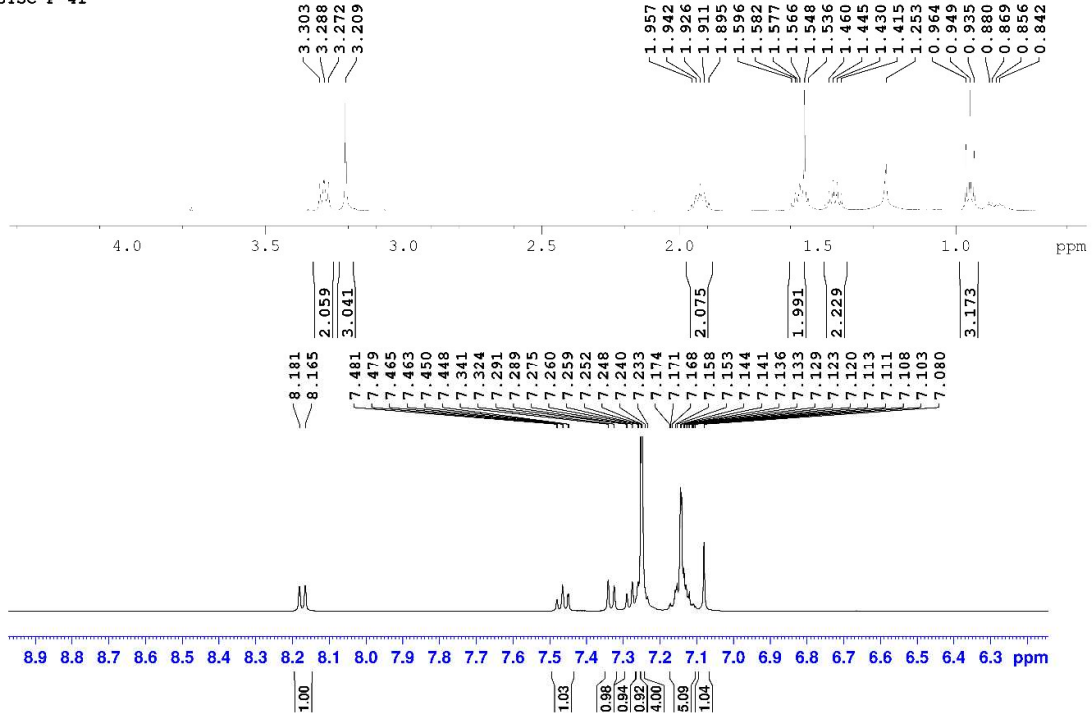

SYSC-41

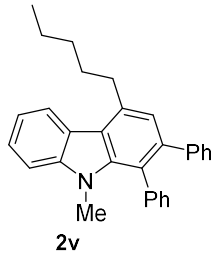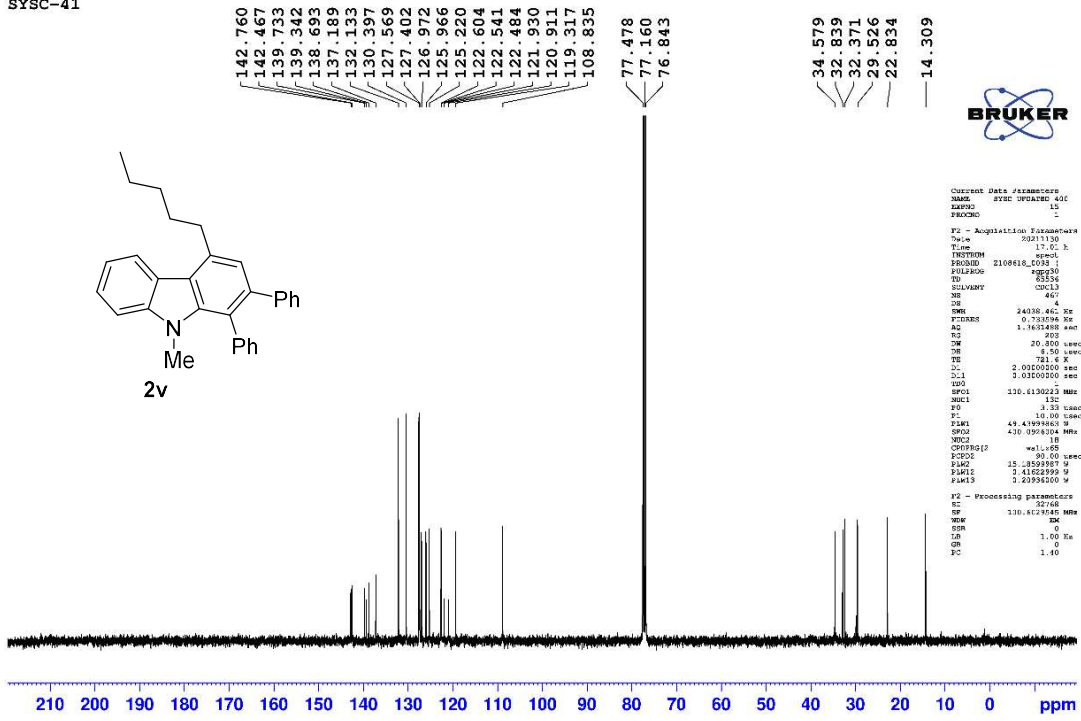

SYSC-41

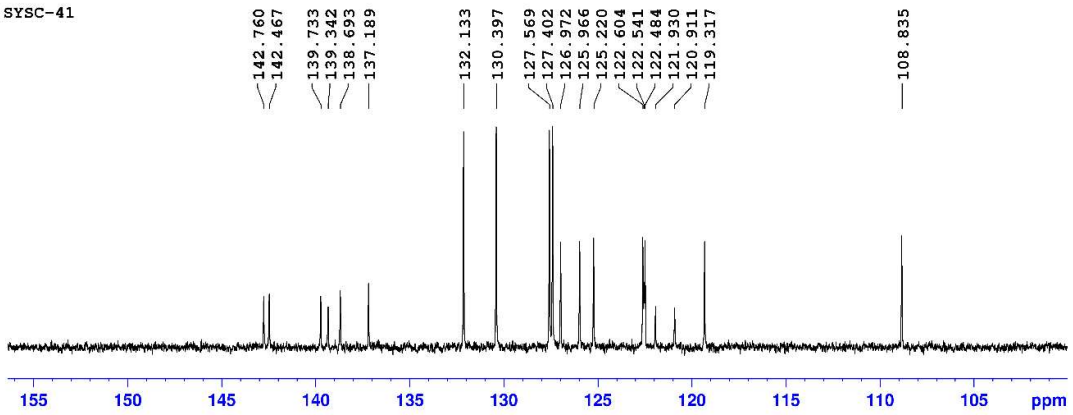

SYSC-P-47

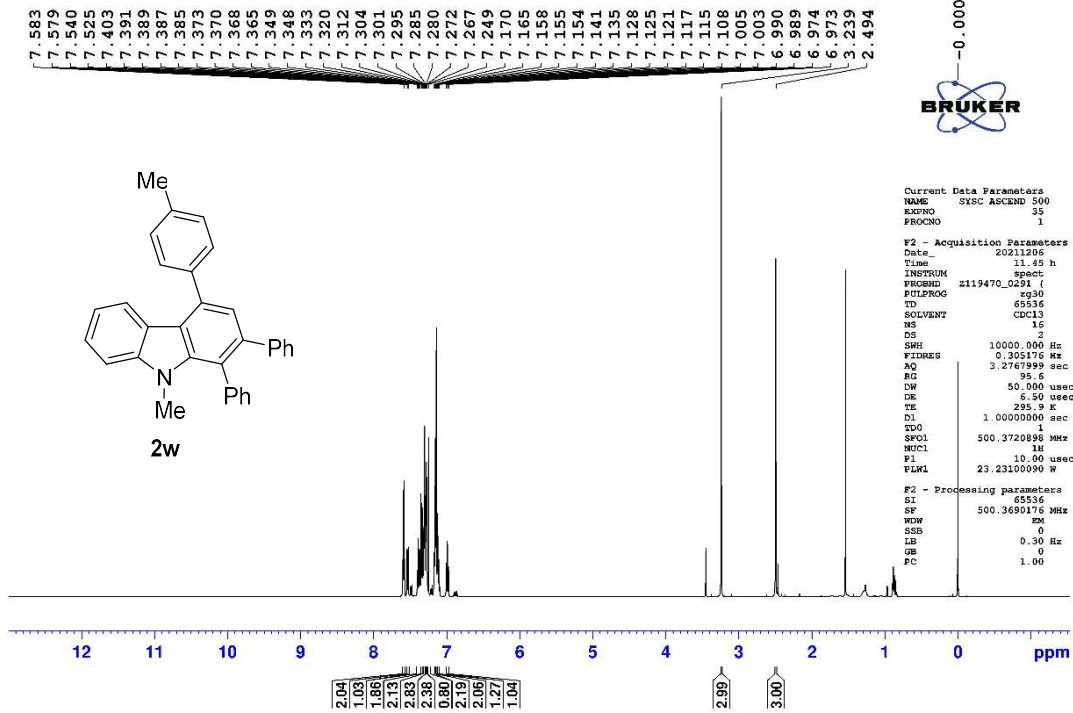

SYSC-P-47

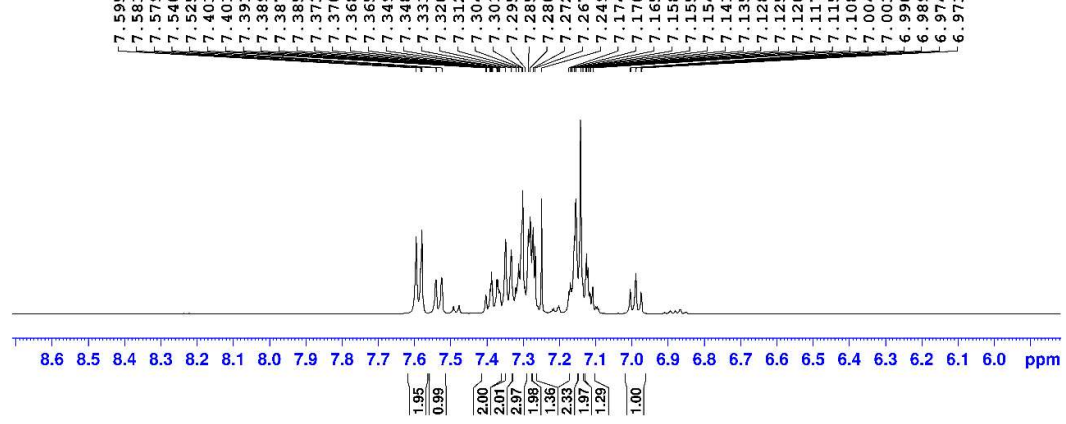

SYSC-P-47

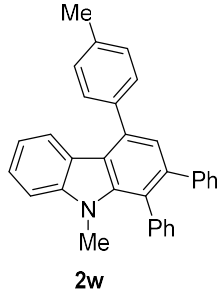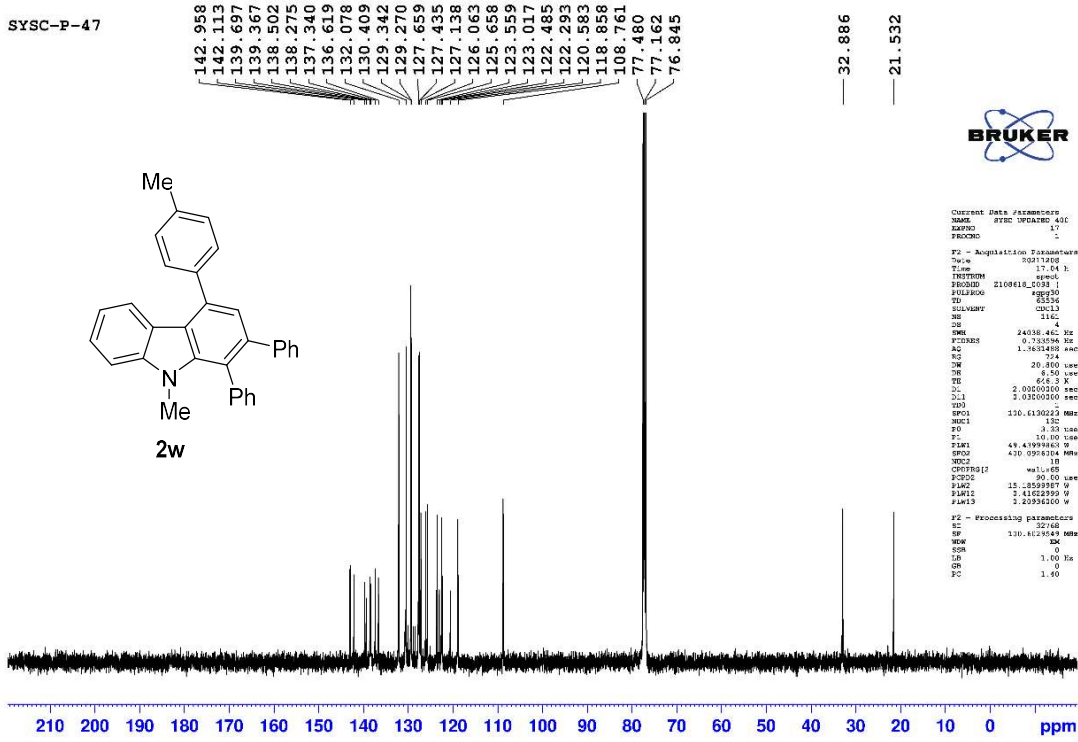

**BRUKER**

```

Current Data Parameters
NAME      SYSC-UPSCALE-47C
EXPNO    17
PROCNO   1
F2 - Acquisition Parameters
Date_    20111208
Time     17:04.1
INSTRUM  spect
PROBHD   510061L050 1
PULPROG  zgpg30
NUC1      13C
SOLVENT  CDCl3
NS        3162
DS        4
SWH       24336.462 Hz
FIDRES    0.73358 Hz
AQ        1.1623058 sec
RG        724
WDW        20.500 usec
DE        6.50 usec
TE        300.2 K
DCL       2.0000010 sec
DLE       0.0300010 sec
VDW       110.6130215 MHz
MDEL      152
SI         3.123 usec
PI         10.000 usec
RG1       48.41898662 W
SFO2      410.0963104 MHz
WDW2      18
SFO22     null:65
SFO23     90.00 usec
PLA2      15.18599987 W
PLA12     0.41022999 W
PLW13     0.22936100 W
F2 - Processing parameters
SI         32768
SF         110.613049 MHz
WDW        EM
SSB        0
GB         0.00 usec
PC         1.60
  
```

SYSC-P-47

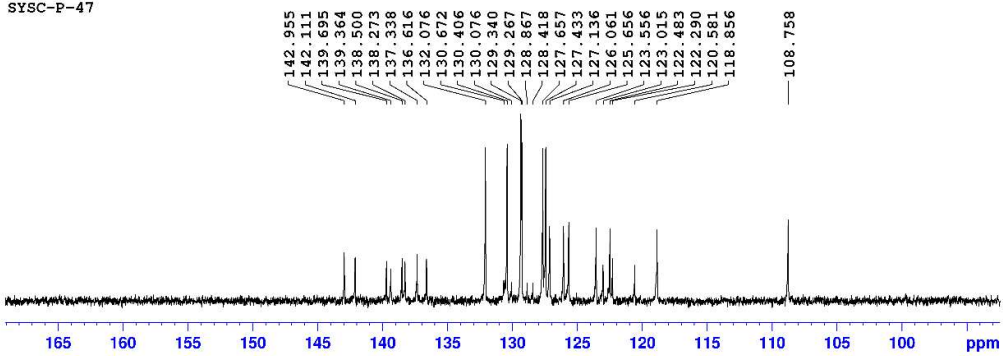

SYSC-P-65

7.765  
7.748  
7.733  
7.717  
7.661  
7.545  
7.530  
7.261  
7.244  
7.230  
7.224  
7.218  
7.210  
7.184  
7.091  
7.089  
7.086  
7.080  
7.070  
7.063  
7.052  
6.957  
6.955  
6.941  
6.927  
6.925

3.184

-0.000

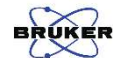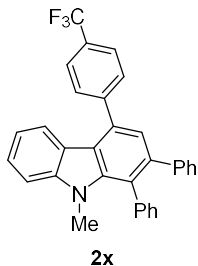

Current Data Parameters  
NAME SYSC\_UPDATED\_500  
EXPNO 38  
PROCNO 1  
F2 - Acquisition Parameters  
Date\_ 20220107  
Time 11:50 h  
INSTRUM spect  
PROBHD zg30  
PULPROG zg30  
TD 65536  
SOLVENT CDCl3  
MS 15  
DS 2  
SWH 10000.000 Hz  
FIDRES 0.305176 Hz  
AQ 3.2187989 sec  
RG 405  
DQ 50.000 usec  
TE 12.04 usec  
TE 297.7 K  
C1 1  
C2 1.00000000 sec  
C3 1  
SFO1 500.1830886 MHz  
NUC1 1H  
H0 5.00 usec  
H1 15.00 usec  
H1a1 4.84679985 w  
F2 - Processing parameters  
SI 65536  
SF 500.1800492 MHz  
WDW EM  
SSB 0  
GB 0.30 Hz  
CB 0  
MC 1.00

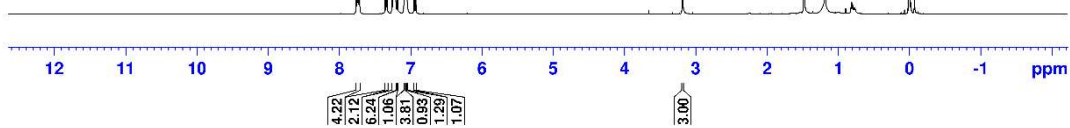

SYSC-P-65

7.837  
7.820  
7.805  
7.788  
7.434  
7.432  
7.417  
7.401  
7.332  
7.322  
7.316  
7.308  
7.302  
7.295  
7.289  
7.281  
7.256  
7.162  
7.161  
7.157  
7.152  
7.142  
7.138  
7.135  
7.129  
7.124  
7.028  
7.027  
7.012  
6.998  
6.996

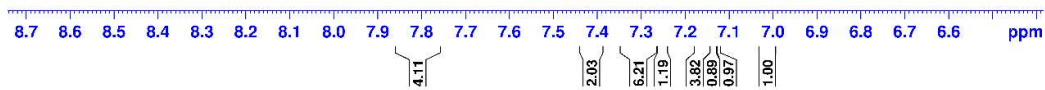

SYSC-P-65

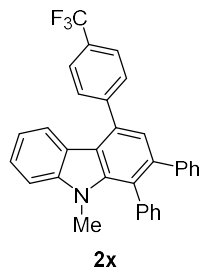

145.047  
143.023  
141.795  
139.869  
139.407  
138.198  
134.913  
131.978  
130.346  
129.905  
127.751  
127.535  
127.332  
126.266  
126.028  
125.583  
123.942  
123.379  
122.108  
121.793  
120.250  
119.156  
109.051  
77.160  
76.843

32.896

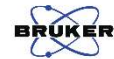

```

Current Data Parameters
NAME: SYSC-UPDATE-65
EXPNO: 2
PROCNO: 1
F2 - Acquisition Parameters
Date_ 20220106
Time 15:02:26
INSTRUM spect
PROBHD 210861L_C03B 1
PULPROG zgpg30
TD 65536
SOLVENT CDCl3
NS 2324
DS 4
SFR 24930.460 Hz
FIDRES 0.1261884 Hz
AQ 1.1615481 sec
RG 402
SM 20.000 usec
DE 8.50 usec
TE 300.2 K
ZC 2.0160250 sec
ZL 1.0320050 sec
FID 130.6130213 MHz
NUC1 13C
NUC2 13C
PC 10.00 usec
F1A1 49.47988603 MHz
SFO2 430.0908104 MHz
NPROB 18
CPDPRG12 waltz16
PROC 00:00:46.66
F1A2 15.3509987 MHz
F1A12 1.41622959 MHz
F1A13 1.20336100 MHz
F2 - Processing parameters
SI 32768
SF 130.6130213 MHz
WDW EM
SSB 0
GB 1.00 Hz
CN 0
PC 1.40

```

SYSC-P-65

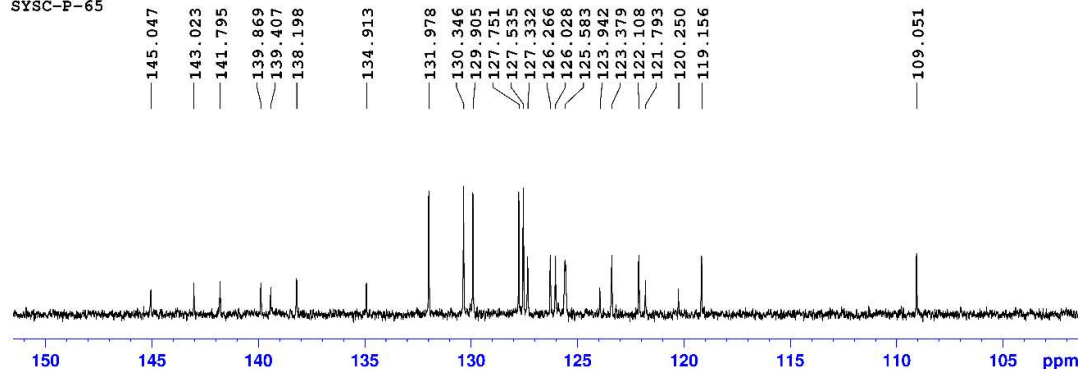

P-44

7.743  
7.616  
7.601  
7.517  
7.502  
7.486  
7.419  
7.417  
7.406  
7.403  
7.391  
7.389  
7.387  
7.379  
7.376  
7.336  
7.333  
7.331  
7.328  
7.321  
7.317  
7.293  
7.291  
7.285  
7.279  
7.252  
7.200  
7.178  
7.175  
7.172  
7.168  
7.165  
7.152  
7.148  
7.141  
7.136  
7.132  
7.129  
7.126  
7.119  
7.117  
7.1017  
7.016  
7.003  
7.001  
6.987  
6.985  
3.258

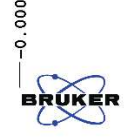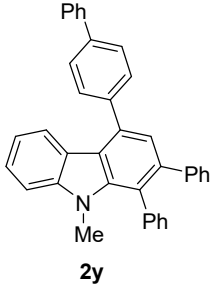

Current Data Parameters  
 NAME SYSC ASCEND 500  
 EXPNO 36  
 PROCNO 1

F2 - Acquisition Parameters  
 Date\_ 20211207  
 Time 12.42 h  
 INSTRUM spect  
 PROBRD zll9470\_0291 ( )  
 FULPROG zgpg  
 TD 65536  
 ID SOLVENT CDC13  
 NS 16  
 DS 2  
 SWH 10000.000 Hz  
 FIDRES 0.305176 Hz  
 AQ 3.2767999 sec  
 RG 108.78  
 DW 50.000 usec  
 DE 6.50 usec  
 TE 297.0 K  
 D1 1.00000000 sec  
 TD0  
 SFO1 500.372098 MHz  
 NUC1 1H  
 P1 10.00 usec  
 FWH 23.23100038 W

F2 - Processing parameters  
 SI 65536  
 SF 500.3690159 MHz  
 WDW EM  
 SSB 0  
 LB 0.30 Hz  
 GB 0  
 PC 1.00

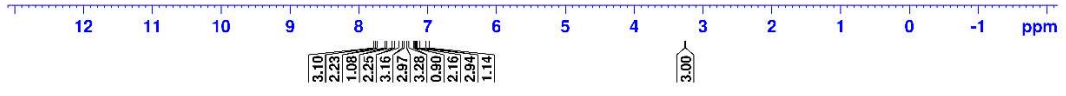

P-44

7.561  
7.559  
7.755  
7.745  
7.743  
7.616  
7.601  
7.517  
7.502  
7.489  
7.486  
7.408  
7.406  
7.403  
7.401  
7.391  
7.389  
7.387  
7.379  
7.376  
7.336  
7.333  
7.331  
7.328  
7.321  
7.317  
7.310  
7.306  
7.299  
7.297  
7.293  
7.291  
7.288  
7.285  
7.279  
7.252  
7.200  
7.192  
7.188  
7.183  
7.178  
7.175  
7.172  
7.168  
7.165  
7.152  
7.148  
7.141  
7.136  
7.132  
7.129  
7.119  
7.117  
7.016  
7.003  
7.001  
6.987

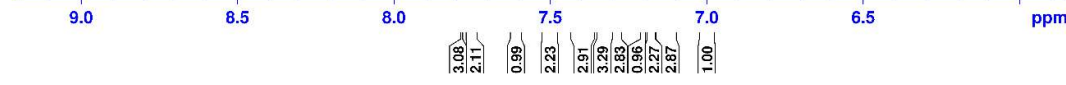

SYSC-P-44

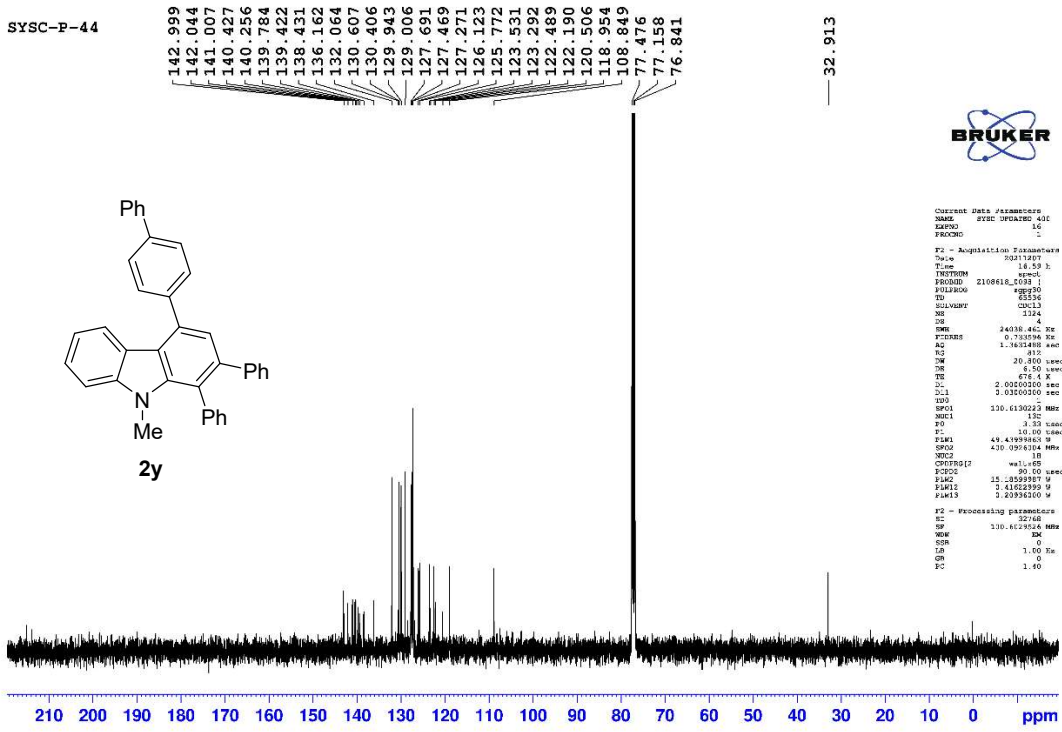

SYSC-P-44

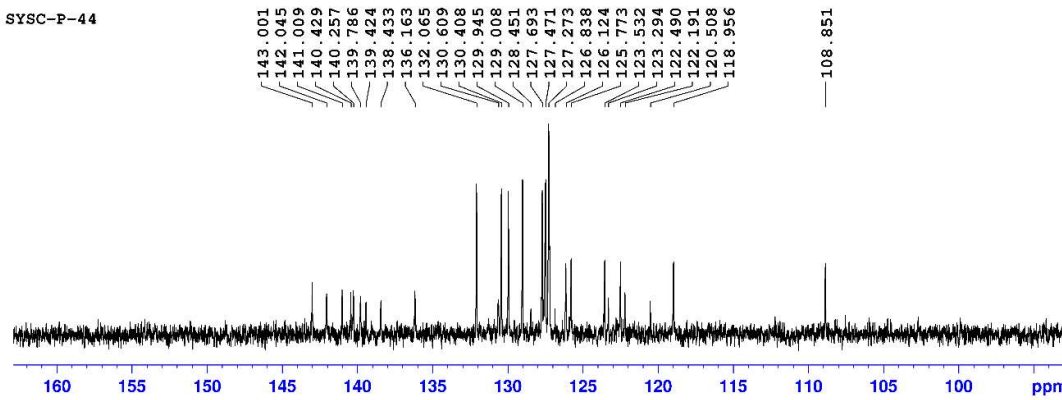



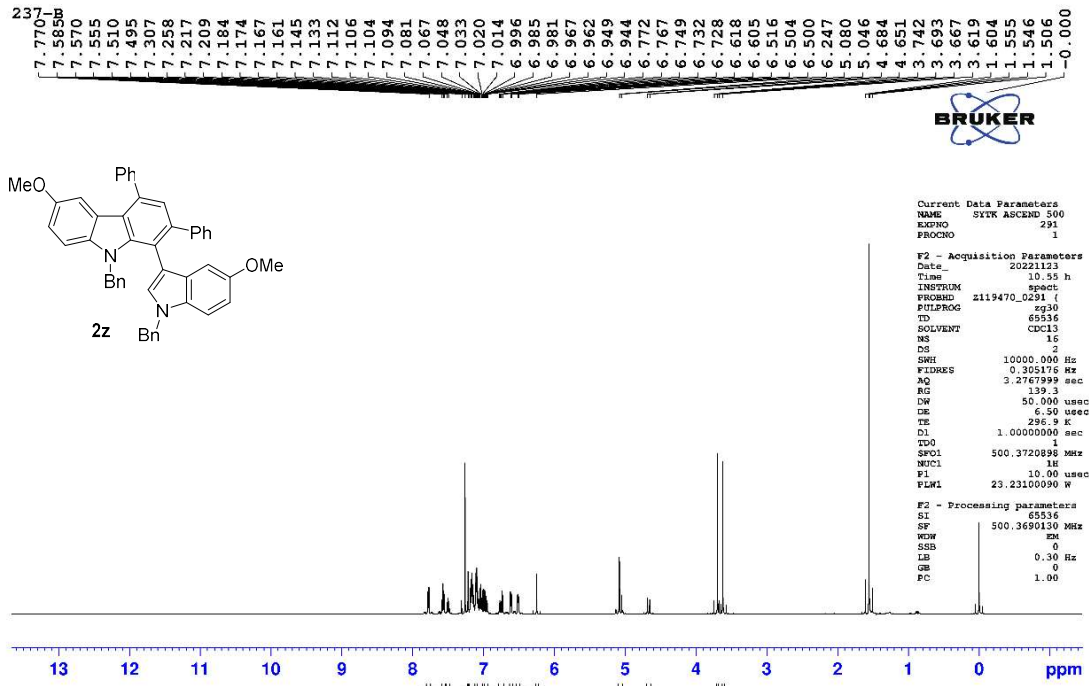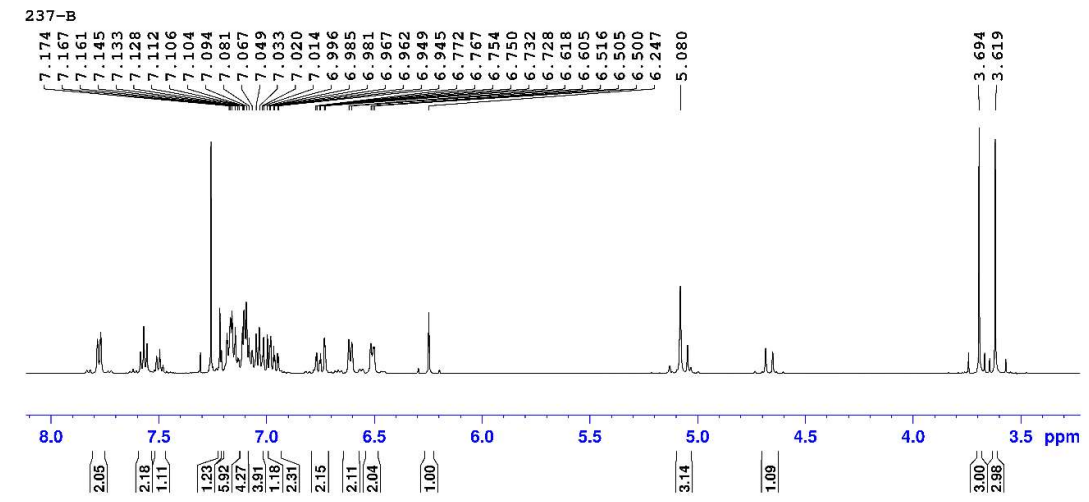

SYTK- 237-B

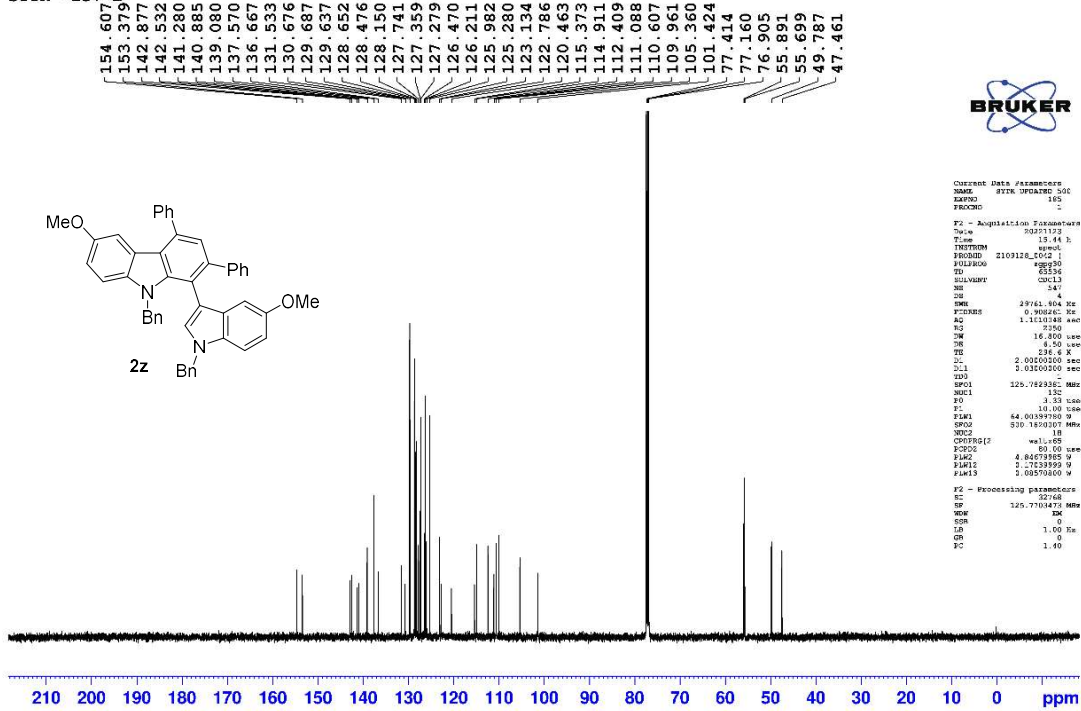

SYTK- 237-B

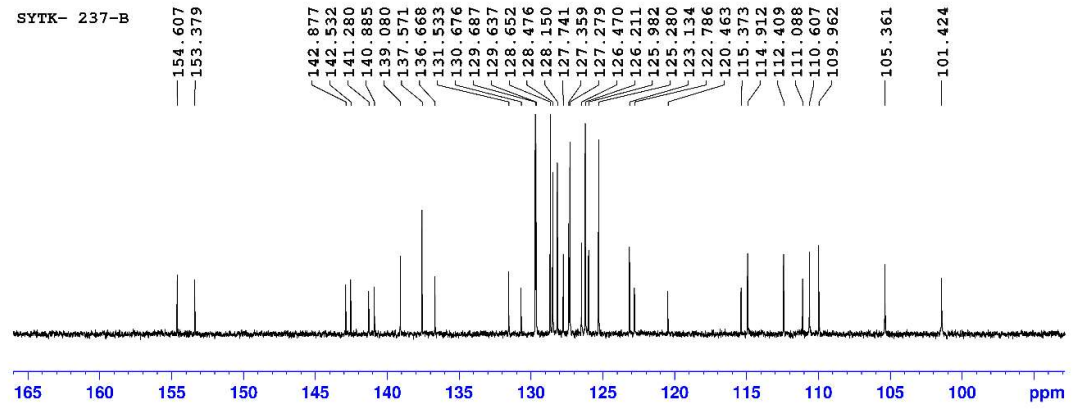

SYTK-121

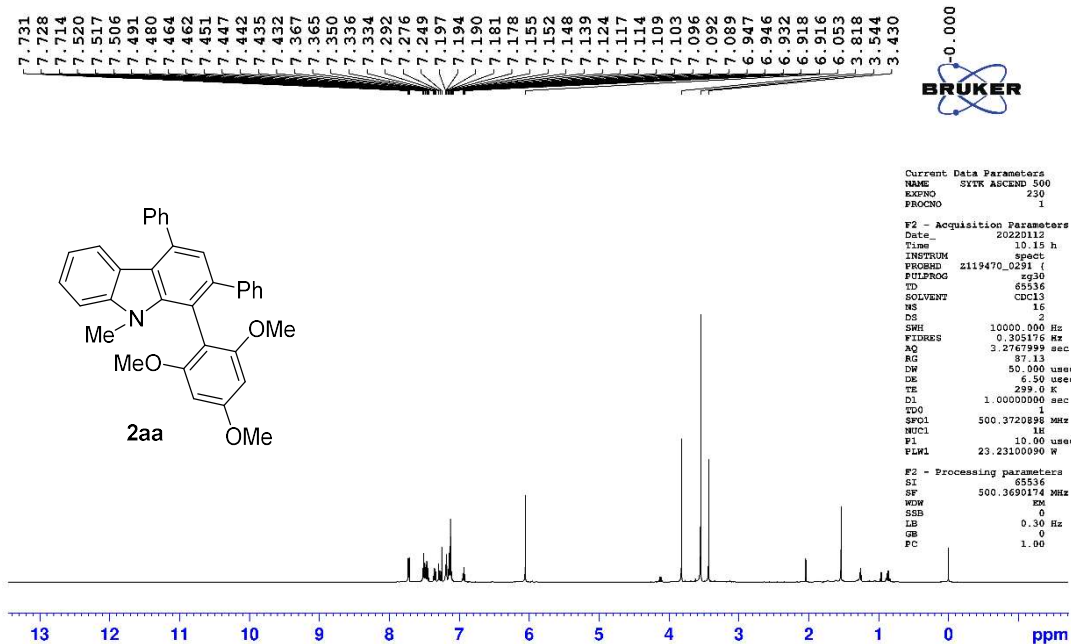

SYTK-121

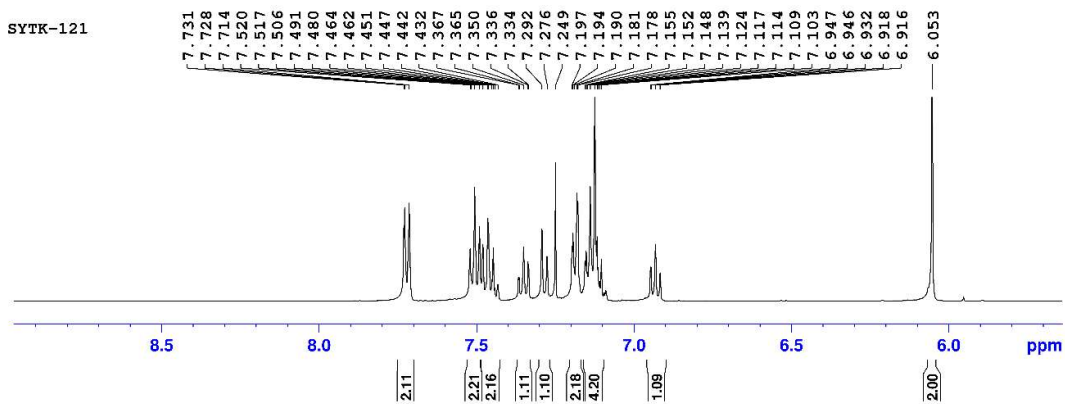

SYTK-121

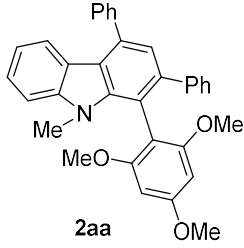

161.579  
159.499  
143.075  
142.498  
141.750  
141.147  
140.145  
136.231  
129.672  
129.256  
128.373  
127.377  
127.014  
125.953  
125.125  
123.215  
122.503  
122.279  
120.217  
118.314  
114.661  
108.708  
108.365  
90.145  
77.414  
77.160  
76.906  
55.630  
55.399

30.694

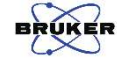

```

Current Data Parameters
NAME      SYTK_UPDATED_501
SAMPNO   1
PROCNO   1

F2 - Acquisition Parameters
Date_    2020119
Time     14.31.1
INSTRUM  spect
PROBHD   2109128_002
PULPROG  zgpg30
TD        65536
SOLVENT  CDCl3
NS        4
DS        4
SWH       29161.604 Hz
FIDRES    0.400000 Hz
AQ        1.1110248 sec
RG        2500
SFO       16.400 sec
DE        4.50 sec
TE        300.0 K
SI        2.0000000 sec
SFO2      3.0000000 sec
AQ2        1
SFO3      125.7629981 MHz
AQ3        1
SFO4      3.33 sec
SFO5      10.00 sec
SFO6      44.0000000 MHz
SFO7      370.0000000 MHz
SFO8      18
SFO9      18
SFO10     wall:0.00
SFO11     80.00 sec
SFO12     4.8400000 MHz
SFO13     1.7638889 MHz
SFO14     1.0000000 MHz

F2 - Processing parameters
SI        32768
SF        125.7700471 MHz
WDW       EM
SSB       0
GB        0
CB        1.00 Hz
DB        0
PC        1.40

```

210 200 190 180 170 160 150 140 130 120 110 100 90 80 70 60 50 40 30 20 10 0 ppm

SYTK-121

161.579  
159.499  
143.075  
142.498  
141.750  
141.147  
140.145  
136.231  
129.672  
129.256  
128.374  
127.377  
127.014  
125.953  
125.125  
123.215  
122.503  
122.279  
120.217  
118.314  
114.661  
108.708  
108.365  
90.145

165 160 155 150 145 140 135 130 125 120 115 110 105 100 95 90 ppm
